# Supplementary material for: β-1,4-Xylan backbone synthesis in higher plants: How complex can it be?
Source: Front Plant Sci. 2023 Jan 11;13:1076298. doi: 10.3389/fpls.2022.1076298 (PMC9874913; doi:10.3389/fpls.2022.1076298)
Supplement: Supplementary file 7 [file Table_1.xlsx]

## Sheet: IRX14 1
Mascot scores of anti-GFP immunoprecipitation
		IRX14-GFP 1
prot_acc	prot_desc	protein score
AT5G28540	AT5G28540 BIP1 heat shock protein 70 (Hsp 70) family protein	2144
AT1G76010	AT1G76010 Alba DNA/RNA-binding protein	1699
AT1G16610	AT1G16610 SR45 arginine/serine-rich 45	1584
AT1G20220	AT1G20220 Alba DNA/RNA-binding protein	1336
AT5G52470	AT5G52470 FIB1, FBR1, ATFIB1, ATFBR1, SKIP7 fibrillarin 1	1324
AT4G25630	AT4G25630 FIB2, ATFIB2 fibrillarin 2	1281
AT4G36890	AT4G36890 IRX14	1248
AT3G57150	AT3G57150 NAP57, AtNAP57, CBF5, AtCBF5 homologue of NAP57	1052
AT5G17920	AT5G17920 ATCIMS, ATMETS, ATMS1 Cobalamin-independent synthase family protein	1028
AT3G16460	AT3G16460 Mannose-binding lectin superfamily protein	829
AT1G66280	AT1G66280 BGLU22 Glycosyl hydrolase superfamily protein	787
AT5G02500	AT5G02500 HSC70-1, HSP70-1, AT-HSC70-1, HSC70 heat shock cognate protein 70-1	783
AT3G03780	AT3G03780 ATMS2, MS2 methionine synthase 2	778
AT1G66270	AT1G66270 BGLU21 Glycosyl hydrolase superfamily protein	689
AT5G37720	AT5G37720 ALY4 ALWAYS EARLY 4	644
AT1G72370	AT1G72370 P40, AP40, RP40, RPSAA 40s ribosomal protein SA	638
AT1G07920	AT1G07920 collapsed_with_AT1G07930_AT1G07940_AT5G60390	623
AT2G31610	AT2G31610 Ribosomal protein S3 family protein	593
AT5G07350	AT5G07350 Tudor1, AtTudor1, TSN1 TUDOR-SN protein 1	521
AT5G64200	AT5G64200 ATSC35, SC35, At-SC35 ortholog of human splicing factor SC35	479
AT2G20580	AT2G20580 RPN1A, ATRPN1A 26S proteasome regulatory subunit S2 1A	459
AT1G13440	AT1G13440 GAPC-2, GAPC2 glyceraldehyde-3-phosphate dehydrogenase C2	457
AT5G61780	AT5G61780 Tudor2, AtTudor2, TSN2 TUDOR-SN protein 2	452
AT3G09260	AT3G09260 PYK10, PSR3, BGLU23, LEB Glycosyl hydrolase superfamily protein	439
AT4G28470	AT4G28470 RPN1B, ATRPN1B 26S proteasome regulatory subunit S2 1B	427
AT1G06220	AT1G06220 MEE5 Ribosomal protein S5/Elongation factor G/III/V family protein	418
AT3G05060	AT3G05060 NOP56-like pre RNA processing ribonucleoprotein	409
AT2G45640	AT2G45640 SAP18, ATSAP18 SIN3 associated polypeptide P18	378
AT5G61840	AT5G61840 IRX10L	363
AT1G22780	AT1G22780 collapsed_with_AT1G34030_AT4G09800	348
AT4G39200	AT4G39200 Ribosomal protein S25 family protein	348
AT3G08580	AT3G08580 AAC1 ADP/ATP carrier 1	343
AT2G36160	AT2G36160 Ribosomal protein S11 family protein	321
AT1G70770	AT1G70770 Protein of unknown function DUF2359, transmembrane	318
AT4G21150	AT4G21150 HAP6 ribophorin II (RPN2) family protein	305
AT5G44340	AT5G44340 TUB4 tubulin beta chain 4	298
AT1G74050	AT1G74050 Ribosomal protein L6 family protein	280
AT1G80070	AT1G80070 SUS2, EMB33, EMB177, EMB14 Pre-mRNA-processing-splicing factor	269
AT3G58510	AT3G58510 DEA(D/H)-box RNA helicase family protein	268
AT3G03920	AT3G03920 H/ACA ribonucleoprotein complex, subunit Gar1/Naf1 protein	268
AT2G41840	AT2G41840 Ribosomal protein S5 family protein	266
AT2G42520	AT2G42520 P-loop containing nucleoside triphosphate hydrolases superfamily protein	264
AT1G27600	AT1G27600 IRX9L	263
AT4G00100	AT4G00100 ATRPS13A, RPS13, PFL2, RPS13A ribosomal protein S13A	263
AT2G18020	AT2G18020 EMB2296 Ribosomal protein L2 family	252
AT3G49910	AT3G49910 Translation protein SH3-like family protein	242
AT4G24190	AT4G24190 SHD, HSP90, AtHsp90, AtHsp90-7 Chaperone protein htpG family protein	233
AT1G11580	AT1G11580 ATPMEPCRA, PMEPCRA methylesterase PCR A	227
AT1G20960	AT1G20960 emb1507 U5 small nuclear ribonucleoprotein helicase, putative	227
AT2G07698	AT2G07698 ATPase, F1 complex, alpha subunit protein	223
AT2G47640	AT2G47640 collapsed_with_AT3G62840	215
AT5G44500	AT5G44500 Small nuclear ribonucleoprotein family protein	211
AT1G04510	AT1G04510 MAC3A MOS4-associated complex 3A	205
AT3G25520	AT3G25520 ATL5, PGY3, OLI5, RPL5A ribosomal protein L5	198
AT5G22880	AT5G22880 H2B, HTB2 histone B2	195
AT2G30490	AT2G30490 ATC4H, C4H, CYP73A5, REF3 cinnamate-4-hydroxylase	194
AT1G20200	AT1G20200 EMB2719, HAP15 PAM domain (PCI/PINT associated module) protein	191
AT3G45030	AT3G45030 collapsed_with_AT5G62300	187
AT1G18540	AT1G18540 Ribosomal protein L6 family protein	187
AT2G30620	AT2G30620 winged-helix DNA-binding transcription factor family protein	186
AT1G04820	AT1G04820 collapsed_with_AT1G50010	185
AT3G07590	AT3G07590 Small nuclear ribonucleoprotein family protein	183
AT5G27120	AT5G27120 NOP56-like pre RNA processing ribonucleoprotein	180
AT1G07660	AT1G07660 collapsed_with_AT1G07820_AT2G28740_AT3G45930_AT3G53730_AT3G46320_AT5G59690_AT5G59970	178
AT5G09900	AT5G09900 EMB2107, RPN5A, MSA 26S proteasome regulatory subunit, putative (RPN5)	173
AT5G23540	AT5G23540 Mov34/MPN/PAD-1 family protein	169
AT2G40510	AT2G40510 Ribosomal protein S26e family protein	169
AT3G13570	AT3G13570 SCL30A, At-SCL30A SC35-like splicing factor 30A	168
AT5G62690	AT5G62690 collapsed_with_AT5G62700	167
AT3G10950	AT3G10950 Zinc-binding ribosomal protein family protein	163
AT2G37270	AT2G37270 ATRPS5B, RPS5B ribosomal protein 5B	161
AT1G29250	AT1G29250 Alba DNA/RNA-binding protein	160
AT1G75990	AT1G75990 PAM domain (PCI/PINT associated module) protein	158
AT3G02090	AT3G02090 MPPBETA Insulinase (Peptidase family M16) protein	156
AT2G33340	AT2G33340 MAC3B MOS4-associated complex 3B	156
AT5G12250	AT5G12250 TUB6 beta-6 tubulin	152
AT4G24820	AT4G24820 26S proteasome, regulatory subunit Rpn7;Proteasome component (PCI) domain	152
AT2G24590	AT2G24590 RSZ22a, At-RSZ22a RNA recognition motif and CCHC-type zinc finger domains containing protein	147
AT3G50670	AT3G50670 U1-70K, U1SNRNP U1 small nuclear ribonucleoprotein-70K	146
AT1G10630	AT1G10630 ATARFA1F, ARFA1F ADP-ribosylation factor A1F	144
AT3G49010	AT3G49010 ATBBC1, BBC1, RSU2 breast basic conserved 1	144
AT5G26710	AT5G26710 Glutamyl/glutaminyl-tRNA synthetase, class Ic	140
AT2G37190	AT2G37190 Ribosomal protein L11 family protein	138
AT1G49240	AT1G49240 ACT8 actin 8	136
AT1G07770	AT1G07770 collapsed_with_AT5G59850	136
AT2G47610	AT2G47610 Ribosomal protein L7Ae/L30e/S12e/Gadd45 family protein	136
AT4G37910	AT4G37910 mtHsc70-1 mitochondrial heat shock protein 70-1	135
AT2G18740	AT2G18740 Small nuclear ribonucleoprotein family protein	134
AT5G66680	AT5G66680 DGL1 dolichyl-diphosphooligosaccharide-protein glycosyltransferase 48kDa subunit family protein	131
AT5G59910	AT5G59910 HTB4 Histone superfamily protein	130
AT2G04390	AT2G04390 Ribosomal S17 family protein	128
AT3G04920	AT3G04920 Ribosomal protein S24e family protein	125
AT3G20370	AT3G20370 TRAF-like family protein	125
AT2G42740	AT2G42740 RPL16A ribosomal protein large subunit 16A	124
AT4G20890	AT4G20890 TUB9 tubulin beta-9 chain	124
AT2G01250	AT2G01250 Ribosomal protein L30/L7 family protein	122
AT2G15400	AT2G15400 RBP36B, NRPE3B DNA-directed RNA polymerase family protein	122
AT2G01210	AT2G01210 Leucine-rich repeat protein kinase family protein	120
AT1G31290	AT1G31290 AGO3 ARGONAUTE 3	120
AT5G14040	AT5G14040 PHT3;1 phosphate transporter 3;1	119
AT1G66260	AT1G66260 RNA-binding (RRM/RBD/RNP motifs) family protein	119
AT1G55310	AT1G55310 SR33, SCL33, At-SCL33 SC35-like splicing factor 33	117
AT2G38770	AT2G38770 EMB2765 P-loop containing nucleoside triphosphate hydrolases superfamily protein	115
AT5G28740	AT5G28740 Tetratricopeptide repeat (TPR)-like superfamily protein	115
AT2G19750	AT2G19750 collapsed_with_AT4G29390_AT5G56670	115
AT1G77180	AT1G77180 SKIP	113
AT1G56110	AT1G56110 NOP56 homolog of nucleolar protein NOP56	113
AT5G08180	AT5G08180 Ribosomal protein L7Ae/L30e/S12e/Gadd45 family protein	113
AT3G55410	AT3G55410 2-oxoglutarate dehydrogenase, E1 component	110
AT3G02560	AT3G02560 Ribosomal protein S7e family protein	107
AT1G08880	AT1G08880 HTA5, H2AXA, G-H2AX, GAMMA-H2AX Histone superfamily protein	105
AT3G20250	AT3G20250 APUM5, PUM5 pumilio 5	103
AT1G53750	AT1G53750 RPT1A regulatory particle triple-A 1A	103
AT3G62120	AT3G62120 Class II aaRS and biotin synthetases superfamily protein	100
AT2G29210	AT2G29210 splicing factor PWI domain-containing protein	98
AT2G24180	AT2G24180 CYP71B6 cytochrome p450 71b6	96
AT4G02930	AT4G02930 GTP binding Elongation factor Tu family protein	95
AT4G15900	AT4G15900 PRL1 pleiotropic regulatory locus 1	93
AT3G20050	AT3G20050 ATTCP-1, TCP-1 T-complex protein 1 alpha subunit	93
AT1G15250	AT1G15250 Zinc-binding ribosomal protein family protein	92
AT2G39460	AT2G39460 ATRPL23A, RPL23A, RPL23AA ribosomal protein L23AA	90
AT5G57370	AT5G57370 unknown protein	90
AT5G67630	AT5G67630 P-loop containing nucleoside triphosphate hydrolases superfamily protein	89
AT1G51760	AT1G51760 IAR3, JR3 peptidase M20/M25/M40 family protein	89
AT1G77120	AT1G77120 ADH1, ADH, ATADH, ATADH1 alcohol dehydrogenase 1	87
AT1G54270	AT1G54270 EIF4A-2 eif4a-2	87
AT4G26910	AT4G26910 Dihydrolipoamide succinyltransferase	86
AT3G04230	AT3G04230 Ribosomal protein S5 domain 2-like superfamily protein	86
AT3G51980	AT3G51980 ARM repeat superfamily protein	86
AT4G34670	AT4G34670 Ribosomal protein S3Ae	85
AT3G05590	AT3G05590 RPL18 ribosomal protein L18	85
AT1G07670	AT1G07670 ATECA4, ECA4 endomembrane-type CA-ATPase 4	83
AT4G21710	AT4G21710 NRPB2, EMB1989, RPB2 DNA-directed RNA polymerase family protein	83
AT1G80930	AT1G80930 MIF4G domain-containing protein / MA3 domain-containing protein	83
AT3G05530	AT3G05530 RPT5A, ATS6A regulatory particle triple-A ATPase 5A	82
AT1G30630	AT1G30630 Coatomer epsilon subunit	82
AT1G09760	AT1G09760 U2A~ U2 small nuclear ribonucleoprotein A	81
AT5G26260	AT5G26260 TRAF-like family protein	80
AT4G27090	AT4G27090 Ribosomal protein L14	78
AT1G26630	AT1G26630 FBR12, ATELF5A-2, ELF5A-2 Eukaryotic translation initiation factor 5A-1 (eIF-5A 1) protein	77
AT1G45000	AT1G45000 AAA-type ATPase family protein	77
AT5G55070	AT5G55070 Dihydrolipoamide succinyltransferase	77
AT1G29880	AT1G29880 glycyl-tRNA synthetase / glycine--tRNA ligase	76
AT2G46280	AT2G46280 TRIP-1, TIF3I1 TGF-beta receptor interacting protein 1	74
AT4G31700	AT4G31700 RPS6, RPS6A ribosomal protein S6	73
AT2G32730	AT2G32730 26S proteasome regulatory complex, non-ATPase subcomplex, Rpn2/Psmd1 subunit	73
AT3G55460	AT3G55460 SCL30, At-SCL30 SC35-like splicing factor 30	73
AT1G76400	AT1G76400 Ribophorin I	70
AT5G22330	AT5G22330 ATTIP49A, RIN1 P-loop containing nucleoside triphosphate hydrolases superfamily protein	69
AT5G19990	AT5G19990 RPT6A, ATSUG1 regulatory particle triple-A ATPase 6A	69
AT1G23410	AT1G23410 Ribosomal protein S27a / Ubiquitin family protein	69
AT2G34970	AT2G34970 Trimeric LpxA-like enzyme	68
AT5G66760	AT5G66760 SDH1-1 succinate dehydrogenase 1-1	67
AT5G19760	AT5G19760 Mitochondrial substrate carrier family protein	67
AT1G09770	AT1G09770 ATCDC5, CDC5, ATMYBCDC5 cell division cycle 5	67
AT1G51980	AT1G51980 Insulinase (Peptidase family M16) protein	67
AT2G17360	AT2G17360 Ribosomal protein S4 (RPS4A) family protein	66
AT4G15000	AT4G15000 Ribosomal L27e protein family	65
AT1G15690	AT1G15690 AVP1, ATAVP3, AVP-3, AtVHP1;1 Inorganic H pyrophosphatase family protein	64
AT1G71695	AT1G71695 Peroxidase superfamily protein	61
ATMG00070	ATMG00070 NAD9 NADH dehydrogenase subunit 9	60
AT3G02760	AT3G02760 Class II aaRS and biotin synthetases superfamily protein	59
AT3G46060	AT3G46060 ARA3, ARA-3, ATRABE1C, ATRAB8A, RAB8A RAB GTPase homolog 8A	59
AT5G08670	AT5G08670 ATP synthase alpha/beta family protein	58
AT1G07360	AT1G07360 CCCH-type zinc fingerfamily protein with RNA-binding domain	58
AT1G15200	AT1G15200 protein-protein interaction regulator family protein	58
AT4G31480	AT4G31480 Coatomer, beta subunit	57
AT1G14850	AT1G14850 NUP155 nucleoporin 155	57
AT1G29310	AT1G29310 SecY protein transport family protein	57
AT4G33360	AT4G33360 FLDH NAD(P)-binding Rossmann-fold superfamily protein	57
AT2G47470	AT2G47470 ATPDIL2-1, UNE5, MEE30, PDI11, ATPDI11 thioredoxin family protein	56
AT3G06480	AT3G06480 DEAD box RNA helicase family protein	55
AT2G20140	AT2G20140 AAA-type ATPase family protein	55
AT1G14610	AT1G14610 TWN2, VALRS valyl-tRNA synthetase / valine--tRNA ligase (VALRS)	55
AT4G24330	AT4G24330 Protein of unknown function (DUF1682)	55
AT4G23850	AT4G23850 LACS4 AMP-dependent synthetase and ligase family protein	55
AT1G09590	AT1G09590 collapsed_with_AT1G09690	55
AT1G08360	AT1G08360 Ribosomal protein L1p/L10e family	53
AT3G08030	AT3G08030 Protein of unknown function, DUF642	53
AT3G53740	AT3G53740 Ribosomal protein L36e family protein	53
AT1G55850	AT1G55850 ATCSLE1, CSLE1 cellulose synthase like E1	53
AT5G64270	AT5G64270 splicing factor, putative	52
AT4G35800	AT4G35800 NRPB1, RPB1, RNA_POL_II_LSRNA_POL_II_LS, RNA_POL_II_LS RNA polymerase II large subunit	52
AT5G26360	AT5G26360 TCP-1/cpn60 chaperonin family protein	51
AT4G13930	AT4G13930 SHM4 serine hydroxymethyltransferase 4	51
AT5G60640	AT5G60640 ATPDIL1-4, PDI2, ATPDI2, PDIL1-4 PDI-like 1-4	51
AT1G78900	AT1G78900 VHA-A vacuolar ATP synthase subunit A	50
AT1G56070	AT1G56070 LOS1 Ribosomal protein S5/Elongation factor G/III/V family protein	50
AT3G19820	AT3G19820 DWF1, DIM, EVE1, DIM1, CBB1 cell elongation protein / DWARF1 / DIMINUTO (DIM)	50
AT2G14120	AT2G14120 DRP3B dynamin related protein	50
AT3G51050	AT3G51050 FG-GAP repeat-containing protein	50
AT2G31810	AT2G31810 ACT domain-containing small subunit of acetolactate synthase protein	50
AT2G41475	AT2G41475 Embryo-specific protein 3, (ATS3)	49
AT2G43950	AT2G43950 OEP37, ATOEP37 chloroplast outer envelope protein 37	49
AT5G22650	AT5G22650 HD2B, HDT02, HDT2, ATHD2B, HDA4, HD2, ATHD2 histone deacetylase 2B	49
AT1G48830	AT1G48830 Ribosomal protein S7e family protein	49
AT1G64520	AT1G64520 RPN12a regulatory particle non-ATPase 12A	49
AT5G49880	AT5G49880 mitotic checkpoint family protein	48
AT1G07410	AT1G07410 ATRABA2B, RAB-A2B, ATRAB-A2B, RABA2b RAB GTPase homolog A2B	48
AT3G11710	AT3G11710 ATKRS-1 lysyl-tRNA synthetase 1	47
AT5G41770	AT5G41770 crooked neck protein, putative / cell cycle protein, putative	47
AT1G18850	AT1G18850 unknown protein	47
AT1G48610	AT1G48610 AT hook motif-containing protein	46
AT5G09510	AT5G09510 Ribosomal protein S19 family protein	46
AT5G59950	AT5G59950 RNA-binding (RRM/RBD/RNP motifs) family protein	46
AT2G25110	AT2G25110 SDF2, ATSDL, AtSDF2 stromal cell-derived factor 2-like protein precursor	45
AT5G15550	AT5G15550 Transducin/WD40 repeat-like superfamily protein	45
AT5G65020	AT5G65020 ANNAT2 annexin 2	45
AT1G77030	AT1G77030 hydrolases	45
AT4G26110	AT4G26110 NAP1;1, ATNAP1;1 nucleosome assembly protein1;1	45
AT3G15950	AT3G15950 NAI2 DNA topoisomerase-related	44
AT5G15200	AT5G15200 Ribosomal protein S4	42
AT3G48930	AT3G48930 EMB1080 Nucleic acid-binding, OB-fold-like protein	42
AT3G25840	AT3G25840 Protein kinase superfamily protein	42
AT1G29150	AT1G29150 ATS9, RPN6 non-ATPase subunit 9	41
AT1G09630	AT1G09630 ATRAB11C, ATRABA2A, ATRAB-A2A, RAB-A2A, RAB11c RAB GTPase 11C	41
AT1G67730	AT1G67730 YBR159, KCR1, ATKCR1 beta-ketoacyl reductase 1	41
AT4G22380	AT4G22380 Ribosomal protein L7Ae/L30e/S12e/Gadd45 family protein	41
AT3G07030	AT3G07030 Alba DNA/RNA-binding protein	40
AT1G71220	AT1G71220 EBS1 UDP-glucose:glycoprotein glucosyltransferases;transferases, transferring hexosyl groups;transferases, transferring glycosyl groups	40
AT5G43960	AT5G43960 Nuclear transport factor 2 (NTF2) family protein with RNA binding (RRM-RBD-RNP motifs) domain	40
AT3G52140	AT3G52140 tetratricopeptide repeat (TPR)-containing protein	40
AT3G10090	AT3G10090 collapsed_with_AT5G03850	40
AT1G74380	AT1G74380 XXT5 xyloglucan xylosyltransferase 5	40
AT3G07300	AT3G07300 NagB/RpiA/CoA transferase-like superfamily protein	40
AT2G36530	AT2G36530 LOS2, ENO2 Enolase	39
AT5G20290	AT5G20290 Ribosomal protein S8e family protein	39
AT5G05780	AT5G05780 RPN8A, AE3, ATHMOV34 RP non-ATPase subunit 8A	39
AT5G52040	AT5G52040 ATRSP41, RS41, At-RS41 RNA-binding (RRM/RBD/RNP motifs) family protein	38
AT1G01510	AT1G01510 AN NAD(P)-binding Rossmann-fold superfamily protein	38
AT5G54890	AT5G54890 RNA-binding CRS1 / YhbY (CRM) domain-containing protein	37
AT1G50200	AT1G50200 ALATS, ACD Alanyl-tRNA synthetase	36
AT4G16340	AT4G16340 SPK1 guanyl-nucleotide exchange factors;GTPase binding;GTP binding	36
AT1G06960	AT1G06960 RNA-binding (RRM/RBD/RNP motifs) family protein	36
AT3G11830	AT3G11830 TCP-1/cpn60 chaperonin family protein	36
AT4G16420	AT4G16420 ADA2B, PRZ1 homolog of yeast ADA2 2B	36
AT4G02520	AT4G02520 ATGSTF2, ATPM24, ATPM24, GST2, GSTF2 glutathione S-transferase PHI 2	35
AT3G56150	AT3G56150 EIF3C, ATEIF3C-1, EIF3C-1, ATTIF3C1, TIF3C1 eukaryotic translation initiation factor 3C	35
AT1G54000	AT1G54000 GDSL-like Lipase/Acylhydrolase superfamily protein	35
AT2G40010	AT2G40010 Ribosomal protein L10 family protein	35
AT4G29830	AT4G29830 VIP3 Transducin/WD40 repeat-like superfamily protein	34
AT1G24510	AT1G24510 TCP-1/cpn60 chaperonin family protein	34
AT4G39260	AT4G39260 CCR1, ATGRP8, GR-RBP8, GRP8 cold, circadian rhythm, and RNA binding 1	34
AT3G05560	AT3G05560 Ribosomal L22e protein family	34
AT3G54540	AT3G54540 ATGCN4, GCN4 general control non-repressible 4	34
AT1G24706	AT1G24706 THO2 THO2	33
AT5G26667	AT5G26667 PYR6 P-loop containing nucleoside triphosphate hydrolases superfamily protein	33
AT1G27400	AT1G27400 Ribosomal protein L22p/L17e family protein	32
AT1G55040	AT1G55040 zinc finger (Ran-binding) family protein	32
AT5G49850	AT5G49850 Mannose-binding lectin superfamily protein	32
AT4G35630	AT4G35630 PSAT phosphoserine aminotransferase	32
AT3G09630	AT3G09630 Ribosomal protein L4/L1 family	32
AT5G46630	AT5G46630 Clathrin adaptor complexes medium subunit family protein	32
AT1G47550	AT1G47550 SEC3A exocyst complex component sec3A	32
AT3G13790	AT3G13790 ATCWINV1, ATBFRUCT1 Glycosyl hydrolases family 32 protein	32
AT3G53500	AT3G53500 RSZ32, RS2Z32, At-RS2Z RNA-binding (RRM/RBD/RNP motifs) family protein with retrovirus zinc finger-like domain	32
AT1G04270	AT1G04270 RPS15 cytosolic ribosomal protein S15	32
AT3G09680	AT3G09680 Ribosomal protein S12/S23 family protein	32
AT5G45510	AT5G45510 Leucine-rich repeat (LRR) family protein	31
AT4G38630	AT4G38630 RPN10, MCB1, ATMCB1, MBP1 regulatory particle non-ATPase 10	31
AT5G23630	AT5G23630 PDR2, MIA phosphate deficiency response 2	31
AT1G44350	AT1G44350 ILL6 IAA-leucine resistant (ILR)-like gene 6	31
AT2G43460	AT2G43460 collapsed_with_AT3G59540	31
AT5G42740	AT5G42740 Sugar isomerase (SIS) family protein	31
AT5G22500	AT5G22500 FAR1 fatty acid reductase 1	31
AT1G49780	AT1G49780 PUB26 plant U-box 26	30
AT1G52360	AT1G52360 Coatomer, beta~ subunit	30
AT1G33790	AT1G33790 jacalin lectin family protein	30
AT1G10580	AT1G10580 Transducin/WD40 repeat-like superfamily protein	30
AT4G38220	AT4G38220 Peptidase M20/M25/M40 family protein	30
AT3G02080	AT3G02080 Ribosomal protein S19e family protein	30
AT3G54860	AT3G54860 ATVPS33, VPS33 Sec1/munc18-like (SM) proteins superfamily	30
AT3G48560	AT3G48560 CSR1, ALS, AHAS, TZP5, IMR1 chlorsulfuron/imidazolinone resistant 1	30
AT1G20580	AT1G20580 Small nuclear ribonucleoprotein family protein	30
AT1G28307	AT1G28307 unknown protein	30
AT1G10290	AT1G10290 ADL6, DRP2A dynamin-like protein 6	30
AT1G18080	AT1G18080 ATARCA, RACK1A_AT, RACK1A Transducin/WD40 repeat-like superfamily protein	29
AT4G10320	AT4G10320 tRNA synthetase class I (I, L, M and V) family protein	29
AT5G57460	AT5G57460 unknown protein	29
AT2G37340	AT2G37340 RSZ33, ATRSZ33, RS2Z33, AT-RS2Z33 arginine/serine-rich zinc knuckle-containing protein 33	29
AT1G64650	AT1G64650 Major facilitator superfamily protein	29
AT5G13530	AT5G13530 KEG protein kinases;ubiquitin-protein ligases	29
AT2G40290	AT2G40290 Eukaryotic translation initiation factor 2 subunit 1	29
AT5G07340	AT5G07340 Calreticulin family protein	29
AT2G01720	AT2G01720 Ribophorin I	28
AT3G21140	AT3G21140 Pyridoxamine 5~-phosphate oxidase family protein	28
AT1G55810	AT1G55810 UKL3 uridine kinase-like 3	28
AT4G20450	AT4G20450 Leucine-rich repeat protein kinase family protein	28
AT5G42150	AT5G42150 Glutathione S-transferase family protein	27
AT1G54990	AT1G54990 AXR4, RGR, RGR1 alpha/beta-Hydrolases superfamily protein	27
AT1G69620	AT1G69620 RPL34 ribosomal protein L34	27
AT1G07070	AT1G07070 Ribosomal protein L35Ae family protein	27
AT1G58170	AT1G58170 Disease resistance-responsive (dirigent-like protein) family protein	27
AT4G34200	AT4G34200 EDA9 D-3-phosphoglycerate dehydrogenase	26
AT1G33120	AT1G33120 collapsed_with_AT1G33140	26
AT2G37600	AT2G37600 Ribosomal protein L36e family protein	26
AT2G40660	AT2G40660 Nucleic acid-binding, OB-fold-like protein	26
AT1G36240	AT1G36240 Ribosomal protein L7Ae/L30e/S12e/Gadd45 family protein	26
AT2G01410	AT2G01410 NHL domain-containing protein	26
AT3G30380	AT3G30380 alpha/beta-Hydrolases superfamily protein	26
AT1G27090	AT1G27090 glycine-rich protein	25
AT5G13260	AT5G13260 unknown protein	25
AT4G39680	AT4G39680 SAP domain-containing protein	25
AT3G62530	AT3G62530 ARM repeat superfamily protein	25
AT5G42390	AT5G42390 Insulinase (Peptidase family M16) family protein	25
AT1G70180	AT1G70180 Sterile alpha motif (SAM) domain-containing protein	25
AT2G14750	AT2G14750 APK, AKN1, ATAKN1, APK1 APS kinase	25
AT2G26380	AT2G26380 Leucine-rich repeat (LRR) family protein	25
AT1G20330	AT1G20330 SMT2, CVP1, FRL1 sterol methyltransferase 2	24
AT5G25780	AT5G25780 EIF3B-2, EIF3B, ATEIF3B-2 eukaryotic translation initiation factor 3B-2	24
AT3G25860	AT3G25860 LTA2, PLE2 2-oxoacid dehydrogenases acyltransferase family protein	24
AT5G18410	AT5G18410 PIR, KLK, PIR121, SRA1, PIRP, ATSRA1 transcription activators	24
AT3G63400	AT3G63400 Cyclophilin-like peptidyl-prolyl cis-trans isomerase family protein	24
AT4G10750	AT4G10750 Phosphoenolpyruvate carboxylase family protein	24
AT1G52400	AT1G52400 BGL1, BGLU18, ATBG1 beta glucosidase 18	24
AT1G48920	AT1G48920 ATNUC-L1, PARL1, NUC-L1 nucleolin like 1	24
AT5G17440	AT5G17440 LUC7 related protein	24
AT1G36160	AT1G36160 ACC1, AT-ACC1, EMB22, GK, PAS3 acetyl-CoA carboxylase 1	24
AT4G15290	AT4G15290 ATCSLB05, CSLB05, ATCSLB5 Cellulose synthase family protein	24
AT3G24830	AT3G24830 Ribosomal protein L13 family protein	23
AT2G43770	AT2G43770 Transducin/WD40 repeat-like superfamily protein	23
AT4G16720	AT4G16720 Ribosomal protein L23/L15e family protein	23
AT3G43980	AT3G43980 collapsed_with_AT3G44010_AT4G33865	23
AT1G51710	AT1G51710 UBP6, ATUBP6 ubiquitin-specific protease 6	23
AT4G24800	AT4G24800 MA3 domain-containing protein	23
AT3G47460	AT3G47460 ATSMC2 Structural maintenance of chromosomes (SMC) family protein	23
AT3G44110	AT3G44110 ATJ3, ATJ DNAJ homologue 3	22
AT5G50320	AT5G50320 ELO3, HAG3, HAC8, ELP3, AtELP3 radical SAM domain-containing protein / GCN5-related N-acetyltransferase (GNAT) family protein	22
AT5G36970	AT5G36970 NHL25 NDR1/HIN1-like 25	22
AT1G47260	AT1G47260 APFI, GAMMA CA2 gamma carbonic anhydrase 2	22
AT1G27650	AT1G27650 ATU2AF35A U2 snRNP auxiliary factor small subunit, putative	22
AT1G04170	AT1G04170 EIF2 GAMMA eukaryotic translation initiation factor 2 gamma subunit	22
AT1G15440	AT1G15440 PWP2, ATPWP2 periodic tryptophan protein 2	22
AT3G48680	AT3G48680 GAMMA CAL2 gamma carbonic anhydrase-like 2	22
AT4G18030	AT4G18030 S-adenosyl-L-methionine-dependent methyltransferases superfamily protein	22
AT5G64600	AT5G64600 O-fucosyltransferase family protein	22
AT1G76930	AT1G76930 ATEXT4, ORG5, ATEXT1, EXT1, EXT4 extensin 4	22
AT5G19950	AT5G19950 Domain of unknown function (DUF1767)	21
AT1G44542	AT1G44542 Cyclase family protein	20
AT3G63130	AT3G63130 RANGAP1, ATRANGAP1 RAN GTPase activating protein 1	20
AT5G04180	AT5G04180 ATACA3, ACA3 alpha carbonic anhydrase 3	20

## Sheet: IRX14 2
Mascot scores of anti-GFP immunoprecipitation
		IRX14-GFP 2
prot_acc	prot_desc	protein score
ATCG00490	ATCG00490 RBCL ribulose-bisphosphate carboxylases	2906
AT5G42020	AT5G42020 BIP, BIP2 Heat shock protein 70 (Hsp 70) family protein	1092
AT1G07920	AT1G07920 collapsed_with_AT1G07930_AT1G07940_AT5G60390	960
AT5G38420	AT5G38420 Ribulose bisphosphate carboxylase (small chain) family protein	892
AT1G16610	AT1G16610 SR45 arginine/serine-rich 45	876
AT1G76010	AT1G76010 Alba DNA/RNA-binding protein	861
AT1G72150	AT1G72150 PATL1 PATELLIN 1	804
AT5G17920	AT5G17920 ATCIMS, ATMETS, ATMS1 Cobalamin-independent synthase family protein	743
AT4G25630	AT4G25630 FIB2, ATFIB2 fibrillarin 2	707
AT3G12780	AT3G12780 PGK1 phosphoglycerate kinase 1	707
AT1G67090	AT1G67090 RBCS1A ribulose bisphosphate carboxylase small chain 1A	698
AT1G06680	AT1G06680 PSBP-1, OEE2, PSII-P, OE23 photosystem II subunit P-1	673
AT3G16460	AT3G16460 Mannose-binding lectin superfamily protein	659
AT4G36890	AT4G36890 IRX14	653
AT3G04120	AT3G04120 GAPC, GAPC-1, GAPC1 glyceraldehyde-3-phosphate dehydrogenase C subunit 1	645
AT1G78900	AT1G78900 VHA-A vacuolar ATP synthase subunit A	618
AT1G04820	AT1G04820 collapsed_with_AT1G50010	616
AT1G13440	AT1G13440 GAPC-2, GAPC2 glyceraldehyde-3-phosphate dehydrogenase C2	610
AT5G52470	AT5G52470 FIB1, FBR1, ATFIB1, ATFBR1, SKIP7 fibrillarin 1	601
AT1G20260	AT1G20260 ATPase, V1 complex, subunit B protein	601
AT1G20960	AT1G20960 emb1507 U5 small nuclear ribonucleoprotein helicase, putative	574
ATCG00680	ATCG00680 PSBB photosystem II reaction center protein B	562
AT5G02500	AT5G02500 HSC70-1, HSP70-1, AT-HSC70-1, HSC70 heat shock cognate protein 70-1	559
ATCG00480	ATCG00480 ATPB, PB ATP synthase subunit beta	556
AT5G44340	AT5G44340 TUB4 tubulin beta chain 4	544
AT2G29550	AT2G29550 TUB7 tubulin beta-7 chain	520
AT3G09440	AT3G09440 Heat shock protein 70 (Hsp 70) family protein	501
AT3G03780	AT3G03780 ATMS2, MS2 methionine synthase 2	497
AT3G60750	AT3G60750 Transketolase	494
AT5G19770	AT5G19770 collapsed_with_AT5G19780	493
AT3G05060	AT3G05060 NOP56-like pre RNA processing ribonucleoprotein	487
AT1G18080	AT1G18080 ATARCA, RACK1A_AT, RACK1A Transducin/WD40 repeat-like superfamily protein	466
AT2G20580	AT2G20580 RPN1A, ATRPN1A 26S proteasome regulatory subunit S2 1A	456
AT3G26650	AT3G26650 GAPA, GAPA-1 glyceraldehyde 3-phosphate dehydrogenase A subunit	455
AT1G56190	AT1G56190 Phosphoglycerate kinase family protein	447
AT3G08580	AT3G08580 AAC1 ADP/ATP carrier 1	435
AT1G80070	AT1G80070 SUS2, EMB33, EMB177, EMB14 Pre-mRNA-processing-splicing factor	433
AT5G07350	AT5G07350 Tudor1, AtTudor1, TSN1 TUDOR-SN protein 1	430
AT5G61780	AT5G61780 Tudor2, AtTudor2, TSN2 TUDOR-SN protein 2	424
AT4G24190	AT4G24190 SHD, HSP90, AtHsp90, AtHsp90-7 Chaperone protein htpG family protein	424
AT1G22780	AT1G22780 collapsed_with_AT1G34030_AT4G09800	421
AT4G20890	AT4G20890 TUB9 tubulin beta-9 chain	420
AT5G12250	AT5G12250 TUB6 beta-6 tubulin	409
AT2G07698	AT2G07698 ATPase, F1 complex, alpha subunit protein	406
AT1G07670	AT1G07670 ATECA4, ECA4 endomembrane-type CA-ATPase 4	405
AT4G21150	AT4G21150 HAP6 ribophorin II (RPN2) family protein	404
AT4G28470	AT4G28470 RPN1B, ATRPN1B 26S proteasome regulatory subunit S2 1B	403
AT1G15690	AT1G15690 AVP1, ATAVP3, AVP-3, AtVHP1;1 Inorganic H pyrophosphatase family protein	401
AT3G49910	AT3G49910 Translation protein SH3-like family protein	399
AT1G20220	AT1G20220 Alba DNA/RNA-binding protein	389
AT1G06220	AT1G06220 MEE5 Ribosomal protein S5/Elongation factor G/III/V family protein	386
AT1G20200	AT1G20200 EMB2719, HAP15 PAM domain (PCI/PINT associated module) protein	383
AT5G09810	AT5G09810 ACT7 actin 7	379
AT1G77120	AT1G77120 ADH1, ADH, ATADH, ATADH1 alcohol dehydrogenase 1	373
AT5G37720	AT5G37720 ALY4 ALWAYS EARLY 4	361
ATCG00120	ATCG00120 ATPA ATP synthase subunit alpha	361
AT1G79550	AT1G79550 PGK phosphoglycerate kinase	360
AT3G58510	AT3G58510 DEA(D/H)-box RNA helicase family protein	359
AT1G49240	AT1G49240 ACT8 actin 8	354
AT2G42520	AT2G42520 P-loop containing nucleoside triphosphate hydrolases superfamily protein	339
AT4G20260	AT4G20260 ATPCAP1, PCAP1 plasma-membrane associated cation-binding protein 1	337
AT1G10630	AT1G10630 ATARFA1F, ARFA1F ADP-ribosylation factor A1F	334
AT1G55490	AT1G55490 CPN60B, LEN1 chaperonin 60 beta	329
AT5G61840	AT5G61840 IRX10L	327
AT5G26710	AT5G26710 Glutamyl/glutaminyl-tRNA synthetase, class Ic	326
AT5G26360	AT5G26360 TCP-1/cpn60 chaperonin family protein	325
AT2G19730	AT2G19730 Ribosomal L28e protein family	321
AT2G39730	AT2G39730 RCA rubisco activase	317
AT1G72370	AT1G72370 P40, AP40, RP40, RPSAA 40s ribosomal protein SA	301
AT4G02520	AT4G02520 ATGSTF2, ATPM24, ATPM24, GST2, GSTF2 glutathione S-transferase PHI 2	301
AT3G57150	AT3G57150 NAP57, AtNAP57, CBF5, AtCBF5 homologue of NAP57	299
AT2G36530	AT2G36530 LOS2, ENO2 Enolase	296
AT2G42740	AT2G42740 RPL16A ribosomal protein large subunit 16A	295
AT1G22480	AT1G22480 Cupredoxin superfamily protein	291
AT1G66270	AT1G66270 BGLU21 Glycosyl hydrolase superfamily protein	286
AT1G75990	AT1G75990 PAM domain (PCI/PINT associated module) protein	286
AT3G53870	AT3G53870 Ribosomal protein S3 family protein	286
AT1G70770	AT1G70770 Protein of unknown function DUF2359, transmembrane	285
AT2G31610	AT2G31610 Ribosomal protein S3 family protein	275
AT3G14990	AT3G14990 Class I glutamine amidotransferase-like superfamily protein	274
AT4G37910	AT4G37910 mtHsc70-1 mitochondrial heat shock protein 70-1	271
AT5G66680	AT5G66680 DGL1 dolichyl-diphosphooligosaccharide-protein glycosyltransferase 48kDa subunit family protein	271
AT1G66280	AT1G66280 BGLU22 Glycosyl hydrolase superfamily protein	268
AT2G01250	AT2G01250 Ribosomal protein L30/L7 family protein	268
AT1G77180	AT1G77180 SKIP	267
AT1G11580	AT1G11580 ATPMEPCRA, PMEPCRA methylesterase PCR A	266
AT2G30490	AT2G30490 ATC4H, C4H, CYP73A5, REF3 cinnamate-4-hydroxylase	264
AT1G04410	AT1G04410 Lactate/malate dehydrogenase family protein	263
AT4G10340	AT4G10340 LHCB5 light harvesting complex of photosystem II 5	261
AT1G18540	AT1G18540 Ribosomal protein L6 family protein	259
AT3G10950	AT3G10950 Zinc-binding ribosomal protein family protein	257
AT4G31480	AT4G31480 Coatomer, beta subunit	256
AT2G38770	AT2G38770 EMB2765 P-loop containing nucleoside triphosphate hydrolases superfamily protein	251
AT2G27710	AT2G27710 60S acidic ribosomal protein family	251
AT1G04510	AT1G04510 MAC3A MOS4-associated complex 3A	250
AT5G20290	AT5G20290 Ribosomal protein S8e family protein	250
AT2G47110	AT2G47110 UBQ6 ubiquitin 6	246
AT1G56070	AT1G56070 LOS1 Ribosomal protein S5/Elongation factor G/III/V family protein	241
AT3G24830	AT3G24830 Ribosomal protein L13 family protein	240
AT2G30620	AT2G30620 winged-helix DNA-binding transcription factor family protein	239
AT1G09020	AT1G09020 SNF4, ATSNF4 homolog of yeast sucrose nonfermenting 4	239
AT3G09200	AT3G09200 Ribosomal protein L10 family protein	238
AT5G04140	AT5G04140 GLU1, GLS1, GLUS, FD-GOGAT glutamate synthase 1	232
AT2G24200	AT2G24200 Cytosol aminopeptidase family protein	230
AT3G03920	AT3G03920 H/ACA ribonucleoprotein complex, subunit Gar1/Naf1 protein	228
AT5G67630	AT5G67630 P-loop containing nucleoside triphosphate hydrolases superfamily protein	224
AT1G29150	AT1G29150 ATS9, RPN6 non-ATPase subunit 9	224
AT1G17880	AT1G17880 BTF3, ATBTF3 basic transcription factor 3	220
AT2G41840	AT2G41840 Ribosomal protein S5 family protein	219
AT3G12110	AT3G12110 ACT11 actin-11	219
AT2G37620	AT2G37620 collapsed_with_AT3G53750	217
AT1G56110	AT1G56110 NOP56 homolog of nucleolar protein NOP56	216
AT2G28000	AT2G28000 CPN60A, CH-CPN60A, SLP chaperonin-60alpha	214
AT4G15900	AT4G15900 PRL1 pleiotropic regulatory locus 1	213
AT1G31290	AT1G31290 AGO3 ARGONAUTE 3	212
AT1G61520	AT1G61520 LHCA3 photosystem I light harvesting complex gene 3	212
AT1G07320	AT1G07320 RPL4 ribosomal protein L4	212
AT5G61410	AT5G61410 RPE, EMB2728 D-ribulose-5-phosphate-3-epimerase	211
AT3G20050	AT3G20050 ATTCP-1, TCP-1 T-complex protein 1 alpha subunit	208
AT1G14850	AT1G14850 NUP155 nucleoporin 155	206
AT3G11510	AT3G11510 Ribosomal protein S11 family protein	205
AT1G74050	AT1G74050 Ribosomal protein L6 family protein	204
AT3G17390	AT3G17390 MTO3, SAMS3, MAT4 S-adenosylmethionine synthetase family protein	203
AT2G18020	AT2G18020 EMB2296 Ribosomal protein L2 family	202
AT2G21580	AT2G21580 Ribosomal protein S25 family protein	202
AT3G02090	AT3G02090 MPPBETA Insulinase (Peptidase family M16) protein	201
AT5G08670	AT5G08670 ATP synthase alpha/beta family protein	201
AT4G13930	AT4G13930 SHM4 serine hydroxymethyltransferase 4	201
AT5G27850	AT5G27850 Ribosomal protein L18e/L15 superfamily protein	201
AT2G36160	AT2G36160 Ribosomal protein S11 family protein	198
AT3G51800	AT3G51800 ATG2, EBP1, ATEBP1 metallopeptidase M24 family protein	198
AT4G13940	AT4G13940 HOG1, EMB1395, SAHH1, MEE58, ATSAHH1 S-adenosyl-L-homocysteine hydrolase	197
AT2G17360	AT2G17360 Ribosomal protein S4 (RPS4A) family protein	196
AT5G46860	AT5G46860 VAM3, ATVAM3, SYP22, ATSYP22, SGR3 Syntaxin/t-SNARE family protein	195
AT5G14040	AT5G14040 PHT3;1 phosphate transporter 3;1	193
AT3G09820	AT3G09820 ADK1, ATADK1 adenosine kinase 1	192
AT5G26000	AT5G26000 TGG1, BGLU38 thioglucoside glucohydrolase 1	190
AT3G16420	AT3G16420 PBP1, JAL30 PYK10-binding protein 1	189
AT3G58610	AT3G58610 ketol-acid reductoisomerase	189
AT4G12420	AT4G12420 SKU5 Cupredoxin superfamily protein	188
AT2G05070	AT2G05070 LHCB2, LHCB2 photosystem II light harvesting complex gene 2	187
AT3G06480	AT3G06480 DEAD box RNA helicase family protein	186
AT2G45640	AT2G45640 SAP18, ATSAP18 SIN3 associated polypeptide P18	184
AT3G13920	AT3G13920 EIF4A1, RH4, TIF4A1 eukaryotic translation initiation factor 4A1	184
AT2G36880	AT2G36880 MAT3 methionine adenosyltransferase 3	182
AT2G24180	AT2G24180 CYP71B6 cytochrome p450 71b6	181
AT1G75280	AT1G75280 NmrA-like negative transcriptional regulator family protein	181
AT5G24710	AT5G24710 Transducin/WD40 repeat-like superfamily protein	179
AT2G29210	AT2G29210 splicing factor PWI domain-containing protein	179
AT5G64270	AT5G64270 splicing factor, putative	177
AT1G65980	AT1G65980 TPX1 thioredoxin-dependent peroxidase 1	177
AT3G54050	AT3G54050 HCEF1 high cyclic electron flow 1	175
AT5G23540	AT5G23540 Mov34/MPN/PAD-1 family protein	174
AT3G50670	AT3G50670 U1-70K, U1SNRNP U1 small nuclear ribonucleoprotein-70K	174
AT4G26910	AT4G26910 Dihydrolipoamide succinyltransferase	174
AT5G22880	AT5G22880 H2B, HTB2 histone B2	172
AT2G33340	AT2G33340 MAC3B MOS4-associated complex 3B	172
AT3G09740	AT3G09740 SYP71, ATSYP71 syntaxin of plants 71	172
AT3G50820	AT3G50820 PSBO2, PSBO-2, OEC33 photosystem II subunit O-2	171
AT1G09780	AT1G09780 Phosphoglycerate mutase, 2,3-bisphosphoglycerate-independent	171
AT2G39460	AT2G39460 ATRPL23A, RPL23A, RPL23AA ribosomal protein L23AA	170
AT1G27400	AT1G27400 Ribosomal protein L22p/L17e family protein	170
AT1G07360	AT1G07360 CCCH-type zinc fingerfamily protein with RNA-binding domain	170
AT2G24270	AT2G24270 ALDH11A3 aldehyde dehydrogenase 11A3	170
AT5G64200	AT5G64200 ATSC35, SC35, At-SC35 ortholog of human splicing factor SC35	169
AT1G44575	AT1G44575 NPQ4, PSBS Chlorophyll A-B binding family protein	168
AT3G49010	AT3G49010 ATBBC1, BBC1, RSU2 breast basic conserved 1	167
AT1G27600	AT1G27600 IRX9L	166
AT3G55410	AT3G55410 2-oxoglutarate dehydrogenase, E1 component	164
AT2G47640	AT2G47640 collapsed_with_AT3G62840	163
AT5G66760	AT5G66760 SDH1-1 succinate dehydrogenase 1-1	163
AT2G44120	AT2G44120 Ribosomal protein L30/L7 family protein	162
AT1G24510	AT1G24510 TCP-1/cpn60 chaperonin family protein	161
AT1G58270	AT1G58270 ZW9 TRAF-like family protein	161
AT5G19550	AT5G19550 ASP2, AAT2 aspartate aminotransferase 2	158
AT4G21710	AT4G21710 NRPB2, EMB1989, RPB2 DNA-directed RNA polymerase family protein	157
AT4G24820	AT4G24820 26S proteasome, regulatory subunit Rpn7;Proteasome component (PCI) domain	156
AT5G19760	AT5G19760 Mitochondrial substrate carrier family protein	156
AT2G36620	AT2G36620 RPL24A ribosomal protein L24	153
AT5G02870	AT5G02870 Ribosomal protein L4/L1 family	153
AT5G42080	AT5G42080 ADL1, ADL1A, AG68, DRP1A, RSW9, DL1 dynamin-like protein	152
AT3G03250	AT3G03250 UGP, UGP1, AtUGP1 UDP-GLUCOSE PYROPHOSPHORYLASE 1	151
AT5G58290	AT5G58290 RPT3 regulatory particle triple-A ATPase 3	150
AT1G09770	AT1G09770 ATCDC5, CDC5, ATMYBCDC5 cell division cycle 5	148
AT4G10320	AT4G10320 tRNA synthetase class I (I, L, M and V) family protein	147
AT5G26830	AT5G26830 Threonyl-tRNA synthetase	146
AT1G26630	AT1G26630 FBR12, ATELF5A-2, ELF5A-2 Eukaryotic translation initiation factor 5A-1 (eIF-5A 1) protein	144
AT1G65930	AT1G65930 cICDH cytosolic NADP+-dependent isocitrate dehydrogenase	144
AT4G00100	AT4G00100 ATRPS13A, RPS13, PFL2, RPS13A ribosomal protein S13A	143
AT5G09900	AT5G09900 EMB2107, RPN5A, MSA 26S proteasome regulatory subunit, putative (RPN5)	143
AT3G62120	AT3G62120 Class II aaRS and biotin synthetases superfamily protein	143
AT3G16470	AT3G16470 JR1 Mannose-binding lectin superfamily protein	142
AT1G07770	AT1G07770 collapsed_with_AT5G59850	141
AT3G52930	AT3G52930 Aldolase superfamily protein	141
AT2G46280	AT2G46280 TRIP-1, TIF3I1 TGF-beta receptor interacting protein 1	140
AT2G21390	AT2G21390 Coatomer, alpha subunit	140
AT3G13580	AT3G13580 Ribosomal protein L30/L7 family protein	139
AT4G31700	AT4G31700 RPS6, RPS6A ribosomal protein S6	138
AT5G22330	AT5G22330 ATTIP49A, RIN1 P-loop containing nucleoside triphosphate hydrolases superfamily protein	138
AT3G60770	AT3G60770 Ribosomal protein S13/S15	138
AT3G18190	AT3G18190 TCP-1/cpn60 chaperonin family protein	137
AT1G73230	AT1G73230 Nascent polypeptide-associated complex NAC	137
AT1G22530	AT1G22530 PATL2 PATELLIN 2	137
AT2G17420	AT2G17420 NTRA, ATNTRA, NTR2 NADPH-dependent thioredoxin reductase A	137
AT5G64760	AT5G64760 RPN5B regulatory particle non-ATPase subunit 5B	135
AT2G15430	AT2G15430 RBP36A, RPB35A, NRPB3, NRPD3, NRPE3A DNA-directed RNA polymerase family protein	135
AT2G32730	AT2G32730 26S proteasome regulatory complex, non-ATPase subcomplex, Rpn2/Psmd1 subunit	133
AT1G79530	AT1G79530 GAPCP-1 glyceraldehyde-3-phosphate dehydrogenase of plastid 1	133
AT3G04940	AT3G04940 ATCYSD1, CYSD1 cysteine synthase D1	133
AT4G34200	AT4G34200 EDA9 D-3-phosphoglycerate dehydrogenase	132
AT2G20140	AT2G20140 AAA-type ATPase family protein	131
AT1G50480	AT1G50480 THFS 10-formyltetrahydrofolate synthetase	131
ATCG00340	ATCG00340 PSAB Photosystem I, PsaA/PsaB protein	130
AT5G27120	AT5G27120 NOP56-like pre RNA processing ribonucleoprotein	129
AT3G02760	AT3G02760 Class II aaRS and biotin synthetases superfamily protein	129
AT3G19820	AT3G19820 DWF1, DIM, EVE1, DIM1, CBB1 cell elongation protein / DWARF1 / DIMINUTO (DIM)	129
AT3G62360	AT3G62360 Carbohydrate-binding-like fold	129
AT3G63410	AT3G63410 APG1, VTE3, IEP37, E37 S-adenosyl-L-methionine-dependent methyltransferases superfamily protein	129
AT2G39990	AT2G39990 EIF2, AteIF3f, eIF3F eukaryotic translation initiation factor 2	129
AT1G45000	AT1G45000 AAA-type ATPase family protein	128
AT5G01530	AT5G01530 LHCB4 light harvesting complex photosystem II	128
AT1G29880	AT1G29880 glycyl-tRNA synthetase / glycine--tRNA ligase	126
AT1G08360	AT1G08360 Ribosomal protein L1p/L10e family	126
AT5G15200	AT5G15200 Ribosomal protein S4	126
AT3G13570	AT3G13570 SCL30A, At-SCL30A SC35-like splicing factor 30A	125
AT1G09760	AT1G09760 U2A~ U2 small nuclear ribonucleoprotein A	125
AT1G71695	AT1G71695 Peroxidase superfamily protein	125
AT3G09900	AT3G09900 ATRABE1E, ATRAB8E, RABE1e RAB GTPase homolog E1E	125
AT3G62700	AT3G62700 ATMRP10, MRP10, ABCC14 multidrug resistance-associated protein 10	124
AT2G27530	AT2G27530 PGY1 Ribosomal protein L1p/L10e family	122
AT3G25520	AT3G25520 ATL5, PGY3, OLI5, RPL5A ribosomal protein L5	122
AT1G07660	AT1G07660 collapsed_with_AT1G07820_AT2G28740_AT3G45930_AT3G53730_AT3G46320_AT5G59690_AT5G59970	122
AT1G15820	AT1G15820 LHCB6, CP24 light harvesting complex photosystem II subunit 6	122
AT2G20450	AT2G20450 Ribosomal protein L14	121
AT1G22410	AT1G22410 Class-II DAHP synthetase family protein	120
AT1G72230	AT1G72230 Cupredoxin superfamily protein	120
AT1G24450	AT1G24450 NFD2 Ribonuclease III family protein	120
AT4G34670	AT4G34670 Ribosomal protein S3Ae	119
AT1G74470	AT1G74470 Pyridine nucleotide-disulphide oxidoreductase family protein	119
AT3G14350	AT3G14350 SRF7 STRUBBELIG-receptor family 7	119
AT5G08180	AT5G08180 Ribosomal protein L7Ae/L30e/S12e/Gadd45 family protein	118
AT1G09340	AT1G09340 CRB, CSP41B, HIP1 chloroplast RNA binding	118
AT3G09260	AT3G09260 PYK10, PSR3, BGLU23, LEB Glycosyl hydrolase superfamily protein	117
AT4G15000	AT4G15000 Ribosomal L27e protein family	116
AT3G07590	AT3G07590 Small nuclear ribonucleoprotein family protein	116
AT1G51760	AT1G51760 IAR3, JR3 peptidase M20/M25/M40 family protein	116
AT3G55460	AT3G55460 SCL30, At-SCL30 SC35-like splicing factor 30	116
AT5G25980	AT5G25980 TGG2, BGLU37 glucoside glucohydrolase 2	116
AT1G14320	AT1G14320 SAC52, RPL10, RPL10A Ribosomal protein L16p/L10e family protein	115
AT2G43970	AT2G43970 RNA-binding protein	113
AT1G19920	AT1G19920 APS2, ASA1 Pseudouridine synthase/archaeosine transglycosylase-like family protein	112
AT2G34470	AT2G34470 UREG, PSKF109 urease accessory protein G	112
AT2G37190	AT2G37190 Ribosomal protein L11 family protein	111
AT3G45030	AT3G45030 collapsed_with_AT5G62300	111
AT3G01280	AT3G01280 VDAC1, ATVDAC1 voltage dependent anion channel 1	111
AT3G16240	AT3G16240 DELTA-TIP, TIP2;1, DELTA-TIP1, AQP1, ATTIP2;1 delta tonoplast integral protein	111
AT3G56150	AT3G56150 EIF3C, ATEIF3C-1, EIF3C-1, ATTIF3C1, TIF3C1 eukaryotic translation initiation factor 3C	110
AT2G02740	AT2G02740 ATWHY3, PTAC11, WHY3 ssDNA-binding transcriptional regulator	110
AT3G07770	AT3G07770 Hsp89, AtHsp90, AtHsp90-6 HEAT SHOCK PROTEIN 89	110
AT1G09620	AT1G09620 ATP binding;leucine-tRNA ligases;aminoacyl-tRNA ligases;nucleotide binding;ATP binding;aminoacyl-tRNA ligases	110
AT5G59290	AT5G59290 UXS3, ATUXS3 UDP-glucuronic acid decarboxylase 3	110
ATCG00020	ATCG00020 PSBA photosystem II reaction center protein A	108
AT5G19990	AT5G19990 RPT6A, ATSUG1 regulatory particle triple-A ATPase 6A	107
AT4G35800	AT4G35800 NRPB1, RPB1, RNA_POL_II_LSRNA_POL_II_LS, RNA_POL_II_LS RNA polymerase II large subunit	107
AT5G62200	AT5G62200 Embryo-specific protein 3, (ATS3)	107
AT1G33120	AT1G33120 collapsed_with_AT1G33140	106
AT3G44300	AT3G44300 NIT2, AtNIT2 nitrilase 2	106
AT5G09590	AT5G09590 MTHSC70-2, HSC70-5 mitochondrial HSO70 2	106
AT5G39850	AT5G39850 Ribosomal protein S4	106
AT5G28740	AT5G28740 Tetratricopeptide repeat (TPR)-like superfamily protein	105
AT3G55440	AT3G55440 ATCTIMC, TPI, CYTOTPI triosephosphate isomerase	105
AT2G14120	AT2G14120 DRP3B dynamin related protein	104
AT4G32150	AT4G32150 VAMP711, ATVAMP711 vesicle-associated membrane protein 711	104
AT3G04920	AT3G04920 Ribosomal protein S24e family protein	103
AT2G34970	AT2G34970 Trimeric LpxA-like enzyme	103
AT5G12470	AT5G12470 Protein of unknown function (DUF3411)	103
AT5G57370	AT5G57370 unknown protein	102
AT4G04910	AT4G04910 NSF AAA-type ATPase family protein	102
AT1G60420	AT1G60420 DC1 domain-containing protein	102
AT1G09310	AT1G09310 Protein of unknown function, DUF538	102
AT1G15250	AT1G15250 Zinc-binding ribosomal protein family protein	101
AT1G52360	AT1G52360 Coatomer, beta~ subunit	101
AT2G30930	AT2G30930 unknown protein	101
AT3G15980	AT3G15980 Coatomer, beta~ subunit	101
AT3G62870	AT3G62870 Ribosomal protein L7Ae/L30e/S12e/Gadd45 family protein	100
ATCG00540	ATCG00540 PETA photosynthetic electron transfer A	100
AT1G30360	AT1G30360 ERD4 Early-responsive to dehydration stress protein (ERD4)	100
AT5G14910	AT5G14910 Heavy metal transport/detoxification superfamily protein	100
AT5G27470	AT5G27470 seryl-tRNA synthetase / serine--tRNA ligase	100
AT4G02930	AT4G02930 GTP binding Elongation factor Tu family protein	99
AT2G01210	AT2G01210 Leucine-rich repeat protein kinase family protein	99
AT2G47610	AT2G47610 Ribosomal protein L7Ae/L30e/S12e/Gadd45 family protein	99
AT3G08530	AT3G08530 Clathrin, heavy chain	99
AT2G40650	AT2G40650 PRP38 family protein	99
AT3G47520	AT3G47520 MDH malate dehydrogenase	98
AT1G07370	AT1G07370 PCNA1, ATPCNA1 proliferating cellular nuclear antigen 1	98
AT2G30050	AT2G30050 transducin family protein / WD-40 repeat family protein	98
AT2G04390	AT2G04390 Ribosomal S17 family protein	97
AT5G42150	AT5G42150 Glutathione S-transferase family protein	97
AT1G62020	AT1G62020 Coatomer, alpha subunit	97
AT3G55220	AT3G55220 collapsed_with_AT3G55200	97
AT2G37270	AT2G37270 ATRPS5B, RPS5B ribosomal protein 5B	96
AT1G04810	AT1G04810 26S proteasome regulatory complex, non-ATPase subcomplex, Rpn2/Psmd1 subunit	96
AT1G51980	AT1G51980 Insulinase (Peptidase family M16) protein	95
AT2G16060	AT2G16060 GLB1, AHB1, ARATH GLB1, NSHB1, ATGLB1, HB1 hemoglobin 1	95
AT2G47800	AT2G47800 ATMRP4, EST3, MRP4, ABCC4 multidrug resistance-associated protein 4	95
AT5G52520	AT5G52520 OVA6, PRORS1 Class II aaRS and biotin synthetases superfamily protein	94
AT5G05780	AT5G05780 RPN8A, AE3, ATHMOV34 RP non-ATPase subunit 8A	93
AT5G49850	AT5G49850 Mannose-binding lectin superfamily protein	93
AT3G62030	AT3G62030 ROC4 rotamase CYP 4	93
AT1G02130	AT1G02130 ATRAB1B, ARA5, ARA-5, ATRABD2A, RABD2A, RA-5 RAS 5	92
AT2G18960	AT2G18960 AHA1, PMA, OST2, HA1 H(+)-ATPase 1	92
AT4G35630	AT4G35630 PSAT phosphoserine aminotransferase	91
AT1G18450	AT1G18450 ATARP4, ARP4 actin-related protein 4	91
AT1G48410	AT1G48410 AGO1 Stabilizer of iron transporter SufD / Polynucleotidyl transferase	91
AT3G48930	AT3G48930 EMB1080 Nucleic acid-binding, OB-fold-like protein	90
AT3G02360	AT3G02360 6-phosphogluconate dehydrogenase family protein	90
AT1G23190	AT1G23190 PGM3 Phosphoglucomutase/phosphomannomutase family protein	89
AT2G01720	AT2G01720 Ribophorin I	88
AT1G20330	AT1G20330 SMT2, CVP1, FRL1 sterol methyltransferase 2	87
AT5G15090	AT5G15090 VDAC3, ATVDAC3 voltage dependent anion channel 3	87
AT2G47470	AT2G47470 ATPDIL2-1, UNE5, MEE30, PDI11, ATPDI11 thioredoxin family protein	86
AT2G37600	AT2G37600 Ribosomal protein L36e family protein	86
AT1G65440	AT1G65440 GTB1 global transcription factor group B1	86
AT4G25730	AT4G25730 FtsJ-like methyltransferase family protein	86
AT1G27090	AT1G27090 glycine-rich protein	85
AT1G08880	AT1G08880 HTA5, H2AXA, G-H2AX, GAMMA-H2AX Histone superfamily protein	84
AT1G09630	AT1G09630 ATRAB11C, ATRABA2A, ATRAB-A2A, RAB-A2A, RAB11c RAB GTPase 11C	84
AT1G50200	AT1G50200 ALATS, ACD Alanyl-tRNA synthetase	84
AT3G09630	AT3G09630 Ribosomal protein L4/L1 family	84
AT5G25780	AT5G25780 EIF3B-2, EIF3B, ATEIF3B-2 eukaryotic translation initiation factor 3B-2	84
AT1G04480	AT1G04480 collapsed_with_AT2G33370_AT3G04400	84
AT1G53500	AT1G53500 MUM4, RHM2, ATRHM2, ATMUM4 NAD-dependent epimerase/dehydratase family protein	84
AT1G26880	AT1G26880 Ribosomal protein L34e superfamily protein	84
AT1G75680	AT1G75680 AtGH9B7, GH9B7 glycosyl hydrolase 9B7	84
AT4G25100	AT4G25100 FSD1, ATFSD1 Fe superoxide dismutase 1	84
AT5G55920	AT5G55920 OLI2 S-adenosyl-L-methionine-dependent methyltransferases superfamily protein	84
AT2G25110	AT2G25110 SDF2, ATSDL, AtSDF2 stromal cell-derived factor 2-like protein precursor	83
AT4G22570	AT4G22570 APT3 adenine phosphoribosyl transferase 3	83
AT1G33590	AT1G33590 Leucine-rich repeat (LRR) family protein	82
AT4G20360	AT4G20360 ATRAB8D, ATRABE1B, RABE1b RAB GTPase homolog E1B	81
AT2G17790	AT2G17790 VPS35A, ZIP3 VPS35 homolog A	81
AT1G76400	AT1G76400 Ribophorin I	80
AT2G37040	AT2G37040 PAL1, ATPAL1 PHE ammonia lyase 1	80
AT1G14610	AT1G14610 TWN2, VALRS valyl-tRNA synthetase / valine--tRNA ligase (VALRS)	79
AT5G56030	AT5G56030 HSP81-2 heat shock protein 81-2	79
AT3G16450	AT3G16450 Mannose-binding lectin superfamily protein	79
AT1G79940	AT1G79940 ATERDJ2A DnaJ / Sec63 Brl domains-containing protein	79
AT4G13780	AT4G13780 methionine--tRNA ligase, putative / methionyl-tRNA synthetase, putative / MetRS, putative	79
AT4G24330	AT4G24330 Protein of unknown function (DUF1682)	78
AT5G52040	AT5G52040 ATRSP41, RS41, At-RS41 RNA-binding (RRM/RBD/RNP motifs) family protein	78
AT5G61790	AT5G61790 CNX1, ATCNX1 calnexin 1	78
AT1G59870	AT1G59870 PEN3, PDR8, ATPDR8, ABCG36, ATABCG36 ABC-2 and Plant PDR ABC-type transporter family protein	78
AT2G35040	AT2G35040 AICARFT/IMPCHase bienzyme family protein	78
AT3G02530	AT3G02530 TCP-1/cpn60 chaperonin family protein	77
AT1G31330	AT1G31330 PSAF photosystem I subunit F	77
AT1G03130	AT1G03130 PSAD-2 photosystem I subunit D-2	77
AT5G44500	AT5G44500 Small nuclear ribonucleoprotein family protein	76
AT3G05530	AT3G05530 RPT5A, ATS6A regulatory particle triple-A ATPase 5A	76
AT4G39260	AT4G39260 CCR1, ATGRP8, GR-RBP8, GRP8 cold, circadian rhythm, and RNA binding 1	76
AT2G40660	AT2G40660 Nucleic acid-binding, OB-fold-like protein	76
AT4G31580	AT4G31580 SRZ-22, SRZ22, RSZP22, RSZ22, At-RSZ22 serine/arginine-rich 22	76
AT3G44310	AT3G44310 NIT1, ATNIT1, NITI nitrilase 1	76
AT1G23860	AT1G23860 SRZ-21, SRZ21, RSZP21, RSZ21, At-RSZ21 RS-containing zinc finger protein 21	76
AT1G43890	AT1G43890 ATRAB18, ATRABC1, RAB18-1, RABC1, ATRAB-C1, RAB18 RAB GTPASE HOMOLOG B18	76
AT5G46630	AT5G46630 Clathrin adaptor complexes medium subunit family protein	75
AT5G45510	AT5G45510 Leucine-rich repeat (LRR) family protein	75
AT1G11840	AT1G11840 GLX1 glyoxalase I homolog	75
AT1G30400	AT1G30400 ATMRP1, EST1, ABCC1, ATABCC1, MRP1 multidrug resistance-associated protein 1	75
AT3G51050	AT3G51050 FG-GAP repeat-containing protein	74
AT2G43770	AT2G43770 Transducin/WD40 repeat-like superfamily protein	74
AT3G49430	AT3G49430 SRp34a, SR34a, At-SR34a SER/ARG-rich protein 34A	74
AT2G33210	AT2G33210 HSP60-2 heat shock protein 60-2	74
AT3G23990	AT3G23990 HSP60, HSP60-3B heat shock protein 60	74
AT4G24280	AT4G24280 cpHsc70-1 chloroplast heat shock protein 70-1	74
AT2G13560	AT2G13560 NAD-ME1 NAD-dependent malic enzyme 1	74
AT2G43650	AT2G43650 EMB2777 Sas10/U3 ribonucleoprotein (Utp) family protein	74
AT1G29310	AT1G29310 SecY protein transport family protein	73
AT3G25860	AT3G25860 LTA2, PLE2 2-oxoacid dehydrogenases acyltransferase family protein	73
AT3G45780	AT3G45780 PHOT1, NPH1, JK224, RPT1 phototropin 1	73
AT1G21750	AT1G21750 ATPDIL1-1, ATPDI5, PDI5, PDIL1-1 PDI-like 1-1	72
AT5G23120	AT5G23120 HCF136 photosystem II stability/assembly factor, chloroplast (HCF136)	72
AT5G56130	AT5G56130 TEX1, AtTEX1, THO3 Transducin/WD40 repeat-like superfamily protein	72
AT2G18740	AT2G18740 Small nuclear ribonucleoprotein family protein	71
AT3G07030	AT3G07030 Alba DNA/RNA-binding protein	71
AT4G33070	AT4G33070 Thiamine pyrophosphate dependent pyruvate decarboxylase family protein	71
AT4G18100	AT4G18100 Ribosomal protein L32e	71
AT3G46740	AT3G46740 TOC75-III, MAR1 translocon at the outer envelope membrane of chloroplasts 75-III	71
AT5G55070	AT5G55070 Dihydrolipoamide succinyltransferase	70
AT3G19760	AT3G19760 EIF4A-III eukaryotic initiation factor 4A-III	70
AT2G18510	AT2G18510 emb2444 RNA-binding (RRM/RBD/RNP motifs) family protein	70
AT1G74270	AT1G74270 Ribosomal protein L35Ae family protein	70
AT1G74010	AT1G74010 Calcium-dependent phosphotriesterase superfamily protein	70
AT4G39520	AT4G39520 GTP-binding protein-related	70
AT1G30630	AT1G30630 Coatomer epsilon subunit	69
AT1G33790	AT1G33790 jacalin lectin family protein	69
AT4G16720	AT4G16720 Ribosomal protein L23/L15e family protein	69
AT3G08030	AT3G08030 Protein of unknown function, DUF642	68
AT3G61440	AT3G61440 ATCYSC1, ARATH;BSAS3;1, CYSC1 cysteine synthase C1	68
AT1G42970	AT1G42970 GAPB glyceraldehyde-3-phosphate dehydrogenase B subunit	68
AT1G20575	AT1G20575 Nucleotide-diphospho-sugar transferases superfamily protein	68
AT4G35785	AT4G35785 RNA-binding (RRM/RBD/RNP motifs) family protein	68
AT4G28440	AT4G28440 Nucleic acid-binding, OB-fold-like protein	67
AT4G33360	AT4G33360 FLDH NAD(P)-binding Rossmann-fold superfamily protein	67
AT1G71220	AT1G71220 EBS1 UDP-glucose:glycoprotein glucosyltransferases;transferases, transferring hexosyl groups;transferases, transferring glycosyl groups	67
AT4G38630	AT4G38630 RPN10, MCB1, ATMCB1, MBP1 regulatory particle non-ATPase 10	67
AT4G11420	AT4G11420 EIF3A, ATEIF3A-1, EIF3A-1, ATTIF3A1, TIF3A1 eukaryotic translation initiation factor 3A	67
AT1G08480	AT1G08480 unknown protein	67
AT3G22845	AT3G22845 emp24/gp25L/p24 family/GOLD family protein	67
AT5G47930	AT5G47930 Zinc-binding ribosomal protein family protein	67
AT4G23850	AT4G23850 LACS4 AMP-dependent synthetase and ligase family protein	66
ATMG00510	ATMG00510 NAD7 NADH dehydrogenase subunit 7	66
AT1G20020	AT1G20020 ATLFNR2, FNR2 ferredoxin-NADP(+)-oxidoreductase 2	66
AT2G45470	AT2G45470 FLA8, AGP8 FASCICLIN-like arabinogalactan protein 8	66
AT2G45710	AT2G45710 Zinc-binding ribosomal protein family protein	66
AT1G09590	AT1G09590 collapsed_with_AT1G09690	65
AT5G11170	AT5G11170 DEAD/DEAH box RNA helicase family protein	65
AT1G31730	AT1G31730 Adaptin family protein	65
AT4G11060	AT4G11060 MTSSB mitochondrially targeted single-stranded DNA binding protein	65
AT3G20250	AT3G20250 APUM5, PUM5 pumilio 5	64
AT3G11710	AT3G11710 ATKRS-1 lysyl-tRNA synthetase 1	64
AT1G48610	AT1G48610 AT hook motif-containing protein	64
AT3G15950	AT3G15950 NAI2 DNA topoisomerase-related	64
AT3G06810	AT3G06810 IBR3 acyl-CoA dehydrogenase-related	64
AT3G18790	AT3G18790	64
AT1G10580	AT1G10580 Transducin/WD40 repeat-like superfamily protein	63
AT2G21660	AT2G21660 ATGRP7, CCR2, GR-RBP7, GRP7 cold, circadian rhythm, and rna binding 2	63
AT1G52760	AT1G52760 LysoPL2 lysophospholipase 2	63
AT1G06700	AT1G06700 Protein kinase superfamily protein	63
AT1G72160	AT1G72160 Sec14p-like phosphatidylinositol transfer family protein	63
AT5G25754	AT5G25754 collapsed_with_AT5G25757	63
AT1G29250	AT1G29250 Alba DNA/RNA-binding protein	62
AT5G19950	AT5G19950 Domain of unknown function (DUF1767)	62
AT2G23170	AT2G23170 GH3 Auxin-responsive GH3 family protein	62
AT4G33010	AT4G33010 AtGLDP1, GLDP1 glycine decarboxylase P-protein 1	62
AT3G42050	AT3G42050 vacuolar ATP synthase subunit H family protein	62
AT1G66530	AT1G66530 Arginyl-tRNA synthetase, class Ic	62
AT5G60640	AT5G60640 ATPDIL1-4, PDI2, ATPDI2, PDIL1-4 PDI-like 1-4	61
AT5G43960	AT5G43960 Nuclear transport factor 2 (NTF2) family protein with RNA binding (RRM-RBD-RNP motifs) domain	61
AT4G16340	AT4G16340 SPK1 guanyl-nucleotide exchange factors;GTPase binding;GTP binding	61
ATMG00640	ATMG00640 ORF25 hydrogen ion transporting ATP synthases, rotational mechanism;zinc ion binding	61
AT1G27950	AT1G27950 LTPG1 glycosylphosphatidylinositol-anchored lipid protein transfer 1	61
AT1G19880	AT1G19880 Regulator of chromosome condensation (RCC1) family protein	61
AT1G62480	AT1G62480 Vacuolar calcium-binding protein-related	61
AT4G27450	AT4G27450 Aluminium induced protein with YGL and LRDR motifs	60
AT1G09640	AT1G09640 Translation elongation factor EF1B, gamma chain	60
AT5G51660	AT5G51660 CPSF160, ATCPSF160 cleavage and polyadenylation specificity factor 160	60
AT4G34660	AT4G34660 SH3 domain-containing protein	60
AT1G02520	AT1G02520 PGP11 P-glycoprotein 11	60
AT4G16155	AT4G16155 dihydrolipoyl dehydrogenases	60
AT5G13780	AT5G13780 Acyl-CoA N-acyltransferases (NAT) superfamily protein	60
AT5G15550	AT5G15550 Transducin/WD40 repeat-like superfamily protein	59
AT2G31390	AT2G31390 pfkB-like carbohydrate kinase family protein	59
AT3G08640	AT3G08640 Protein of unknown function (DUF3411)	59
ATCG00280	ATCG00280 PSBC photosystem II reaction center protein C	59
AT1G47550	AT1G47550 SEC3A exocyst complex component sec3A	58
AT5G18410	AT5G18410 PIR, KLK, PIR121, SRA1, PIRP, ATSRA1 transcription activators	58
AT3G52140	AT3G52140 tetratricopeptide repeat (TPR)-containing protein	57
AT3G49120	AT3G49120 ATPERX34, PERX34, PRXCB, ATPCB, PRX34 peroxidase CB	57
AT4G13180	AT4G13180 NAD(P)-binding Rossmann-fold superfamily protein	57
AT3G48870	AT3G48870 ATCLPC, ATHSP93-III, HSP93-III Clp ATPase	57
AT3G17440	AT3G17440 NPSN13, ATNPSN13 novel plant snare 13	57
AT1G53750	AT1G53750 RPT1A regulatory particle triple-A 1A	56
AT1G80930	AT1G80930 MIF4G domain-containing protein / MA3 domain-containing protein	56
AT4G38220	AT4G38220 Peptidase M20/M25/M40 family protein	56
AT3G63400	AT3G63400 Cyclophilin-like peptidyl-prolyl cis-trans isomerase family protein	56
AT4G37930	AT4G37930 SHM1, STM, SHMT1 serine transhydroxymethyltransferase 1	56
AT4G00250	AT4G00250 DNA-binding storekeeper protein-related transcriptional regulator	56
AT4G21280	AT4G21280 PSBQ, PSBQA, PSBQ-1 photosystem II subunit QA	56
AT4G38600	AT4G38600 KAK, UPL3 HEAT repeat ;HECT-domain (ubiquitin-transferase)	56
AT5G14030	AT5G14030 translocon-associated protein beta (TRAPB) family protein	56
AT3G20370	AT3G20370 TRAF-like family protein	55
AT3G13790	AT3G13790 ATCWINV1, ATBFRUCT1 Glycosyl hydrolases family 32 protein	55
AT5G23630	AT5G23630 PDR2, MIA phosphate deficiency response 2	55
AT1G48030	AT1G48030 mtLPD1 mitochondrial lipoamide dehydrogenase 1	55
AT3G18740	AT3G18740 Ribosomal protein L7Ae/L30e/S12e/Gadd45 family protein	55
AT4G25320	AT4G25320 AT hook motif DNA-binding family protein	55
AT1G22200	AT1G22200 Endoplasmic reticulum vesicle transporter protein	55
AT2G32920	AT2G32920 ATPDIL2-3, PDI9, ATPDI9, PDIL2-3 PDI-like 2-3	55
AT4G23180	AT4G23180 CRK10, RLK4 cysteine-rich RLK (RECEPTOR-like protein kinase) 10	55
AT4G34450	AT4G34450 coatomer gamma-2 subunit, putative / gamma-2 coat protein, putative / gamma-2 COP, putative	54
AT5G45620	AT5G45620 Proteasome component (PCI) domain protein	54
AT1G74230	AT1G74230 GR-RBP5 glycine-rich RNA-binding protein 5	54
AT5G13110	AT5G13110 G6PD2 glucose-6-phosphate dehydrogenase 2	54
AT3G23600	AT3G23600 alpha/beta-Hydrolases superfamily protein	54
AT2G20260	AT2G20260 PSAE-2 photosystem I subunit E-2	54
AT1G20950	AT1G20950 Phosphofructokinase family protein	54
AT1G69840	AT1G69840 SPFH/Band 7/PHB domain-containing membrane-associated protein family	54
AT5G16590	AT5G16590 LRR1 Leucine-rich repeat protein kinase family protein	54
AT3G53740	AT3G53740 Ribosomal protein L36e family protein	53
AT4G08950	AT4G08950 EXO Phosphate-responsive 1 family protein	53
AT3G16640	AT3G16640 TCTP translationally controlled tumor protein	53
AT1G67680	AT1G67680 SRP72 RNA-binding domain	53
AT3G25530	AT3G25530 GHBDH, ATGHBDH, GLYR1, GR1 glyoxylate reductase 1	53
AT4G17140	AT4G17140 pleckstrin homology (PH) domain-containing protein	53
AT4G17520	AT4G17520 Hyaluronan / mRNA binding family	53
AT5G10480	AT5G10480 PAS2 Protein-tyrosine phosphatase-like, PTPLA	53
AT5G33320	AT5G33320 CUE1, PPT, ARAPPT Glucose-6-phosphate/phosphate translocator-related	53
AT3G07110	AT3G07110 Ribosomal protein L13 family protein	52
AT1G24360	AT1G24360 NAD(P)-binding Rossmann-fold superfamily protein	52
AT4G10710	AT4G10710 SPT16 global transcription factor C	52
AT1G55310	AT1G55310 SR33, SCL33, At-SCL33 SC35-like splicing factor 33	51
AT5G26260	AT5G26260 TRAF-like family protein	51
AT1G13320	AT1G13320 PP2AA3 protein phosphatase 2A subunit A3	51
AT2G21330	AT2G21330 FBA1 fructose-bisphosphate aldolase 1	51
AT3G63140	AT3G63140 CSP41A chloroplast stem-loop binding protein of 41 kDa	51
AT4G02450	AT4G02450 HSP20-like chaperones superfamily protein	51
AT5G10840	AT5G10840 Endomembrane protein 70 protein family	51
ATCG00580	ATCG00580 PSBE photosystem II reaction center protein E	51
AT1G09200	AT1G09200 collapsed_with_AT3G27360_AT5G10390_AT5G10400_AT5G65360	50
AT5G13260	AT5G13260 unknown protein	50
AT2G30870	AT2G30870 ATGSTF10, ERD13, ATGSTF4, GSTF10 glutathione S-transferase PHI 10	50
AT5G46430	AT5G46430 Ribosomal protein L32e	50
AT1G59610	AT1G59610 ADL3, CF1, DRP2B, DL3 dynamin-like 3	50
AT1G79200	AT1G79200 unknown protein	50
AT2G02560	AT2G02560 CAND1, ATCAND1, ETA2, TIP120, HVE cullin-associated and neddylation dissociated	50
AT2G41475	AT2G41475 Embryo-specific protein 3, (ATS3)	49
AT2G43950	AT2G43950 OEP37, ATOEP37 chloroplast outer envelope protein 37	49
AT4G39680	AT4G39680 SAP domain-containing protein	49
AT3G44110	AT3G44110 ATJ3, ATJ DNAJ homologue 3	49
AT3G44380	AT3G44380 Late embryogenesis abundant (LEA) hydroxyproline-rich glycoprotein family	49
AT3G52960	AT3G52960 Thioredoxin superfamily protein	49
AT4G29130	AT4G29130 ATHXK1, GIN2, HXK1 hexokinase 1	49
AT4G33370	AT4G33370 DEA(D/H)-box RNA helicase family protein	49
AT5G19960	AT5G19960 RNA-binding (RRM/RBD/RNP motifs) family protein	49
AT3G21140	AT3G21140 Pyridoxamine 5~-phosphate oxidase family protein	48
AT3G17240	AT3G17240 mtLPD2 lipoamide dehydrogenase 2	48
AT5G27770	AT5G27770 Ribosomal L22e protein family	48
AT1G30230	AT1G30230 Glutathione S-transferase, C-terminal-like;Translation elongation factor EF1B/ribosomal protein S6	48
AT1G01620	AT1G01620 PIP1C, TMP-B, PIP1;3 plasma membrane intrinsic protein 1C	48
AT4G24550	AT4G24550 Clathrin adaptor complexes medium subunit family protein	48
AT4G28990	AT4G28990 RNA-binding protein-related	48
AT1G06960	AT1G06960 RNA-binding (RRM/RBD/RNP motifs) family protein	47
AT2G39390	AT2G39390 Ribosomal L29 family protein	47
AT5G42980	AT5G42980 ATTRX3, ATH3, ATTRXH3, TRXH3, TRX3 thioredoxin 3	47
AT4G11380	AT4G11380 Adaptin family protein	47
AT2G09990	AT2G09990 Ribosomal protein S5 domain 2-like superfamily protein	47
AT1G17650	AT1G17650 GLYR2, GR2 glyoxylate reductase 2	47
AT3G52190	AT3G52190 PHF1 phosphate transporter traffic facilitator1	47
AT5G27540	AT5G27540 MIRO1, emb2473 MIRO-related GTP-ase 1	47
AT5G22650	AT5G22650 HD2B, HDT02, HDT2, ATHD2B, HDA4, HD2, ATHD2 histone deacetylase 2B	46
AT1G48830	AT1G48830 Ribosomal protein S7e family protein	46
AT5G09510	AT5G09510 Ribosomal protein S19 family protein	46
AT1G17290	AT1G17290 AlaAT1 alanine aminotransferas	46
AT2G17850	AT2G17850 Rhodanese/Cell cycle control phosphatase superfamily protein	46
AT1G65270	AT1G65270 unknown protein	46
AT2G38750	AT2G38750 ANNAT4 annexin 4	46
AT3G60950	AT3G60950 C2 calcium/lipid-binding endonuclease/exonuclease/phosphatase	46
AT4G24340	AT4G24340 Phosphorylase superfamily protein	46
AT2G31810	AT2G31810 ACT domain-containing small subunit of acetolactate synthase protein	45
AT4G09000	AT4G09000 GRF1, GF14 CHI general regulatory factor 1	45
AT2G37170	AT2G37170 PIP2B, PIP2;2 plasma membrane intrinsic protein 2	45
AT1G03870	AT1G03870 FLA9 FASCICLIN-like arabinoogalactan 9	45
AT1G18660	AT1G18660 zinc finger (C3HC4-type RING finger) family protein	45
AT4G31880	AT4G31880	45
AT4G39730	AT4G39730 Lipase/lipooxygenase, PLAT/LH2 family protein	45
AT5G66420	AT5G66420	45
AT1G55850	AT1G55850 ATCSLE1, CSLE1 cellulose synthase like E1	44
AT4G10750	AT4G10750 Phosphoenolpyruvate carboxylase family protein	44
AT4G34230	AT4G34230 CAD5, ATCAD5, CAD-5 cinnamyl alcohol dehydrogenase 5	44
AT5G55610	AT5G55610 unknown protein	44
AT4G29350	AT4G29350 PFN2, PRO2, PRF2 profilin 2	44
AT4G21450	AT4G21450 PapD-like superfamily protein	44
AT4G37640	AT4G37640 ACA2 calcium ATPase 2	44
AT5G01650	AT5G01650 Tautomerase/MIF superfamily protein	44
AT5G49810	AT5G49810 MMT methionine S-methyltransferase	44
AT1G54000	AT1G54000 GDSL-like Lipase/Acylhydrolase superfamily protein	43
AT3G05560	AT3G05560 Ribosomal L22e protein family	43
AT3G62530	AT3G62530 ARM repeat superfamily protein	43
AT1G14410	AT1G14410 ATWHY1, PTAC1, WHY1 ssDNA-binding transcriptional regulator	43
AT1G64790	AT1G64790 ILA ILITYHIA	43
AT1G52230	AT1G52230 PSAH2, PSAH-2, PSI-H photosystem I subunit H2	43
AT1G53210	AT1G53210 sodium/calcium exchanger family protein / calcium-binding EF hand family protein	43
AT2G14720	AT2G14720 VSR4, VSR2;1, BP80-2;1, MTV4 vacuolar sorting receptor 4	43
AT3G11630	AT3G11630 Thioredoxin superfamily protein	43
AT3G51460	AT3G51460 RHD4 Phosphoinositide phosphatase family protein	43
AT5G59180	AT5G59180 NRPB7 DNA-directed RNA polymerase II	43
AT5G41770	AT5G41770 crooked neck protein, putative / cell cycle protein, putative	42
AT3G02080	AT3G02080 Ribosomal protein S19e family protein	42
AT3G54860	AT3G54860 ATVPS33, VPS33 Sec1/munc18-like (SM) proteins superfamily	42
AT1G52400	AT1G52400 BGL1, BGLU18, ATBG1 beta glucosidase 18	42
AT5G11920	AT5G11920 AtcwINV6, cwINV6 6-&1-fructan exohydrolase	42
AT5G06140	AT5G06140 SNX1, ATSNX1 sorting nexin 1	42
AT1G80410	AT1G80410 EMB2753 tetratricopeptide repeat (TPR)-containing protein	42
AT2G32600	AT2G32600 hydroxyproline-rich glycoprotein family protein	42
AT2G39010	AT2G39010 PIP2E, PIP2;6 plasma membrane intrinsic protein 2E	42
AT3G13650	AT3G13650 Disease resistance-responsive (dirigent-like protein) family protein	42
AT3G57330	AT3G57330 ACA11 autoinhibited Ca2+-ATPase 11	42
AT5G06320	AT5G06320 NHL3 NDR1/HIN1-like 3	42
AT5G63610	AT5G63610 HEN3, CDKE;1, ATCDK8 cyclin-dependent kinase E;1	42
AT2G40510	AT2G40510 Ribosomal protein S26e family protein	41
AT1G44350	AT1G44350 ILL6 IAA-leucine resistant (ILR)-like gene 6	41
AT3G03270	AT3G03270 Adenine nucleotide alpha hydrolases-like superfamily protein	41
AT2G16940	AT2G16940 Splicing factor, CC1-like	41
AT3G16110	AT3G16110 ATPDIL1-6, ATPDI4, PDI4, PDIL1-6 PDI-like 1-6	41
AT1G32210	AT1G32210 ATDAD1 Defender against death (DAD family) protein	41
AT2G27720	AT2G27720 60S acidic ribosomal protein family	41
AT2G32000	AT2G32000 DNA topoisomerase, type IA, core	41
AT3G23175	AT3G23175 HR-like lesion-inducing protein-related	41
AT3G23400	AT3G23400 FIB4 Plastid-lipid associated protein PAP / fibrillin family protein	41
AT4G12600	AT4G12600 Ribosomal protein L7Ae/L30e/S12e/Gadd45 family protein	41
AT1G73720	AT1G73720 SMU1 transducin family protein / WD-40 repeat family protein	40
AT1G67730	AT1G67730 YBR159, KCR1, ATKCR1 beta-ketoacyl reductase 1	40
AT1G54990	AT1G54990 AXR4, RGR, RGR1 alpha/beta-Hydrolases superfamily protein	40
AT5G50850	AT5G50850 MAB1 Transketolase family protein	40
AT1G11910	AT1G11910 APA1, ATAPA1 aspartic proteinase A1	40
AT1G78510	AT1G78510 SPS1 solanesyl diphosphate synthase 1	40
AT2G07690	AT2G07690 MCM5 Minichromosome maintenance (MCM2/3/5) family protein	40
AT3G19340	AT3G19340 Protein of unknown function (DUF3754)	40
AT3G56990	AT3G56990 EDA7 embryo sac development arrest 7	40
AT4G15760	AT4G15760 MO1 monooxygenase 1	40
AT4G31180	AT4G31180 Class II aminoacyl-tRNA and biotin synthetases superfamily protein	40
ATCG00500	ATCG00500 ACCD acetyl-CoA carboxylase carboxyl transferase subunit beta	40
AT3G20550	AT3G20550 DDL SMAD/FHA domain-containing protein	39
AT1G02780	AT1G02780 emb2386 Ribosomal protein L19e family protein	39
AT1G57720	AT1G57720 Translation elongation factor EF1B, gamma chain	39
AT3G22320	AT3G22320 ATRPABC24, RPB5A, NRPB5, NRPD5 Eukaryotic rpb5 RNA polymerase subunit family protein	39
AT3G55360	AT3G55360 CER10, ECR, ATTSC13, TSC13 3-oxo-5-alpha-steroid 4-dehydrogenase family protein	39
AT1G55900	AT1G55900 TIM50, emb1860 Haloacid dehalogenase-like hydrolase (HAD) superfamily protein	39
AT2G22170	AT2G22170 Lipase/lipooxygenase, PLAT/LH2 family protein	39
AT2G29700	AT2G29700 ATPH1, PH1 pleckstrin homologue 1	39
AT3G11400	AT3G11400 EIF3G1, ATEIF3G1 eukaryotic translation initiation factor 3G1	39
AT3G16850	AT3G16850 Pectin lyase-like superfamily protein	39
AT3G02875	AT3G02875 ILR1 Peptidase M20/M25/M40 family protein	39
AT2G19750	AT2G19750 collapsed_with_AT4G29390_AT5G56670	38
AT5G04560	AT5G04560 DME HhH-GPD base excision DNA repair family protein	38
AT2G21620	AT2G21620 RD2 Adenine nucleotide alpha hydrolases-like superfamily protein	38
AT1G12310	AT1G12310 Calcium-binding EF-hand family protein	38
AT1G27770	AT1G27770 ACA1, PEA1 autoinhibited Ca2+-ATPase 1	38
AT2G22360	AT2G22360 DNAJ heat shock family protein	38
AT4G12080	AT4G12080 AHL1, ATAHL1 AT-hook motif nuclear-localized protein 1	38
AT5G07300	AT5G07300 BON2 Calcium-dependent phospholipid-binding Copine family protein	38
AT5G60790	AT5G60790 ATGCN1, GCN1 ABC transporter family protein	38
AT1G66260	AT1G66260 RNA-binding (RRM/RBD/RNP motifs) family protein	37
AT3G25840	AT3G25840 Protein kinase superfamily protein	37
AT3G43980	AT3G43980 collapsed_with_AT3G44010_AT4G33865	37
AT1G78850	AT1G78850 D-mannose binding lectin protein with Apple-like carbohydrate-binding domain	37
AT3G01090	AT3G01090 AKIN10, KIN10 SNF1 kinase homolog 10	37
AT1G43670	AT1G43670 Inositol monophosphatase family protein	37
AT4G33120	AT4G33120 S-adenosyl-L-methionine-dependent methyltransferases superfamily protein	37
AT5G16290	AT5G16290 VAT1 VALINE-TOLERANT 1	37
AT2G21410	AT2G21410 VHA-A2 vacuolar proton ATPase A2	36
AT3G29090	AT3G29090 PME31, ATPME31 pectin methylesterase 31	36
AT3G06650	AT3G06650 ACLB-1 ATP-citrate lyase B-1	36
AT3G05970	AT3G05970 LACS6, ATLACS6 long-chain acyl-CoA synthetase 6	36
AT4G05180	AT4G05180 PSBQ, PSBQ-2, PSII-Q photosystem II subunit Q-2	36
AT4G14990	AT4G14990 Topoisomerase II-associated protein PAT1	36
AT4G30890	AT4G30890 UBP24 ubiquitin-specific protease 24	36
AT5G37510	AT5G37510 EMB1467, CI76 NADH-ubiquinone dehydrogenase, mitochondrial, putative	36
AT5G46290	AT5G46290 KASI 3-ketoacyl-acyl carrier protein synthase I	36
AT3G02560	AT3G02560 Ribosomal protein S7e family protein	35
AT3G48560	AT3G48560 CSR1, ALS, AHAS, TZP5, IMR1 chlorsulfuron/imidazolinone resistant 1	35
AT1G76300	AT1G76300 SmD3 snRNP core protein SMD3	35
AT5G16130	AT5G16130 Ribosomal protein S7e family protein	35
AT2G42800	AT2G42800 AtRLP29, RLP29 receptor like protein 29	35
AT3G06530	AT3G06530 ARM repeat superfamily protein	35
AT3G23940	AT3G23940 dehydratase family	35
AT3G27190	AT3G27190 UKL2 uridine kinase-like 2	35
AT3G61650	AT3G61650 TUBG1 gamma-tubulin	35
AT4G12730	AT4G12730 FLA2 FASCICLIN-like arabinogalactan 2	35
AT5G02310	AT5G02310 PRT6 proteolysis 6	35
AT1G63940	AT1G63940 MDAR6 monodehydroascorbate reductase 6	34
AT1G12920	AT1G12920 ERF1-2 eukaryotic release factor 1-2	34
AT1G02370	AT1G02370 Tetratricopeptide repeat (TPR)-like superfamily protein	34
AT1G14620	AT1G14620 DECOY decoy	34
AT2G31360	AT2G31360 ADS2, DS2 16:0delta9 desaturase 2	34
AT2G35920	AT2G35920 RNA helicase family protein	34
AT4G00570	AT4G00570 NAD-ME2 NAD-dependent malic enzyme 2	34
AT5G06830	AT5G06830 unknown protein	34
AT5G35630	AT5G35630 GS2, GLN2, ATGSL1 glutamine synthetase 2	34
AT5G64040	AT5G64040 PSAN photosystem I reaction center subunit PSI-N, chloroplast, putative / PSI-N, putative (PSAN)	34
AT5G57460	AT5G57460 unknown protein	33
AT2G27100	AT2G27100 SE C2H2 zinc-finger protein SERRATE (SE)	33
AT3G52880	AT3G52880 ATMDAR1, MDAR1 monodehydroascorbate reductase 1	33
AT5G04590	AT5G04590 SIR sulfite reductase	33
AT3G05900	AT3G05900 neurofilament protein-related	33
AT4G23650	AT4G23650 CDPK6, CPK3 calcium-dependent protein kinase 6	33
AT3G25920	AT3G25920 RPL15 ribosomal protein L15	33
AT1G72750	AT1G72750 ATTIM23-2, TIM23-2 translocase inner membrane subunit 23-2	33
AT3G27830	AT3G27830 RPL12-A, RPL12 ribosomal protein L12-A	33
AT3G29160	AT3G29160 AKIN11, SNRK1, KIN11, ATKIN11 SNF1 kinase homolog 11	33
AT5G27600	AT5G27600 LACS7, ATLACS7 long-chain acyl-CoA synthetase 7	33
AT2G35110	AT2G35110 GRL, NAP1, NAPP transcription activators	33
AT5G63620	AT5G63620 GroES-like zinc-binding alcohol dehydrogenase family protein	32
AT1G10430	AT1G10430 PP2A-2 protein phosphatase 2A-2	32
AT1G08190	AT1G08190 ATVPS41, ZIP2, VPS41, ATVAM2, VAM2 vacuolar protein sorting 41	32
AT4G23630	AT4G23630 BTI1, RTNLB1 VIRB2-interacting protein 1	32
AT4G27690	AT4G27690 VPS26B vacuolar protein sorting 26B	32
AT5G54810	AT5G54810 TSB1, TRPB, TRP2, ATTSB1 tryptophan synthase beta-subunit 1	32
AT2G37340	AT2G37340 RSZ33, ATRSZ33, RS2Z33, AT-RS2Z33 arginine/serine-rich zinc knuckle-containing protein 33	31
AT1G48920	AT1G48920 ATNUC-L1, PARL1, NUC-L1 nucleolin like 1	31
AT1G20620	AT1G20620 CAT3, SEN2, ATCAT3 catalase 3	31
AT1G78380	AT1G78380 ATGSTU19, GST8, GSTU19 glutathione S-transferase TAU 19	31
AT1G53850	AT1G53850 PAE1, ATPAE1 20S proteasome alpha subunit E1	31
AT1G45145	AT1G45145 ATTRX5, ATH5, LIV1, TRX5 thioredoxin H-type 5	31
AT4G29410	AT4G29410 Ribosomal L28e protein family	31
AT4G24830	AT4G24830 arginosuccinate synthase family	31
AT1G65220	AT1G65220 ARM repeat superfamily protein	31
AT3G02200	AT3G02200 Proteasome component (PCI) domain protein	31
AT3G03520	AT3G03520 NPC3 non-specific phospholipase C3	31
AT4G33090	AT4G33090 APM1, ATAPM1 aminopeptidase M1	31
AT5G65020	AT5G65020 ANNAT2 annexin 2	30
AT1G64650	AT1G64650 Major facilitator superfamily protein	30
AT1G29965	AT1G29965 Ribosomal protein L18ae/LX family protein	30
AT1G16350	AT1G16350 Aldolase-type TIM barrel family protein	30
AT2G20800	AT2G20800 NDB4 NAD(P)H dehydrogenase B4	30
AT5G19690	AT5G19690 STT3A staurosporin and temperature sensitive 3-like A	30
AT1G09740	AT1G09740 Adenine nucleotide alpha hydrolases-like superfamily protein	30
AT1G23460	AT1G23460 Pectin lyase-like superfamily protein	30
AT1G53880	AT1G53880 collapsed_with_AT1G53900	30
AT2G22230	AT2G22230 Thioesterase superfamily protein	30
AT2G44060	AT2G44060 Late embryogenesis abundant protein, group 2	30
AT2G01470	AT2G01470 STL2P, ATSEC12 SEC12P-like 2 protein	30
AT5G17440	AT5G17440 LUC7 related protein	29
AT1G01490	AT1G01490 Heavy metal transport/detoxification superfamily protein	29
AT3G03960	AT3G03960 TCP-1/cpn60 chaperonin family protein	29
AT2G38670	AT2G38670 PECT1 phosphorylethanolamine cytidylyltransferase 1	29
AT2G37230	AT2G37230 Tetratricopeptide repeat (TPR)-like superfamily protein	29
AT2G33040	AT2G33040 ATP3 gamma subunit of Mt ATP synthase	29
AT1G12470	AT1G12470 zinc ion binding	29
AT1G69220	AT1G69220 SIK1 Protein kinase superfamily protein	29
AT2G38040	AT2G38040 CAC3 acetyl Co-enzyme a carboxylase carboxyltransferase alpha subunit	29
AT4G03430	AT4G03430 STA1, EMB2770 pre-mRNA splicing factor-related	29
AT4G21520	AT4G21520 Transducin/WD40 repeat-like superfamily protein	29
AT4G26570	AT4G26570 ATCBL3, CBL3 calcineurin B-like 3	29
AT5G10160	AT5G10160 Thioesterase superfamily protein	29
AT1G15200	AT1G15200 protein-protein interaction regulator family protein	28
AT3G53500	AT3G53500 RSZ32, RS2Z32, At-RS2Z RNA-binding (RRM/RBD/RNP motifs) family protein with retrovirus zinc finger-like domain	28
AT1G51040	AT1G51040 Protein kinase superfamily protein	28
AT3G54110	AT3G54110 ATPUMP1, UCP, PUMP1, ATUCP1, UCP1 plant uncoupling mitochondrial protein 1	28
AT5G42960	AT5G42960 unknown protein	28
AT1G09850	AT1G09850 XBCP3 xylem bark cysteine peptidase 3	28
AT1G16470	AT1G16470 PAB1 proteasome subunit PAB1	28
AT2G44710	AT2G44710 RNA-binding (RRM/RBD/RNP motifs) family protein	28
AT3G13940	AT3G13940 DNA binding;DNA-directed RNA polymerases	28
AT3G52200	AT3G52200 LTA3 Dihydrolipoamide acetyltransferase, long form protein	28
AT1G67560	AT1G67560 LOX6 PLAT/LH2 domain-containing lipoxygenase family protein	28
AT5G13530	AT5G13530 KEG protein kinases;ubiquitin-protein ligases	27
AT5G50320	AT5G50320 ELO3, HAG3, HAC8, ELP3, AtELP3 radical SAM domain-containing protein / GCN5-related N-acetyltransferase (GNAT) family protein	27
AT1G43170	AT1G43170 ARP1, emb2207, RPL3A, RP1 ribosomal protein 1	27
AT5G06160	AT5G06160 ATO splicing factor-related	27
AT1G04750	AT1G04750 VAMP7B, VAMP721, ATVAMP721, AT VAMP7B vesicle-associated membrane protein 721	27
AT1G14510	AT1G14510 AL7 alfin-like 7	27
AT5G58270	AT5G58270 STA1, ATATM3, ATM3 ABC transporter of the mitochondrion 3	27
AT1G79920	AT1G79920 Heat shock protein 70 (Hsp 70) family protein	27
AT1G10840	AT1G10840 TIF3H1 translation initiation factor 3 subunit H1	27
AT1G21700	AT1G21700 ATSWI3C, CHB4, SWI3C SWITCH/sucrose nonfermenting 3C	27
AT2G34040	AT2G34040 Apoptosis inhibitory protein 5 (API5)	27
AT4G11850	AT4G11850 PLDGAMMA1, MEE54 phospholipase D gamma 1	27
AT1G49780	AT1G49780 PUB26 plant U-box 26	26
AT4G11150	AT4G11150 TUF, emb2448, TUFF, VHA-E1 vacuolar ATP synthase subunit E1	26
AT2G43460	AT2G43460 collapsed_with_AT3G59540	26
AT1G56450	AT1G56450 PBG1 20S proteasome beta subunit G1	26
AT2G37435	AT2G37435 Cystatin/monellin superfamily protein	26
AT5G65460	AT5G65460 KCA2, KAC2 kinesin like protein for actin based chloroplast movement 2	26
AT2G44640	AT2G44640	26
ATCG00790	ATCG00790 RPL16 ribosomal protein L16	26
AT1G20440	AT1G20440 COR47, RD17, AtCOR47 cold-regulated 47	26
AT1G48440	AT1G48440 B-cell receptor-associated 31-like	26
AT3G04570	AT3G04570 AHL19 AT-hook motif nuclear-localized protein 19	26
AT3G07180	AT3G07180 GPI transamidase component PIG-S-related	26
AT3G07570	AT3G07570 Cytochrome b561/ferric reductase transmembrane with DOMON related domain	26
AT5G44140	AT5G44140 ATPHB7, PHB7 prohibitin 7	26
AT1G51710	AT1G51710 UBP6, ATUBP6 ubiquitin-specific protease 6	25
AT2G38280	AT2G38280 FAC1, ATAMPD AMP deaminase, putative / myoadenylate deaminase, putative	25
AT3G20630	AT3G20630 UBP14, TTN6, ATUBP14, PER1 ubiquitin-specific protease 14	25
AT1G75660	AT1G75660 XRN3, AtXRN3 5~-3~ exoribonuclease 3	25
AT1G01740	AT1G01740 Protein kinase protein with tetratricopeptide repeat domain	25
AT1G04890	AT1G04890 Protein of unknown function, DUF593	25
AT1G07570	AT1G07570 APK1A Protein kinase superfamily protein	25
AT1G12840	AT1G12840 DET3, ATVHA-C vacuolar ATP synthase subunit C (VATC) / V-ATPase C subunit / vacuolar proton pump C subunit (DET3)	25
AT1G52930	AT1G52930 Ribosomal RNA processing Brix domain protein	25
AT1G56460	AT1G56460 HIT zinc finger ;PAPA-1-like conserved region	25
AT2G28900	AT2G28900 OEP16, ATOEP16-L, ATOEP16-1, OEP16-1 outer plastid envelope protein 16-1	25
AT2G36290	AT2G36290 alpha/beta-Hydrolases superfamily protein	25
AT4G12650	AT4G12650 Endomembrane protein 70 protein family	25
AT5G02710	AT5G02710 unknown protein	25
AT5G04430	AT5G04430 BTR1, BTR1L binding to TOMV RNA 1L (long form)	25
AT5G11240	AT5G11240 transducin family protein / WD-40 repeat family protein	25
AT5G63550	AT5G63550 DEK domain-containing chromatin associated protein	25
AT4G22380	AT4G22380 Ribosomal protein L7Ae/L30e/S12e/Gadd45 family protein	24
AT2G23930	AT2G23930 SNRNP-G probable small nuclear ribonucleoprotein G	24
AT5G20010	AT5G20010 RAN-1, RAN1, ATRAN1 RAS-related nuclear protein-1	24
AT1G12000	AT1G12000 Phosphofructokinase family protein	24
AT1G49760	AT1G49760 PAB8, PABP8 poly(A) binding protein 8	24
AT4G13770	AT4G13770 CYP83A1, REF2 cytochrome P450, family 83, subfamily A, polypeptide 1	24
AT1G06410	AT1G06410 ATTPS7, TPS7, ATTPSA trehalose-phosphatase/synthase 7	24
AT1G16870	AT1G16870 mitochondrial 28S ribosomal protein S29-related	24
AT1G62620	AT1G62620 Flavin-binding monooxygenase family protein	24
AT2G25210	AT2G25210 Ribosomal protein L39 family protein	24
AT4G10090	AT4G10090 ELP6 elongator protein 6	24
AT5G10410	AT5G10410 ENTH/ANTH/VHS superfamily protein	24
AT5G11490	AT5G11490 adaptin family protein	24
AT5G05470	AT5G05470 EIF2 ALPHA, ATEIF2-A2, EIF2-A2 eukaryotic translation initiation factor 2 alpha subunit	24
AT1G02970	AT1G02970 WEE1, ATWEE1 WEE1 kinase homolog	23
AT4G30330	AT4G30330 Small nuclear ribonucleoprotein family protein	23
AT3G09840	AT3G09840 CDC48, ATCDC48, CDC48A cell division cycle 48	23
AT1G43800	AT1G43800 Plant stearoyl-acyl-carrier-protein desaturase family protein	23
AT3G27960	AT3G27960 Tetratricopeptide repeat (TPR)-like superfamily protein	23
AT1G11680	AT1G11680 CYP51G1, EMB1738, CYP51A2, CYP51 CYTOCHROME P450 51G1	23
AT1G64550	AT1G64550 ATGCN3, GCN3 general control non-repressible 3	23
AT2G24360	AT2G24360 Protein kinase superfamily protein	23
AT2G38140	AT2G38140 PSRP4 plastid-specific ribosomal protein 4	23
AT2G41500	AT2G41500 LIS, EMB2776 WD-40 repeat family protein / small nuclear ribonucleoprotein Prp4p-related	23
AT2G47090	AT2G47090 zinc ion binding;nucleic acid binding	23
AT5G46280	AT5G46280 MCM3 Minichromosome maintenance (MCM2/3/5) family protein	23
AT4G27270	AT4G27270 Quinone reductase family protein	22
AT1G30580	AT1G30580 GTP binding	22
AT1G35680	AT1G35680 Ribosomal protein L21	22
AT1G34130	AT1G34130 STT3B staurosporin and temperature sensitive 3-like b	22
AT1G66410	AT1G66410 CAM4 calmodulin 4	22
AT2G38760	AT2G38760 ANNAT3, ANN3 annexin 3	22
AT2G39630	AT2G39630 Nucleotide-diphospho-sugar transferases superfamily protein	22
AT3G04600	AT3G04600 Nucleotidylyl transferase superfamily protein	22
AT3G18600	AT3G18600 P-loop containing nucleoside triphosphate hydrolases superfamily protein	22
AT3G63190	AT3G63190 RRF, HFP108, cpRRF, AtcpRRF ribosome recycling factor, chloroplast precursor	22
AT4G24770	AT4G24770 RBP31, ATRBP31, CP31, ATRBP33 31-kDa RNA binding protein	22
AT5G51410	AT5G51410 LUC7 N_terminus domain-containing protein	22
AT5G54270	AT5G54270 LHCB3, LHCB3*1 light-harvesting chlorophyll B-binding protein 3	22
AT5G60270	AT5G60270 Concanavalin A-like lectin protein kinase family protein	22
AT5G65720	AT5G65720 ATNIFS1, NIFS1, NFS1, ATNFS1 nitrogen fixation S (NIFS)-like 1	21
AT3G26990	AT3G26990 ENTH/VHS family protein	21
AT3G54670	AT3G54670 TTN8 Structural maintenance of chromosomes (SMC) family protein	21
AT1G19140	AT1G19140	21
AT2G40730	AT2G40730 Protein kinase family protein with ARM repeat domain	21
AT4G00900	AT4G00900 ECA2, ATECA2 ER-type Ca2+-ATPase 2	21
AT4G22970	AT4G22970 RSW4, AESP, ESP homolog of separase	21
AT4G25090	AT4G25090 Riboflavin synthase-like superfamily protein	21
AT5G51260	AT5G51260 HAD superfamily, subfamily IIIB acid phosphatase	21
AT5G56660	AT5G56660 ILL2 IAA-leucine resistant (ILR)-like 2	21
AT5G36970	AT5G36970 NHL25 NDR1/HIN1-like 25	20
AT5G44700	AT5G44700 EDA23, GSO2 Leucine-rich repeat transmembrane protein kinase	20
AT3G19480	AT3G19480 D-3-phosphoglycerate dehydrogenase	20
AT3G60190	AT3G60190 ADL4, ADLP2, EDR3, DRP1E, ADL1E, DL1E DYNAMIN-like 1E	20
AT4G32410	AT4G32410 CESA1, RSW1, AtCESA1 cellulose synthase 1	20
AT5G61770	AT5G61770 PPAN PETER PAN-like protein	20

## Sheet: IRX14 3
Mascot scores of anti-GFP immunoprecipitation
		IRX14-GFP 3
prot_acc	prot_desc	protein score
AT5G28540	AT5G28540 BIP1 heat shock protein 70 (Hsp 70) family protein	957
AT5G42020	AT5G42020 BIP, BIP2 Heat shock protein 70 (Hsp 70) family protein	953
AT4G36890	AT4G36890 IRX14	910
AT5G61840	AT5G61840 IRX10L	331
AT2G39460	AT2G39460 ATRPL23A, RPL23A, RPL23AA ribosomal protein L23AA	284
AT1G07920	AT1G07920 collapsed_with_AT1G07930_AT1G07940_AT5G60390	169
AT1G27600	AT1G27600 IRX9-L	169
AT3G10950	AT3G10950 Zinc-binding ribosomal protein family protein	156
AT2G18020	AT2G18020 EMB2296 Ribosomal protein L2 family	137
AT3G09200	AT3G09200 Ribosomal protein L10 family protein	137
AT3G24830	AT3G24830 Ribosomal protein L13 family protein	104
AT2G37190	AT2G37190 Ribosomal protein L11 family protein	101
AT5G24710	AT5G24710 Transducin/WD40 repeat-like superfamily protein	89
AT2G20450	AT2G20450 Ribosomal protein L14	87
AT1G03220	AT1G03220 Eukaryotic aspartyl protease family protein	79
AT5G09810	AT5G09810 ACT7 actin 7	77
AT3G20250	AT3G20250 APUM5, PUM5 pumilio 5	71
AT1G07790	AT1G07790 HTB1 Histone superfamily protein	70
AT5G52470	AT5G52470 FIB1, FBR1, ATFIB1, ATFBR1, SKIP7 fibrillarin 1	65
AT3G45030	AT3G45030 collapsed_with_AT5G62300	60
AT1G27400	AT1G27400 Ribosomal protein L22p/L17e family protein	59
AT2G42740	AT2G42740 RPL16A ribosomal protein large subunit 16A	56
AT3G08580	AT3G08580 AAC1 ADP/ATP carrier 1	50
AT1G27090	AT1G27090 glycine-rich protein	50
AT2G07640	AT2G07640 NAD(P)-binding Rossmann-fold superfamily protein	50
AT3G02090	AT3G02090 MPPBETA Insulinase (Peptidase family M16) protein	47
AT4G15000	AT4G15000 Ribosomal L27e protein family	47
AT3G57150	AT3G57150 NAP57, AtNAP57, CBF5, AtCBF5 homologue of NAP57	46
AT1G18080	AT1G18080 ATARCA, RACK1A_AT, RACK1A Transducin/WD40 repeat-like superfamily protein	46
AT2G07698	AT2G07698 ATPase, F1 complex, alpha subunit protein	43
AT4G19440	AT4G19440 Tetratricopeptide repeat (TPR)-like superfamily protein	43
AT1G72370	AT1G72370 P40, AP40, RP40, RPSAA 40s ribosomal protein SA	37
AT3G09530	AT3G09530 ATEXO70H3, EXO70H3 exocyst subunit exo70 family protein H3	37
AT2G36160	AT2G36160 Ribosomal protein S11 family protein	36
AT2G27530	AT2G27530 PGY1 Ribosomal protein L1p/L10e family	36
AT4G28440	AT4G28440 Nucleic acid-binding, OB-fold-like protein	36
AT5G66470	AT5G66470 RNA binding;GTP binding	36
AT1G13440	AT1G13440 GAPC-2, GAPC2 glyceraldehyde-3-phosphate dehydrogenase C2	35
AT5G26830	AT5G26830 Threonyl-tRNA synthetase	35
AT1G77120	AT1G77120 ADH1, ADH, ATADH, ATADH1 alcohol dehydrogenase 1	34
AT2G21580	AT2G21580 Ribosomal protein S25 family protein	34
AT2G31610	AT2G31610 Ribosomal protein S3 family protein	33
AT5G07350	AT5G07350 Tudor1, AtTudor1, TSN1 TUDOR-SN protein 1	33
AT1G11580	AT1G11580 ATPMEPCRA, PMEPCRA methylesterase PCR A	33
ATCG00490	ATCG00490 RBCL ribulose-bisphosphate carboxylases	32
AT1G02970	AT1G02970 WEE1, ATWEE1 WEE1 kinase homolog	31
AT1G10590	AT1G10590 Nucleic acid-binding, OB-fold-like protein	31
AT4G29830	AT4G29830 VIP3 Transducin/WD40 repeat-like superfamily protein	30
AT5G62050	AT5G62050 OXA1, ATOXA1, OXA1AT homolog of yeast oxidase assembly 1 (OXA1)	30
AT1G73720	AT1G73720 SMU1 transducin family protein / WD-40 repeat family protein	29
AT5G49880	AT5G49880 mitotic checkpoint family protein	28
AT1G55040	AT1G55040 zinc finger (Ran-binding) family protein	28
AT1G09200	AT1G09200 collapsed_with_AT3G27360_AT5G10390_AT5G10400_AT5G65360	28
AT2G18450	AT2G18450 SDH1-2 succinate dehydrogenase 1-2	28
AT4G02930	AT4G02930 GTP binding Elongation factor Tu family protein	27
AT1G49780	AT1G49780 PUB26 plant U-box 26	26
AT1G08880	AT1G08880 HTA5, H2AXA, G-H2AX, GAMMA-H2AX Histone superfamily protein	25
AT5G67500	AT5G67500 VDAC2 voltage dependent anion channel 2	25
AT5G35980	AT5G35980 YAK1 yeast YAK1-related gene 1	25
AT2G30600	AT2G30600 BTB/POZ domain-containing protein	25
AT3G10300	AT3G10300 Calcium-binding EF-hand family protein	25
AT3G19050	AT3G19050 POK2 phragmoplast orienting kinesin 2	25
AT1G47210	AT1G47210 CYCA3;2 cyclin-dependent protein kinase 3;2	24
AT2G44100	AT2G44100 ATGDI1, AT-GDI1, GDI1 guanosine nucleotide diphosphate dissociation inhibitor 1	24
AT3G03780	AT3G03780 ATMS2, MS2 methionine synthase 2	23
AT1G22610	AT1G22610 C2 calcium/lipid-binding plant phosphoribosyltransferase family protein	23
AT1G53885	AT1G53885 collapsed_with_AT1G53903	22
AT5G56610	AT5G56610 Phosphotyrosine protein phosphatases superfamily protein	22
AT2G01210	AT2G01210 Leucine-rich repeat protein kinase family protein	21
AT1G79150	AT1G79150 binding	21
AT1G18420	AT1G18420 Aluminium activated malate transporter family protein	21
AT1G79000	AT1G79000 HAC1 histone acetyltransferase of the CBP family 1	21
AT2G36250	AT2G36250 FTSZ2-1, ATFTSZ2-1 Tubulin/FtsZ family protein	21
AT4G11150	AT4G11150 TUF, emb2448, TUFF, VHA-E1 vacuolar ATP synthase subunit E1	20

## Sheet: Control 1
Mascot scores of anti-GFP immunoprecipitation
		STL1-GFP control 1
prot_acc	prot_desc	protein score
AT1G76010	AT1G76010 Alba DNA/RNA-binding protein	2059
AT2G41770	AT2G41770 Stello 1	2057
AT5G42020	AT5G42020 BIP, BIP2 Heat shock protein 70 (Hsp 70) family protein	2048
AT5G17920	AT5G17920 ATCIMS, ATMETS, ATMS1 Cobalamin-independent synthase family protein	1595
AT5G52470	AT5G52470 FIB1, FBR1, ATFIB1, ATFBR1, SKIP7 fibrillarin 1	1053
AT4G25630	AT4G25630 FIB2, ATFIB2 fibrillarin 2	895
AT1G20220	AT1G20220 Alba DNA/RNA-binding protein	894
AT1G13440	AT1G13440 GAPC-2, GAPC2 glyceraldehyde-3-phosphate dehydrogenase C2	696
AT2G41840	AT2G41840 Ribosomal protein S5 family protein	548
AT1G58380	AT1G58380 XW6 Ribosomal protein S5 family protein	530
AT1G72370	AT1G72370 P40, AP40, RP40, RPSAA 40s ribosomal protein SA	508
AT3G08580	AT3G08580 AAC1 ADP/ATP carrier 1	478
AT1G22780	AT1G22780 collapsed_with_AT1G34030_AT4G09800	439
AT4G39200	AT4G39200 Ribosomal protein S25 family protein	404
AT5G64200	AT5G64200 ATSC35, SC35, At-SC35 ortholog of human splicing factor SC35	400
AT1G07920	AT1G07920 collapsed_with_AT1G07930_AT1G07940_AT5G60390	374
AT3G57150	AT3G57150 NAP57, AtNAP57, CBF5, AtCBF5 homologue of NAP57	358
AT2G21580	AT2G21580 Ribosomal protein S25 family protein	348
AT1G04820	AT1G04820 collapsed_with_AT1G50010	345
AT1G70770	AT1G70770 Protein of unknown function DUF2359, transmembrane	334
AT5G19770	AT5G19770 collapsed_with_AT5G19780	333
AT3G12580	AT3G12580 HSP70, ATHSP70 heat shock protein 70	333
AT2G31610	AT2G31610 Ribosomal protein S3 family protein	297
AT2G36160	AT2G36160 Ribosomal protein S11 family protein	290
AT2G30490	AT2G30490 ATC4H, C4H, CYP73A5, REF3 cinnamate-4-hydroxylase	283
AT1G31290	AT1G31290 AGO3 ARGONAUTE 3	232
AT5G44340	AT5G44340 TUB4 tubulin beta chain 4	194
AT2G01210	AT2G01210 Leucine-rich repeat protein kinase family protein	174
AT1G66280	AT1G66280 BGLU22 Glycosyl hydrolase superfamily protein	172
AT1G20010	AT1G20010 TUB5 tubulin beta-5 chain	161
AT2G16940	AT2G16940 Splicing factor, CC1-like	154
AT3G16460	AT3G16460 Mannose-binding lectin superfamily protein	150
AT3G04230	AT3G04230 Ribosomal protein S5 domain 2-like superfamily protein	137
AT1G07790	AT1G07790 HTB1 Histone superfamily protein	126
AT1G06220	AT1G06220 MEE5 Ribosomal protein S5/Elongation factor G/III/V family protein	121
AT1G18540	AT1G18540 Ribosomal protein L6 family protein	121
AT2G47000	AT2G47000 MDR4, PGP4, ABCB4, ATPGP4 ATP binding cassette subfamily B4	121
AT5G07350	AT5G07350 Tudor1, AtTudor1, TSN1 TUDOR-SN protein 1	116
AT4G21150	AT4G21150 HAP6 ribophorin II (RPN2) family protein	116
AT2G18740	AT2G18740 Small nuclear ribonucleoprotein family protein	115
AT3G03920	AT3G03920 H/ACA ribonucleoprotein complex, subunit Gar1/Naf1 protein	114
AT5G43960	AT5G43960 Nuclear transport factor 2 (NTF2) family protein with RNA binding (RRM-RBD-RNP motifs) domain	113
AT2G18020	AT2G18020 EMB2296 Ribosomal protein L2 family	110
AT5G09810	AT5G09810 ACT7 actin 7	109
AT5G61780	AT5G61780 Tudor2, AtTudor2, TSN2 TUDOR-SN protein 2	109
AT1G54270	AT1G54270 EIF4A-2 eif4a-2	109
AT5G15200	AT5G15200 Ribosomal protein S4	109
AT2G20580	AT2G20580 RPN1A, ATRPN1A 26S proteasome regulatory subunit S2 1A	108
AT1G66270	AT1G66270 BGLU21 Glycosyl hydrolase superfamily protein	96
AT2G01250	AT2G01250 Ribosomal protein L30/L7 family protein	95
AT3G09260	AT3G09260 PYK10, PSR3, BGLU23, LEB Glycosyl hydrolase superfamily protein	94
AT2G40510	AT2G40510 Ribosomal protein S26e family protein	92
AT3G02090	AT3G02090 MPPBETA Insulinase (Peptidase family M16) protein	91
AT4G24330	AT4G24330 Protein of unknown function (DUF1682)	91
AT1G74050	AT1G74050 Ribosomal protein L6 family protein	90
AT1G20960	AT1G20960 emb1507 U5 small nuclear ribonucleoprotein helicase, putative	90
AT3G05590	AT3G05590 RPL18 ribosomal protein L18	90
AT5G19760	AT5G19760 Mitochondrial substrate carrier family protein	89
AT3G04920	AT3G04920 Ribosomal protein S24e family protein	87
AT2G47650	AT2G47650 UXS4 UDP-xylose synthase 4	86
AT5G49880	AT5G49880 mitotic checkpoint family protein	85
AT1G20260	AT1G20260 ATPase, V1 complex, subunit B protein	85
AT1G64740	AT1G64740 TUA1 alpha-1 tubulin	85
AT5G66680	AT5G66680 DGL1 dolichyl-diphosphooligosaccharide-protein glycosyltransferase 48kDa subunit family protein	83
AT2G02930	AT2G02930 ATGSTF3, GST16, GSTF3 glutathione S-transferase F3	83
AT3G07030	AT3G07030 Alba DNA/RNA-binding protein	81
AT3G57010	AT3G57010 Calcium-dependent phosphotriesterase superfamily protein	81
AT2G42520	AT2G42520 P-loop containing nucleoside triphosphate hydrolases superfamily protein	79
AT3G58510	AT3G58510 DEA(D/H)-box RNA helicase family protein	76
AT5G44500	AT5G44500 Small nuclear ribonucleoprotein family protein	76
AT1G29250	AT1G29250 Alba DNA/RNA-binding protein	76
AT3G20370	AT3G20370 TRAF-like family protein	75
AT2G04170	AT2G04170 TRAF-like family protein	74
AT2G15400	AT2G15400 RBP36B, NRPE3B DNA-directed RNA polymerase family protein	73
AT3G25520	AT3G25520 ATL5, PGY3, OLI5, RPL5A ribosomal protein L5	72
AT3G45030	AT3G45030 collapsed_with_AT5G62300	71
AT2G34970	AT2G34970 Trimeric LpxA-like enzyme	71
AT5G08580	AT5G08580 Calcium-binding EF hand family protein	70
AT2G21390	AT2G21390 Coatomer, alpha subunit	69
AT2G18450	AT2G18450 SDH1-2 succinate dehydrogenase 1-2	68
AT3G04840	AT3G04840 Ribosomal protein S3Ae	68
AT2G24180	AT2G24180 CYP71B6 cytochrome p450 71b6	67
AT1G07770	AT1G07770 collapsed_with_AT5G59850	66
AT2G44530	AT2G44530 Phosphoribosyltransferase family protein	66
AT1G04270	AT1G04270 RPS15 cytosolic ribosomal protein S15	64
AT2G42740	AT2G42740 RPL16A ribosomal protein large subunit 16A	60
AT1G20580	AT1G20580 Small nuclear ribonucleoprotein family protein	59
AT4G35630	AT4G35630 PSAT phosphoserine aminotransferase	58
AT5G50850	AT5G50850 MAB1 Transketolase family protein	57
AT1G27090	AT1G27090 glycine-rich protein	56
AT1G71220	AT1G71220 EBS1 UDP-glucose:glycoprotein glucosyltransferases;transferases, transferring hexosyl groups;transferases, transferring glycosyl groups	56
AT1G52360	AT1G52360 Coatomer, beta~ subunit	56
AT2G21160	AT2G21160 Translocon-associated protein (TRAP), alpha subunit	55
AT1G27400	AT1G27400 Ribosomal protein L22p/L17e family protein	54
AT5G14040	AT5G14040 PHT3;1 phosphate transporter 3;1	54
AT2G40010	AT2G40010 Ribosomal protein L10 family protein	54
AT3G48860	AT3G48860 unknown protein; INVOLVED IN: biological_process unknown; LOCATED IN: plasma membrane; EXPRESSED IN: 22 plant structures; EXPRESSED DURING: 13 growth stages; BEST Arabidopsis thaliana protein match is: unknown protein (TAIR:AT5G23700); Ha	54
AT2G17360	AT2G17360 Ribosomal protein S4 (RPS4A) family protein	53
AT3G10090	AT3G10090 collapsed_with_AT5G03850	53
AT2G03510	AT2G03510 SPFH/Band 7/PHB domain-containing membrane-associated protein family	53
AT3G19820	AT3G19820 DWF1, DIM, EVE1, DIM1, CBB1 cell elongation protein / DWARF1 / DIMINUTO (DIM)	52
AT5G60640	AT5G60640 ATPDIL1-4, PDI2, ATPDI2, PDIL1-4 PDI-like 1-4	50
AT2G23170	AT2G23170 GH3 Auxin-responsive GH3 family protein	50
AT2G28760	AT2G28760 UXS6 UDP-XYL synthase 6	50
AT1G43910	AT1G43910 P-loop containing nucleoside triphosphate hydrolases superfamily protein	50
AT3G14990	AT3G14990 Class I glutamine amidotransferase-like superfamily protein	48
AT1G56330	AT1G56330 SAR1, ATSAR1, ATSARA1B, ATSAR1B, SAR1B secretion-associated RAS 1B	47
AT4G27450	AT4G27450 Aluminium induced protein with YGL and LRDR motifs	46
AT5G65020	AT5G65020 ANNAT2 annexin 2	45
AT4G26910	AT4G26910 Dihydrolipoamide succinyltransferase	44
AT1G15250	AT1G15250 Zinc-binding ribosomal protein family protein	43
AT2G44120	AT2G44120 Ribosomal protein L30/L7 family protein	43
AT2G41475	AT2G41475 Embryo-specific protein 3, (ATS3)	41
AT1G48830	AT1G48830 Ribosomal protein S7e family protein	41
AT3G49010	AT3G49010 ATBBC1, BBC1, RSU2 breast basic conserved 1	40
AT1G49780	AT1G49780 PUB26 plant U-box 26	39
AT1G80070	AT1G80070 SUS2, EMB33, EMB177, EMB14 Pre-mRNA-processing-splicing factor	39
AT2G04390	AT2G04390 Ribosomal S17 family protein	38
AT4G27270	AT4G27270 Quinone reductase family protein	37
AT1G56110	AT1G56110 NOP56 homolog of nucleolar protein NOP56	36
AT1G33120	AT1G33120 collapsed_with_AT1G33140	35
AT5G36970	AT5G36970 NHL25 NDR1/HIN1-like 25	35
AT1G55040	AT1G55040 zinc finger (Ran-binding) family protein	34
AT1G10630	AT1G10630 ATARFA1F, ARFA1F ADP-ribosylation factor A1F	34
AT1G76400	AT1G76400 Ribophorin I	33
AT3G61080	AT3G61080 Protein kinase superfamily protein	33
AT4G03090	AT4G03090 sequence-specific DNA binding;sequence-specific DNA binding transcription factors	33
AT5G57020	AT5G57020 NMT1, ATNMT1 myristoyl-CoA:protein N-myristoyltransferase	33
AT4G24190	AT4G24190 SHD, HSP90, AtHsp90, AtHsp90-7 Chaperone protein htpG family protein	32
AT3G50670	AT3G50670 U1-70K, U1SNRNP U1 small nuclear ribonucleoprotein-70K	32
AT3G51050	AT3G51050 FG-GAP repeat-containing protein	32
AT5G22330	AT5G22330 ATTIP49A, RIN1 P-loop containing nucleoside triphosphate hydrolases superfamily protein	30
AT1G67560	AT1G67560 LOX6 PLAT/LH2 domain-containing lipoxygenase family protein	30
AT3G44330	AT3G44330 INVOLVED IN: protein processing; LOCATED IN: mitochondrion, endoplasmic reticulum, plasma membrane, vacuole; EXPRESSED IN: 25 plant structures; EXPRESSED DURING: 13 growth stages; CONTAINS InterPro DOMAIN/s: Nicalin (InterPro:IPR016574),	30
AT1G77120	AT1G77120 ADH1, ADH, ATADH, ATADH1 alcohol dehydrogenase 1	29
AT1G16610	AT1G16610 SR45 arginine/serine-rich 45	29
AT1G54000	AT1G54000 GDSL-like Lipase/Acylhydrolase superfamily protein	29
AT3G49910	AT3G49910 Translation protein SH3-like family protein	28
AT1G09630	AT1G09630 ATRAB11C, ATRABA2A, ATRAB-A2A, RAB-A2A, RAB11c RAB GTPase 11C	27
AT1G23860	AT1G23860 SRZ-21, SRZ21, RSZP21, RSZ21, At-RSZ21 RS-containing zinc finger protein 21	27
AT4G28600	AT4G28600 NPGR2 no pollen germination related 2	27
AT2G37190	AT2G37190 Ribosomal protein L11 family protein	26
AT1G10580	AT1G10580 Transducin/WD40 repeat-like superfamily protein	26
AT1G35220	AT1G35220 unknown protein	26
AT1G07660	AT1G07660 collapsed_with_AT1G07820_AT2G28740_AT3G45930_AT3G53730_AT3G46320_AT5G59690_AT5G59970	25
AT1G55850	AT1G55850 ATCSLE1, CSLE1 cellulose synthase like E1	25
AT5G02310	AT5G02310 PRT6 proteolysis 6	25
AT3G16000	AT3G16000 MFP1 MAR binding filament-like protein 1	25
AT2G25660	AT2G25660 emb2410 embryo defective 2410	25
AT5G62050	AT5G62050 OXA1, ATOXA1, OXA1AT homolog of yeast oxidase assembly 1 (OXA1)	24
AT2G33150	AT2G33150 PKT3, PED1, KAT2 peroxisomal 3-ketoacyl-CoA thiolase 3	24
AT3G09680	AT3G09680 Ribosomal protein S12/S23 family protein	23
AT2G36460	AT2G36460 Aldolase superfamily protein	23
AT2G40815	AT2G40815 Calcium-dependent lipid-binding (CaLB domain) family protein	23
AT1G76930	AT1G76930 ATEXT4, ORG5, ATEXT1, EXT1, EXT4 extensin 4	22
AT5G16020	AT5G16020 GEX3 gamete-expressed 3	22
AT2G24395	AT2G24395 chaperone protein dnaJ-related	22
AT1G15690	AT1G15690 AVP1, ATAVP3, AVP-3, AtVHP1;1 Inorganic H pyrophosphatase family protein	21
AT1G14320	AT1G14320 SAC52, RPL10, RPL10A Ribosomal protein L16p/L10e family protein	21
AT5G05470	AT5G05470 EIF2 ALPHA, ATEIF2-A2, EIF2-A2 eukaryotic translation initiation factor 2 alpha subunit	21
AT1G71880	AT1G71880 SUC1, ATSUC1 sucrose-proton symporter 1	20

## Sheet: Control 2
Mascot scores of anti-GFP immunoprecipitation
		STL1-GFP control 2
prot_acc	prot_desc	protein score
AT2G41770	AT2G41770 Stello 1	2282
AT3G57420	AT3G57420 Stello 2	610
AT5G17920	AT5G17920 ATCIMS, ATMETS, ATMS1 Cobalamin-independent synthase family protein	199
AT3G08580	AT3G08580 AAC1 ADP/ATP carrier 1	150
AT1G13440	AT1G13440 GAPC-2, GAPC2 glyceraldehyde-3-phosphate dehydrogenase C2	89
AT5G66760	AT5G66760 SDH1-1 succinate dehydrogenase 1-1	88
AT5G28540	AT5G28540 BIP1 heat shock protein 70 (Hsp 70) family protein	81
AT3G20250	AT3G20250 APUM5, PUM5 pumilio 5	68
AT1G72370	AT1G72370 P40, AP40, RP40, RPSAA 40s ribosomal protein SA	68
AT3G02090	AT3G02090 MPPBETA Insulinase (Peptidase family M16) protein	59
AT2G18020	AT2G18020 EMB2296 Ribosomal protein L2 family	56
AT1G77120	AT1G77120 ADH1, ADH, ATADH, ATADH1 alcohol dehydrogenase 1	51
AT2G01470	AT2G01470 STL2P, ATSEC12 SEC12P-like 2 protein	51
AT1G65070	AT1G65070 DNA mismatch repair protein MutS, type 2	49
AT2G37190	AT2G37190 Ribosomal protein L11 family protein	48
AT1G49780	AT1G49780 PUB26 plant U-box 26	47
AT5G07350	AT5G07350 Tudor1, AtTudor1, TSN1 TUDOR-SN protein 1	46
AT1G07920	AT1G07920 collapsed_with_AT1G07930_AT1G07940_AT5G60390	45
AT5G67500	AT5G67500 VDAC2 voltage dependent anion channel 2	42
AT5G66470	AT5G66470 RNA binding;GTP binding	41
AT1G51980	AT1G51980 Insulinase (Peptidase family M16) protein	40
AT4G19440	AT4G19440 Tetratricopeptide repeat (TPR)-like superfamily protein	39
AT2G01210	AT2G01210 Leucine-rich repeat protein kinase family protein	39
AT2G07698	AT2G07698 ATPase, F1 complex, alpha subunit protein	38
AT2G30490	AT2G30490 ATC4H, C4H, CYP73A5, REF3 cinnamate-4-hydroxylase	36
AT5G13430	AT5G13430 Ubiquinol-cytochrome C reductase iron-sulfur subunit	35
AT2G33510	AT2G33510 unknown protein	35
AT1G78900	AT1G78900 VHA-A vacuolar ATP synthase subunit A	32
AT3G45030	AT3G45030 collapsed_with_AT5G62300	30
AT2G05710	AT2G05710 ACO3 aconitase 3	29
AT1G16300	AT1G16300 GAPCP-2 glyceraldehyde-3-phosphate dehydrogenase of plastid 2	29
AT3G10010	AT3G10010 DML2 demeter-like 2	29
AT4G11150	AT4G11150 TUF, emb2448, TUFF, VHA-E1 vacuolar ATP synthase subunit E1	27
AT5G08670	AT5G08670 ATP synthase alpha/beta family protein	27
AT1G07790	AT1G07790 HTB1 Histone superfamily protein	26
AT5G62050	AT5G62050 OXA1, ATOXA1, OXA1AT homolog of yeast oxidase assembly 1 (OXA1)	26
AT2G30600	AT2G30600 BTB/POZ domain-containing protein	25
AT4G24190	AT4G24190 SHD, HSP90, AtHsp90, AtHsp90-7 Chaperone protein htpG family protein	25
AT4G28710	AT4G28710 XIH, ATXIH Myosin family protein with Dil domain	25
AT2G47750	AT2G47750 GH3 putative indole-3-acetic acid-amido synthetase GH3	25
AT1G21200	AT1G21200 sequence-specific DNA binding transcription factors	24
AT4G05470	AT4G05470 RNI-like superfamily protein	24
AT3G54850	AT3G54850 ATPUB14, PUB14 plant U-box 14	23
AT2G47620	AT2G47620 ATSWI3A, CHB1, SWI3A SWITCH/sucrose nonfermenting 3A	23
AT5G16020	AT5G16020 GEX3 gamete-expressed 3	22
AT1G09200	AT1G09200 collapsed_with_AT3G27360_AT5G10390_AT5G10400_AT5G65360	21
AT1G79150	AT1G79150 binding	21
AT1G49240	AT1G49240 ACT8 actin 8	21
AT5G02940	AT5G02940 Protein of unknown function (DUF1012)	20
AT5G27510	AT5G27510 Protein kinase superfamily protein	20

## Sheet: Control 3
Supplementary Table S1. Mascot scores of anti-GFP immunoprecipitation
		STL1-GFP control 3
prot_acc	prot_desc	protein score
AT2G41770	AT2G41770 Stello 1	1707
AT3G57420	AT3G57420 Stello 2	454
AT3G08580	AT3G08580 AAC1 ADP/ATP carrier 1	117
AT5G28540	AT5G28540 BIP1 heat shock protein 70 (Hsp 70) family protein	77
AT3G20250	AT3G20250 APUM5, PUM5 pumilio 5	65
AT1G13440	AT1G13440 GAPC-2, GAPC2 glyceraldehyde-3-phosphate dehydrogenase C2	51
AT2G07698	AT2G07698 ATPase, F1 complex, alpha subunit protein	46
AT1G49780	AT1G49780 PUB26 plant U-box 26	44
AT5G66470	AT5G66470 RNA binding;GTP binding	42
AT4G19440	AT4G19440 Tetratricopeptide repeat (TPR)-like superfamily protein	39
AT5G27720	AT5G27720 emb1644 Small nuclear ribonucleoprotein family protein	39
AT2G01210	AT2G01210 Leucine-rich repeat protein kinase family protein	38
AT1G07920	AT1G07920 collapsed_with_AT1G07930_AT1G07940_AT5G60390	36
AT3G02090	AT3G02090 MPPBETA Insulinase (Peptidase family M16) protein	33
AT3G27870	AT3G27870 ATPase E1-E2 type family protein / haloacid dehalogenase-like hydrolase family protein	32
AT3G45030	AT3G45030 collapsed_with_AT5G62300	31
AT2G18020	AT2G18020 EMB2296 Ribosomal protein L2 family	30
AT5G67500	AT5G67500 VDAC2 voltage dependent anion channel 2	28
AT5G50850	AT5G50850 MAB1 Transketolase family protein	27
AT2G41475	AT2G41475 Embryo-specific protein 3, (ATS3)	25
AT5G04200	AT5G04200 AtMC9, MC9 metacaspase 9	25
AT1G72370	AT1G72370 P40, AP40, RP40, RPSAA 40s ribosomal protein SA	24
AT1G22200	AT1G22200 Endoplasmic reticulum vesicle transporter protein	23
AT2G39460	AT2G39460 ATRPL23A, RPL23A, RPL23AA ribosomal protein L23AA	22
AT2G18450	AT2G18450 SDH1-2 succinate dehydrogenase 1-2	22
AT3G03780	AT3G03780 ATMS2, MS2 methionine synthase 2	22
AT5G02940	AT5G02940 Protein of unknown function (DUF1012)	22
AT2G36160	AT2G36160 Ribosomal protein S11 family protein	21
AT1G19140	AT1G19140	21
AT5G36970	AT5G36970 NHL25 NDR1/HIN1-like 25	20
