# Supplementary material for: β-1,4-Xylan backbone synthesis in higher plants: How complex can it be?
Source: Front Plant Sci. 2023 Jan 11;13:1076298. doi: 10.3389/fpls.2022.1076298 (PMC9874913; doi:10.3389/fpls.2022.1076298)
Supplement: Supplementary file 8 [file Table_2.xlsx]

## Sheet: Sheet1
Supplementary Table S2. List of unique peptide hits identified in 3 biological replicates of anti-GFP immunoprecipitation of IRX14-GFP and STL1-GFP (control)
Sample	Sample name and date	prot_hit_num	Protein hit accession number	Protein description	Protein score	prot_mass	prot_matches	prot_matches_sig	prot_sequences	prot_sequences_sig	Protein coverage (%)	pep_query	pep_rank	pep_isbold	Unique peptide sequence	pep_exp_mz	pep_exp_mr	pep_exp_z	pep_calc_mr	pep_delta	pep_miss	Peptide score	pep_expect	pep_res_before	Peptide sequence	pep_res_after	pep_var_mod	pep_var_mod_pos	pep_scan_title
IRX14GFP rep1	GFPtrap_IRX14GFP_Callus_270914_rep1	7	AT4G36890	IRX14	1248	59347	47	45	12	11	30.9	2412	1	1	1	524.729	1047.44	2	1047.44	-0.0002	0	34.4	0.00084	R	MPNTWEDR	S			File11924 Spectrum7944 scans: 6268
IRX14GFP rep1	GFPtrap_IRX14GFP_Callus_270914_rep1	7	AT4G36890	IRX14	1248	59347	47	45	12	11	30.9	2413	1	1	1	524.73	1047.44	2	1047.44	0.0002	0	38.15	0.00032	R	MPNTWEDR	S			File11924 Spectrum8187 scans: 6527
IRX14GFP rep1	GFPtrap_IRX14GFP_Callus_270914_rep1	7	AT4G36890	IRX14	1248	59347	47	45	12	11	30.9	4001	1	1	1	625.352	1248.69	2	1248.69	-0.0012	0	43.96	0.00031	K	MVIAVTPTYVR	T			File11924 Spectrum12167 scans: 8684
IRX14GFP rep1	GFPtrap_IRX14GFP_Callus_270914_rep1	7	AT4G36890	IRX14	1248	59347	47	45	12	11	30.9	4002	1	1	1	625.352	1248.69	2	1248.69	-0.001	0	43.78	0.00033	K	MVIAVTPTYVR	T			File11924 Spectrum13648 scans: 9206
IRX14GFP rep1	GFPtrap_IRX14GFP_Callus_270914_rep1	7	AT4G36890	IRX14	1248	59347	47	45	12	11	30.9	4003	1	1	1	625.352	1248.69	2	1248.69	-0.0007	0	68.72	1e-06	K	MVIAVTPTYVR	T			File11924 Spectrum12037 scans: 8547
IRX14GFP rep1	GFPtrap_IRX14GFP_Callus_270914_rep1	7	AT4G36890	IRX14	1248	59347	47	45	12	11	30.9	4004	1	1	1	625.352	1248.69	2	1248.69	-0.0004	0	55.99	2e-05	K	MVIAVTPTYVR	T			File11924 Spectrum13540 scans: 9081
IRX14GFP rep1	GFPtrap_IRX14GFP_Callus_270914_rep1	7	AT4G36890	IRX14	1248	59347	47	45	12	11	30.9	4005	1	1	1	625.352	1248.69	2	1248.69	-0.0004	0	51.95	5e-05	K	MVIAVTPTYVR	T			File11924 Spectrum12411 scans: 8948
IRX14GFP rep1	GFPtrap_IRX14GFP_Callus_270914_rep1	7	AT4G36890	IRX14	1248	59347	47	45	12	11	30.9	4006	1	1	1	625.352	1248.69	2	1248.69	0	0	42.5	0.00044	K	MVIAVTPTYVR	T			File11924 Spectrum13924 scans: 9503
IRX14GFP rep1	GFPtrap_IRX14GFP_Callus_270914_rep1	7	AT4G36890	IRX14	1248	59347	47	45	12	11	30.9	4007	1	1	1	625.352	1248.69	2	1248.69	0	0	43.86	0.00032	K	MVIAVTPTYVR	T			File11924 Spectrum12284 scans: 8813
IRX14GFP rep1	GFPtrap_IRX14GFP_Callus_270914_rep1	7	AT4G36890	IRX14	1248	59347	47	45	12	11	30.9	4008	1	1	1	625.353	1248.69	2	1248.69	0.0011	0	43.27	0.00037	K	MVIAVTPTYVR	T			File11924 Spectrum13781 scans: 9348
IRX14GFP rep1	GFPtrap_IRX14GFP_Callus_270914_rep1	7	AT4G36890	IRX14	1248	59347	47	45	12	11	30.9	4136	1	1	1	633.349	1264.68	2	1264.68	-0.0024	0	38.38	0.0012	K	MVIAVTPTYVR	T	Oxidation (M)	0.10000000000.0	File11924 Spectrum11871 scans: 8370
IRX14GFP rep1	GFPtrap_IRX14GFP_Callus_270914_rep1	7	AT4G36890	IRX14	1248	59347	47	45	12	11	30.9	4137	1	1	1	633.35	1264.68	2	1264.68	-0.0005	0	29.22	0.011	K	MVIAVTPTYVR	T	Oxidation (M)	0.10000000000.0	File11924 Spectrum12006 scans: 8512
IRX14GFP rep1	GFPtrap_IRX14GFP_Callus_270914_rep1	7	AT4G36890	IRX14	1248	59347	47	45	12	11	30.9	4138	1	1	1	633.35	1264.68	2	1264.68	-0.0003	0	28.02	0.014	K	MVIAVTPTYVR	T	Oxidation (M)	0.10000000000.0	File11924 Spectrum11744 scans: 8236
IRX14GFP rep1	GFPtrap_IRX14GFP_Callus_270914_rep1	7	AT4G36890	IRX14	1248	59347	47	45	12	11	30.9	4139	1	1	1	633.35	1264.68	2	1264.68	-0.0003	0	34.67	0.003	K	MVIAVTPTYVR	T	Oxidation (M)	0.10000000000.0	File11924 Spectrum10276 scans: 7742
IRX14GFP rep1	GFPtrap_IRX14GFP_Callus_270914_rep1	7	AT4G36890	IRX14	1248	59347	47	45	12	11	30.9	4140	1	1	1	633.35	1264.68	2	1264.68	0	0	35.9	0.0023	K	MVIAVTPTYVR	T	Oxidation (M)	0.10000000000.0	File11924 Spectrum11545 scans: 8023
IRX14GFP rep1	GFPtrap_IRX14GFP_Callus_270914_rep1	7	AT4G36890	IRX14	1248	59347	47	45	12	11	30.9	4141	1	1	1	633.35	1264.69	2	1264.68	0.0002	0	39.5	0.001	K	MVIAVTPTYVR	T	Oxidation (M)	0.10000000000.0	File11924 Spectrum10414 scans: 7888
IRX14GFP rep1	GFPtrap_IRX14GFP_Callus_270914_rep1	7	AT4G36890	IRX14	1248	59347	47	45	12	11	30.9	4471	1	1	1	654.338	1306.66	2	1306.67	-0.0045	0	61.6	9.5e-06	K	LEWSGFVLNSR	L			File11924 Spectrum16058 scans: 10740
IRX14GFP rep1	GFPtrap_IRX14GFP_Callus_270914_rep1	7	AT4G36890	IRX14	1248	59347	47	45	12	11	30.9	4472	1	1	1	654.339	1306.66	2	1306.67	-0.0034	0	23.64	0.059	K	LEWSGFVLNSR	L			File11924 Spectrum16281 scans: 11003
IRX14GFP rep1	GFPtrap_IRX14GFP_Callus_270914_rep1	7	AT4G36890	IRX14	1248	59347	47	45	12	11	30.9	4473	1	1	1	654.339	1306.66	2	1306.67	-0.0031	0	61.76	9.8e-06	K	LEWSGFVLNSR	L			File11924 Spectrum16175 scans: 10873
IRX14GFP rep1	GFPtrap_IRX14GFP_Callus_270914_rep1	7	AT4G36890	IRX14	1248	59347	47	45	12	11	30.9	4474	1	1	1	654.339	1306.66	2	1306.67	-0.0027	0	43.36	0.00068	K	LEWSGFVLNSR	L			File11924 Spectrum15945 scans: 10612
IRX14GFP rep1	GFPtrap_IRX14GFP_Callus_270914_rep1	7	AT4G36890	IRX14	1248	59347	47	45	12	11	30.9	5280	1	1	1	702.816	1403.62	2	1403.62	-0.0004	0	27.96	0.0038	K	DPSMVEPLGSCGR	Q			File11924 Spectrum11598 scans: 8079
IRX14GFP rep1	GFPtrap_IRX14GFP_Callus_270914_rep1	7	AT4G36890	IRX14	1248	59347	47	45	12	11	30.9	5281	1	1	1	702.816	1403.62	2	1403.62	-0.0003	0	62.68	1.3e-06	K	DPSMVEPLGSCGR	Q			File11924 Spectrum11474 scans: 7948
IRX14GFP rep1	GFPtrap_IRX14GFP_Callus_270914_rep1	7	AT4G36890	IRX14	1248	59347	47	45	12	11	30.9	5361	1	1	1	710.813	1419.61	2	1419.61	-0.0006	0	27.25	0.0052	K	DPSMVEPLGSCGR	Q	Oxidation (M)	0.0001000000000.0	File11924 Spectrum9458 scans: 6857
IRX14GFP rep1	GFPtrap_IRX14GFP_Callus_270914_rep1	7	AT4G36890	IRX14	1248	59347	47	45	12	11	30.9	5677	1	1	1	730.87	1459.73	2	1459.73	-0.0093	0	25.5	0.031	R	TPWPDVPPEPPTK	K			File11924 Spectrum13513 scans: 9052
IRX14GFP rep1	GFPtrap_IRX14GFP_Callus_270914_rep1	7	AT4G36890	IRX14	1248	59347	47	45	12	11	30.9	5678	1	1	1	730.874	1459.73	2	1459.73	-0.0016	0	46.01	0.0003	R	TPWPDVPPEPPTK	K			File11924 Spectrum12127 scans: 8642
IRX14GFP rep1	GFPtrap_IRX14GFP_Callus_270914_rep1	7	AT4G36890	IRX14	1248	59347	47	45	12	11	30.9	5679	1	1	1	730.875	1459.73	2	1459.73	-0.0004	0	53.72	4.9e-05	R	TPWPDVPPEPPTK	K			File11924 Spectrum12251 scans: 8776
IRX14GFP rep1	GFPtrap_IRX14GFP_Callus_270914_rep1	7	AT4G36890	IRX14	1248	59347	47	45	12	11	30.9	5680	1	1	1	730.875	1459.73	2	1459.73	-0.0003	0	54	4.6e-05	R	TPWPDVPPEPPTK	K			File11924 Spectrum11996 scans: 8502
IRX14GFP rep1	GFPtrap_IRX14GFP_Callus_270914_rep1	7	AT4G36890	IRX14	1248	59347	47	45	12	11	30.9	5681	1	1	1	730.875	1459.74	2	1459.73	0.0003	0	30.84	0.01	R	TPWPDVPPEPPTK	K			File11924 Spectrum12381 scans: 8916
IRX14GFP rep1	GFPtrap_IRX14GFP_Callus_270914_rep1	7	AT4G36890	IRX14	1248	59347	47	45	12	11	30.9	6755	1	1	1	794.932	1587.85	2	1587.85	-0.0011	0	90.63	1e-08	K	SAVYIDDVAAVLPQK	L			File11924 Spectrum15661 scans: 10280
IRX14GFP rep1	GFPtrap_IRX14GFP_Callus_270914_rep1	7	AT4G36890	IRX14	1248	59347	47	45	12	11	30.9	6756	1	1	1	794.932	1587.85	2	1587.85	-0.0009	0	90.12	1.2e-08	K	SAVYIDDVAAVLPQK	L			File11924 Spectrum15538 scans: 10148
IRX14GFP rep1	GFPtrap_IRX14GFP_Callus_270914_rep1	7	AT4G36890	IRX14	1248	59347	47	45	12	11	30.9	6757	1	1	1	530.291	1587.85	3	1587.85	-0.0007	0	40.16	0.0011	K	SAVYIDDVAAVLPQK	L			File11924 Spectrum14445 scans: 10089
IRX14GFP rep1	GFPtrap_IRX14GFP_Callus_270914_rep1	7	AT4G36890	IRX14	1248	59347	47	45	12	11	30.9	6758	1	1	1	794.933	1587.85	2	1587.85	0.0005	0	90.23	1.1e-08	K	SAVYIDDVAAVLPQK	L			File11924 Spectrum14382 scans: 10019
IRX14GFP rep1	GFPtrap_IRX14GFP_Callus_270914_rep1	7	AT4G36890	IRX14	1248	59347	47	45	12	11	30.9	6759	1	1	1	794.933	1587.85	2	1587.85	0.0017	0	77.19	2.2e-07	K	SAVYIDDVAAVLPQK	L			File11924 Spectrum14263 scans: 9890
IRX14GFP rep1	GFPtrap_IRX14GFP_Callus_270914_rep1	7	AT4G36890	IRX14	1248	59347	47	45	12	11	30.9	6760	1	1	1	794.934	1587.85	2	1587.85	0.003	0	64.02	4.7e-06	K	SAVYIDDVAAVLPQK	L			File11924 Spectrum15776 scans: 10413
IRX14GFP rep1	GFPtrap_IRX14GFP_Callus_270914_rep1	7	AT4G36890	IRX14	1248	59347	47	45	12	11	30.9	6761	1	1	1	530.293	1587.86	3	1587.85	0.007	0	41.07	0.00082	K	SAVYIDDVAAVLPQK	L			File11924 Spectrum15607 scans: 10222
IRX14GFP rep1	GFPtrap_IRX14GFP_Callus_270914_rep1	7	AT4G36890	IRX14	1248	59347	47	45	12	11	30.9	7804	1	1	1	863.463	1724.91	2	1724.91	-0.0024	0	83.6	4.4e-08	K	DQMPLSQGNTVVVIPK	Q			File11924 Spectrum13902 scans: 9479
IRX14GFP rep1	GFPtrap_IRX14GFP_Callus_270914_rep1	7	AT4G36890	IRX14	1248	59347	47	45	12	11	30.9	7805	1	1	1	863.463	1724.91	2	1724.91	-0.0021	0	35.54	0.0029	K	DQMPLSQGNTVVVIPK	Q			File11924 Spectrum14019 scans: 9610
IRX14GFP rep1	GFPtrap_IRX14GFP_Callus_270914_rep1	7	AT4G36890	IRX14	1248	59347	47	45	12	11	30.9	7807	1	1	1	863.465	1724.91	2	1724.91	0.0018	0	29.5	0.011	K	DQMPLSQGNTVVVIPK	Q			File11924 Spectrum13780 scans: 9347
IRX14GFP rep1	GFPtrap_IRX14GFP_Callus_270914_rep1	7	AT4G36890	IRX14	1248	59347	47	45	12	11	30.9	7913	1	1	1	871.46	1740.91	2	1740.91	-0.0022	0	31.23	0.007	K	DQMPLSQGNTVVVIPK	Q	Oxidation (M)	0.0010000000000000.0	File11924 Spectrum12101 scans: 8614
IRX14GFP rep1	GFPtrap_IRX14GFP_Callus_270914_rep1	7	AT4G36890	IRX14	1248	59347	47	45	12	11	30.9	7914	1	1	1	871.461	1740.91	2	1740.91	-0.0008	0	62.54	5.2e-06	K	DQMPLSQGNTVVVIPK	Q	Oxidation (M)	0.0010000000000000.0	File11924 Spectrum12226 scans: 8748
IRX14GFP rep1	GFPtrap_IRX14GFP_Callus_270914_rep1	7	AT4G36890	IRX14	1248	59347	47	45	12	11	30.9	8119	1	1	1	590.972	1769.9	3	1769.9	-0.0032	0	21.57	0.071	R	LLWEEAENKPEWVK	D			File11924 Spectrum12131 scans: 8646
IRX14GFP rep1	GFPtrap_IRX14GFP_Callus_270914_rep1	7	AT4G36890	IRX14	1248	59347	47	45	12	11	30.9	9109	1	1	1	496.282	1981.1	4	1981.1	-0.0049	2	30.3	0.0045	K	KKDQMPLSQGNTVVVIPK	Q			File11924 Spectrum14316 scans: 9946
IRX14GFP rep1	GFPtrap_IRX14GFP_Callus_270914_rep1	7	AT4G36890	IRX14	1248	59347	47	45	12	11	30.9	9110	1	1	1	496.284	1981.11	4	1981.1	0.0029	2	28.8	0.0055	K	KKDQMPLSQGNTVVVIPK	Q			File11924 Spectrum14188 scans: 9808
IRX14GFP rep1	GFPtrap_IRX14GFP_Callus_270914_rep1	7	AT4G36890	IRX14	1248	59347	47	45	12	11	30.9	9237	1	1	1	505.995	2019.95	4	2019.95	0.0005	0	34.11	0.0032	K	HEPRPTDTTTQVYSSSSK	H			File11924 Spectrum4387 scans: 4560
IRX14GFP rep1	GFPtrap_IRX14GFP_Callus_270914_rep1	7	AT4G36890	IRX14	1248	59347	47	45	12	11	30.9	10277	1	1	1	789.097	2364.27	3	2364.27	-0.004	1	34.2	0.0021	R	ADSKFPPGWIIDPPLEITVAAK	R			File11924 Spectrum17849 scans: 11584
IRX14GFP rep1	GFPtrap_IRX14GFP_Callus_270914_rep1	7	AT4G36890	IRX14	1248	59347	47	45	12	11	30.9	10279	1	1	1	789.098	2364.27	3	2364.27	-0.0009	1	38.31	0.00086	R	ADSKFPPGWIIDPPLEITVAAK	R			File11924 Spectrum17735 scans: 11452
IRX14GFP rep1	GFPtrap_IRX14GFP_Callus_270914_rep1	7	AT4G36890	IRX14	1248	59347	47	45	12	11	30.9	11342	1	1	1	950.73	3798.89	4	3798.9	-0.0096	1	21.46	0.053	R	LLWEEAENKPEWVKDFGSLNENEGVESPLSLLK	D			File11924 Spectrum17763 scans: 11485
IRX14GFP rep1	GFPtrap_IRX14GFP_Callus_270914_rep1	29	AT5G61840	IRX10L	363	47677	16	16	5	5	12.3	1270	1	1	1	455.296	908.577	2	908.581	-0.0035	0	29.33	0.0012	R	GILPLLQR	A			File11924 Spectrum15669 scans: 10291
IRX14GFP rep1	GFPtrap_IRX14GFP_Callus_270914_rep1	29	AT5G61840	IRX10L	363	47677	16	16	5	5	12.3	1271	1	1	1	455.297	908.58	2	908.581	-0.0009	0	29.55	0.0011	R	GILPLLQR	A			File11924 Spectrum15777 scans: 10414
IRX14GFP rep1	GFPtrap_IRX14GFP_Callus_270914_rep1	29	AT5G61840	IRX10L	363	47677	16	16	5	5	12.3	1272	1	1	1	455.297	908.58	2	908.581	-0.0007	0	27.01	0.002	R	GILPLLQR	A			File11924 Spectrum15558 scans: 10169
IRX14GFP rep1	GFPtrap_IRX14GFP_Callus_270914_rep1	29	AT5G61840	IRX10L	363	47677	16	16	5	5	12.3	1334	1	1	1	459.773	917.532	2	917.533	-0.0011	0	40.63	0.00083	R	FLLSSPVR	T			File11924 Spectrum12157 scans: 8673
IRX14GFP rep1	GFPtrap_IRX14GFP_Callus_270914_rep1	29	AT5G61840	IRX10L	363	47677	16	16	5	5	12.3	1335	1	1	1	459.774	917.533	2	917.533	-0.0007	0	35.59	0.0027	R	FLLSSPVR	T			File11924 Spectrum11770 scans: 8263
IRX14GFP rep1	GFPtrap_IRX14GFP_Callus_270914_rep1	29	AT5G61840	IRX10L	363	47677	16	16	5	5	12.3	1337	1	1	1	459.774	917.534	2	917.533	0.0005	0	43.29	0.00045	R	FLLSSPVR	T			File11924 Spectrum11905 scans: 8406
IRX14GFP rep1	GFPtrap_IRX14GFP_Callus_270914_rep1	29	AT5G61840	IRX10L	363	47677	16	16	5	5	12.3	2697	1	1	1	541.302	1080.59	2	1080.59	0.0028	0	31.82	0.0047	K	VFVYELPSK	Y			File11924 Spectrum12233 scans: 8755
IRX14GFP rep1	GFPtrap_IRX14GFP_Callus_270914_rep1	29	AT5G61840	IRX10L	363	47677	16	16	5	5	12.3	2698	1	1	1	541.302	1080.59	2	1080.59	0.0037	0	31.7	0.0047	K	VFVYELPSK	Y			File11924 Spectrum12099 scans: 8612
IRX14GFP rep1	GFPtrap_IRX14GFP_Callus_270914_rep1	29	AT5G61840	IRX10L	363	47677	16	16	5	5	12.3	3012	1	1	1	560.807	1119.6	2	1119.6	-0.0035	0	47.41	0.00027	R	ATLVQTFGQR	N			File11924 Spectrum10399 scans: 7872
IRX14GFP rep1	GFPtrap_IRX14GFP_Callus_270914_rep1	29	AT5G61840	IRX10L	363	47677	16	16	5	5	12.3	3013	1	1	1	560.808	1119.6	2	1119.6	-0.0016	0	51.69	9.7e-05	R	ATLVQTFGQR	N			File11924 Spectrum10263 scans: 7727
IRX14GFP rep1	GFPtrap_IRX14GFP_Callus_270914_rep1	29	AT5G61840	IRX10L	363	47677	16	16	5	5	12.3	3014	1	1	1	560.808	1119.6	2	1119.6	-0.0015	0	41.91	0.00092	R	ATLVQTFGQR	N			File11924 Spectrum10115 scans: 7571
IRX14GFP rep1	GFPtrap_IRX14GFP_Callus_270914_rep1	29	AT5G61840	IRX10L	363	47677	16	16	5	5	12.3	3015	1	1	1	560.809	1119.6	2	1119.6	-0.0007	0	25.86	0.038	R	ATLVQTFGQR	N			File11924 Spectrum11657 scans: 8144
IRX14GFP rep1	GFPtrap_IRX14GFP_Callus_270914_rep1	29	AT5G61840	IRX10L	363	47677	16	16	5	5	12.3	3016	1	1	1	560.809	1119.6	2	1119.6	-0.0001	0	35.53	0.0038	R	ATLVQTFGQR	N			File11924 Spectrum11532 scans: 8009
IRX14GFP rep1	GFPtrap_IRX14GFP_Callus_270914_rep1	29	AT5G61840	IRX10L	363	47677	16	16	5	5	12.3	6735	1	1	1	793.885	1585.76	2	1585.76	-0.003	0	29.82	0.0099	R	ISGSAGDVLEDDPVGR	L			File11924 Spectrum11773 scans: 8266
IRX14GFP rep1	GFPtrap_IRX14GFP_Callus_270914_rep1	29	AT5G61840	IRX10L	363	47677	16	16	5	5	12.3	6736	1	1	1	793.885	1585.76	2	1585.76	-0.0022	0	80.02	9.5e-08	R	ISGSAGDVLEDDPVGR	L			File11924 Spectrum11512 scans: 7988
IRX14GFP rep1	GFPtrap_IRX14GFP_Callus_270914_rep1	29	AT5G61840	IRX10L	363	47677	16	16	5	5	12.3	6737	1	1	1	793.889	1585.76	2	1585.76	0.0044	0	77.22	1.9e-07	R	ISGSAGDVLEDDPVGR	L			File11924 Spectrum11643 scans: 8128
IRX14GFP rep1	GFPtrap_IRX14GFP_Callus_270914_rep1	44	AT1G27600	IRX9L	263	45329	14	14	6	6	12.7	1346	1	1	1	460.727	919.439	2	919.44	-0.0006	0	31.71	0.006	K	QPYVEER	L			File11924 Spectrum5483 scans: 4641
IRX14GFP rep1	GFPtrap_IRX14GFP_Callus_270914_rep1	44	AT1G27600	IRX9L	263	45329	14	14	6	6	12.7	1347	1	1	1	460.727	919.44	2	919.44	-0.0001	0	33.39	0.0041	K	QPYVEER	L			File11924 Spectrum5596 scans: 4777
IRX14GFP rep1	GFPtrap_IRX14GFP_Callus_270914_rep1	44	AT1G27600	IRX9L	263	45329	14	14	6	6	12.7	1404	1	1	1	465.269	928.523	2	928.523	0.0002	0	46.29	0.00021	K	LLGVTSDPK	S			File11924 Spectrum8305 scans: 6672
IRX14GFP rep1	GFPtrap_IRX14GFP_Callus_270914_rep1	44	AT1G27600	IRX9L	263	45329	14	14	6	6	12.7	3090	1	1	1	565.277	1128.54	2	1128.54	0.0012	0	34.4	0.0023	R	AMQAYYLNR	V			File11924 Spectrum10084 scans: 7538
IRX14GFP rep1	GFPtrap_IRX14GFP_Callus_270914_rep1	44	AT1G27600	IRX9L	263	45329	14	14	6	6	12.7	3199	1	1	1	573.273	1144.53	2	1144.53	-0.0023	0	22.63	0.025	R	AMQAYYLNR	V	Oxidation (M)	0.010000000.0	File11924 Spectrum8014 scans: 6343
IRX14GFP rep1	GFPtrap_IRX14GFP_Callus_270914_rep1	44	AT1G27600	IRX9L	263	45329	14	14	6	6	12.7	3200	1	1	1	573.274	1144.53	2	1144.53	-0.0006	0	33.37	0.0021	R	AMQAYYLNR	V	Oxidation (M)	0.010000000.0	File11924 Spectrum7875 scans: 6193
IRX14GFP rep1	GFPtrap_IRX14GFP_Callus_270914_rep1	44	AT1G27600	IRX9L	263	45329	14	14	6	6	12.7	3201	1	1	1	573.274	1144.53	2	1144.53	0.0003	0	36.15	0.0011	R	AMQAYYLNR	V	Oxidation (M)	0.010000000.0	File11924 Spectrum7755 scans: 6062
IRX14GFP rep1	GFPtrap_IRX14GFP_Callus_270914_rep1	44	AT1G27600	IRX9L	263	45329	14	14	6	6	12.7	4326	1	1	1	644.882	1287.75	2	1287.76	-0.005	0	42.83	0.0003	K	LLIVVTPTYNR	A			File11924 Spectrum13855 scans: 9428
IRX14GFP rep1	GFPtrap_IRX14GFP_Callus_270914_rep1	44	AT1G27600	IRX9L	263	45329	14	14	6	6	12.7	4327	1	1	1	644.884	1287.75	2	1287.76	-0.0014	0	43.33	0.00026	K	LLIVVTPTYNR	A			File11924 Spectrum13974 scans: 9559
IRX14GFP rep1	GFPtrap_IRX14GFP_Callus_270914_rep1	44	AT1G27600	IRX9L	263	45329	14	14	6	6	12.7	4328	1	1	1	644.885	1287.75	2	1287.76	-0.0003	0	38.86	0.00064	K	LLIVVTPTYNR	A			File11924 Spectrum13719 scans: 9282
IRX14GFP rep1	GFPtrap_IRX14GFP_Callus_270914_rep1	44	AT1G27600	IRX9L	263	45329	14	14	6	6	12.7	4329	1	1	1	644.885	1287.76	2	1287.76	-0.0001	0	43.3	0.00023	K	LLIVVTPTYNR	A			File11924 Spectrum13596 scans: 9142
IRX14GFP rep1	GFPtrap_IRX14GFP_Callus_270914_rep1	44	AT1G27600	IRX9L	263	45329	14	14	6	6	12.7	5350	1	1	1	472.957	1415.85	3	1415.85	-0.0017	1	21.14	0.02	K	KLLIVVTPTYNR	A			File11924 Spectrum15575 scans: 10187
IRX14GFP rep1	GFPtrap_IRX14GFP_Callus_270914_rep1	44	AT1G27600	IRX9L	263	45329	14	14	6	6	12.7	5351	1	1	1	472.957	1415.85	3	1415.85	-0.0008	1	37.92	0.0004	K	KLLIVVTPTYNR	A			File11924 Spectrum10295 scans: 7762
IRX14GFP rep1	GFPtrap_IRX14GFP_Callus_270914_rep1	44	AT1G27600	IRX9L	263	45329	14	14	6	6	12.7	5491	1	1	1	718.372	1434.73	2	1434.73	-0.0036	0	49.35	0.00014	R	FGTWPVAMLAQSK	N			File11924 Spectrum16375 scans: 11116
IRX14GFP rep2	GFPtrap_IRX14GFP_Callus_210215_rep2	14	AT4G36890	IRX14	653	59347	17	16	6	6	14.1	2745	1	1	1	524.73	1047.44	2	1047.44	0.0002	0	45.4	6.1e-05	R	MPNTWEDR	S			File5070 Spectrum5498 scans: 7035
IRX14GFP rep2	GFPtrap_IRX14GFP_Callus_210215_rep2	14	AT4G36890	IRX14	653	59347	17	16	6	6	14.1	2746	1	1	1	524.731	1047.45	2	1047.44	0.0025	0	48.22	3e-05	R	MPNTWEDR	S			File5070 Spectrum5373 scans: 6898
IRX14GFP rep2	GFPtrap_IRX14GFP_Callus_210215_rep2	14	AT4G36890	IRX14	653	59347	17	16	6	6	14.1	2882	1	1	1	532.726	1063.44	2	1063.44	-0.001	0	44.65	3.9e-05	R	MPNTWEDR	S	Oxidation (M)	0.10000000.0	File5070 Spectrum4708 scans: 6177
IRX14GFP rep2	GFPtrap_IRX14GFP_Callus_210215_rep2	14	AT4G36890	IRX14	653	59347	17	16	6	6	14.1	2883	1	1	1	532.726	1063.44	2	1063.44	-0.001	0	29.17	0.0014	R	MPNTWEDR	S	Oxidation (M)	0.10000000.0	File5070 Spectrum4694 scans: 6163
IRX14GFP rep2	GFPtrap_IRX14GFP_Callus_210215_rep2	14	AT4G36890	IRX14	653	59347	17	16	6	6	14.1	2884	1	1	1	532.727	1063.44	2	1063.44	-0.0003	0	52.89	5.9e-06	R	MPNTWEDR	S	Oxidation (M)	0.10000000.0	File5070 Spectrum4390 scans: 5830
IRX14GFP rep2	GFPtrap_IRX14GFP_Callus_210215_rep2	14	AT4G36890	IRX14	653	59347	17	16	6	6	14.1	4978	1	1	1	625.352	1248.69	2	1248.69	0.0001	0	46.44	0.00018	K	MVIAVTPTYVR	T			File5070 Spectrum7709 scans: 9412
IRX14GFP rep2	GFPtrap_IRX14GFP_Callus_210215_rep2	14	AT4G36890	IRX14	653	59347	17	16	6	6	14.1	4979	1	1	1	625.353	1248.69	2	1248.69	0.0012	0	47.32	0.00014	K	MVIAVTPTYVR	T			File5070 Spectrum7573 scans: 9264
IRX14GFP rep2	GFPtrap_IRX14GFP_Callus_210215_rep2	14	AT4G36890	IRX14	653	59347	17	16	6	6	14.1	5172	1	1	1	633.349	1264.68	2	1264.68	-0.0009	0	50.98	7.3e-05	K	MVIAVTPTYVR	T	Oxidation (M)	0.10000000000.0	File5070 Spectrum6778 scans: 8427
IRX14GFP rep2	GFPtrap_IRX14GFP_Callus_210215_rep2	14	AT4G36890	IRX14	653	59347	17	16	6	6	14.1	5173	1	1	1	633.35	1264.68	2	1264.68	-0.0002	0	37.13	0.0017	K	MVIAVTPTYVR	T	Oxidation (M)	0.10000000000.0	File5070 Spectrum6913 scans: 8569
IRX14GFP rep2	GFPtrap_IRX14GFP_Callus_210215_rep2	14	AT4G36890	IRX14	653	59347	17	16	6	6	14.1	5660	1	1	1	654.344	1306.67	2	1306.67	0.0068	0	71.22	9.3e-07	K	LEWSGFVLNSR	L			File5070 Spectrum9184 scans: 10993
IRX14GFP rep2	GFPtrap_IRX14GFP_Callus_210215_rep2	14	AT4G36890	IRX14	653	59347	17	16	6	6	14.1	6490	1	1	1	702.818	1403.62	2	1403.62	0.0035	0	47.09	5.4e-05	K	DPSMVEPLGSCGR	Q			File5070 Spectrum6840 scans: 8492
IRX14GFP rep2	GFPtrap_IRX14GFP_Callus_210215_rep2	14	AT4G36890	IRX14	653	59347	17	16	6	6	14.1	6605	1	1	1	710.812	1419.61	2	1419.61	-0.0024	0	80.75	2.1e-08	K	DPSMVEPLGSCGR	Q	Oxidation (M)	0.0001000000000.0	File5070 Spectrum5714 scans: 7270
IRX14GFP rep2	GFPtrap_IRX14GFP_Callus_210215_rep2	14	AT4G36890	IRX14	653	59347	17	16	6	6	14.1	7850	1	1	1	530.29	1587.85	3	1587.85	-0.0031	0	47.67	0.0002	K	SAVYIDDVAAVLPQK	L			File5070 Spectrum8801 scans: 10579
IRX14GFP rep2	GFPtrap_IRX14GFP_Callus_210215_rep2	14	AT4G36890	IRX14	653	59347	17	16	6	6	14.1	7851	1	1	1	794.932	1587.85	2	1587.85	-0.0006	0	89.8	1.3e-08	K	SAVYIDDVAAVLPQK	L			File5070 Spectrum8788 scans: 10566
IRX14GFP rep2	GFPtrap_IRX14GFP_Callus_210215_rep2	14	AT4G36890	IRX14	653	59347	17	16	6	6	14.1	7852	1	1	1	794.935	1587.86	2	1587.85	0.0051	0	20.3	0.1	K	SAVYIDDVAAVLPQK	L			File5070 Spectrum8924 scans: 10709
IRX14GFP rep2	GFPtrap_IRX14GFP_Callus_210215_rep2	14	AT4G36890	IRX14	653	59347	17	16	6	6	14.1	8465	1	1	1	863.463	1724.91	2	1724.91	-0.001	0	97.86	1.8e-09	K	DQMPLSQGNTVVVIPK	Q			File5070 Spectrum8219 scans: 9957
IRX14GFP rep2	GFPtrap_IRX14GFP_Callus_210215_rep2	14	AT4G36890	IRX14	653	59347	17	16	6	6	14.1	8509	1	1	1	871.461	1740.91	2	1740.91	-0.0014	0	89.9	9.7e-09	K	DQMPLSQGNTVVVIPK	Q	Oxidation (M)	0.0010000000000000.0	File5070 Spectrum7534 scans: 9223
IRX14GFP rep2	GFPtrap_IRX14GFP_Callus_210215_rep2	64	AT5G61840	IRX10L	327	47677	9	9	7	7	17.6	1004	1	1	1	437.246	872.478	2	872.479	-0.0009	0	41.41	0.0012	R	LLANPSMK	Q			File5070 Spectrum5090 scans: 6594
IRX14GFP rep2	GFPtrap_IRX14GFP_Callus_210215_rep2	64	AT5G61840	IRX10L	327	47677	9	9	7	7	17.6	1303	1	1	1	455.298	908.581	2	908.581	0.0005	0	29.21	0.0012	R	GILPLLQR	A			File5070 Spectrum8737 scans: 10512
IRX14GFP rep2	GFPtrap_IRX14GFP_Callus_210215_rep2	64	AT5G61840	IRX10L	327	47677	9	9	7	7	17.6	1394	1	1	1	459.774	917.533	2	917.533	-0.0005	0	51.08	7.5e-05	R	FLLSSPVR	T			File5070 Spectrum7350 scans: 9029
IRX14GFP rep2	GFPtrap_IRX14GFP_Callus_210215_rep2	64	AT5G61840	IRX10L	327	47677	9	9	7	7	17.6	1395	1	1	1	459.774	917.534	2	917.533	0.0005	0	53.32	4.5e-05	R	FLLSSPVR	T			File5070 Spectrum7484 scans: 9170
IRX14GFP rep2	GFPtrap_IRX14GFP_Callus_210215_rep2	64	AT5G61840	IRX10L	327	47677	9	9	7	7	17.6	3051	1	1	1	541.301	1080.59	2	1080.59	0.0022	0	48.41	0.0001	K	VFVYELPSK	Y			File5070 Spectrum7480 scans: 9166
IRX14GFP rep2	GFPtrap_IRX14GFP_Callus_210215_rep2	64	AT5G61840	IRX10L	327	47677	9	9	7	7	17.6	3496	1	1	1	560.809	1119.6	2	1119.6	-0.0002	0	56.85	3.1e-05	R	ATLVQTFGQR	N			File5070 Spectrum6555 scans: 8191
IRX14GFP rep2	GFPtrap_IRX14GFP_Callus_210215_rep2	64	AT5G61840	IRX10L	327	47677	9	9	7	7	17.6	3497	1	1	1	560.809	1119.6	2	1119.6	0.0008	0	46.87	0.00027	R	ATLVQTFGQR	N			File5070 Spectrum6684 scans: 8328
IRX14GFP rep2	GFPtrap_IRX14GFP_Callus_210215_rep2	64	AT5G61840	IRX10L	327	47677	9	9	7	7	17.6	7090	1	1	1	742.394	1482.77	2	1482.77	0.0015	0	32.97	0.0042	K	EGSITVPPYAPPQK	M			File5070 Spectrum6719 scans: 8365
IRX14GFP rep2	GFPtrap_IRX14GFP_Callus_210215_rep2	64	AT5G61840	IRX10L	327	47677	9	9	7	7	17.6	7834	1	1	1	793.886	1585.76	2	1585.76	-0.0016	0	124.02	3.6e-12	R	ISGSAGDVLEDDPVGR	L			File5070 Spectrum6942 scans: 8599
IRX14GFP rep2	GFPtrap_IRX14GFP_Callus_210215_rep2	168	AT1G27600	IRX9L	166	45329	8	7	4	4	8.6	1400	1	1	1	460.727	919.439	2	919.44	-0.0004	0	46.93	0.00018	K	QPYVEER	L			File5070 Spectrum3916 scans: 5307
IRX14GFP rep2	GFPtrap_IRX14GFP_Callus_210215_rep2	168	AT1G27600	IRX9L	166	45329	8	7	4	4	8.6	1464	1	1	1	465.268	928.521	2	928.523	-0.0016	0	44.32	0.00039	K	LLGVTSDPK	S			File5070 Spectrum5720 scans: 7279
IRX14GFP rep2	GFPtrap_IRX14GFP_Callus_210215_rep2	168	AT1G27600	IRX9L	166	45329	8	7	4	4	8.6	1465	1	1	1	465.269	928.523	2	928.523	0.0002	0	20.81	0.073	K	LLGVTSDPK	S			File5070 Spectrum5837 scans: 7417
IRX14GFP rep2	GFPtrap_IRX14GFP_Callus_210215_rep2	168	AT1G27600	IRX9L	166	45329	8	7	4	4	8.6	2741	1	1	1	524.297	1046.58	2	1046.58	-0.0003	0	24.29	0.044	K	NLQALITMK	-	Oxidation (M)	0.000000010.0	File5070 Spectrum7004 scans: 8664
IRX14GFP rep2	GFPtrap_IRX14GFP_Callus_210215_rep2	168	AT1G27600	IRX9L	166	45329	8	7	4	4	8.6	3589	1	1	1	565.277	1128.54	2	1128.54	0.0002	0	49.98	6.4e-05	R	AMQAYYLNR	V			File5070 Spectrum6164 scans: 7771
IRX14GFP rep2	GFPtrap_IRX14GFP_Callus_210215_rep2	168	AT1G27600	IRX9L	166	45329	8	7	4	4	8.6	3590	1	1	1	565.277	1128.54	2	1128.54	0.0006	0	42.07	0.00039	R	AMQAYYLNR	V			File5070 Spectrum6029 scans: 7628
IRX14GFP rep2	GFPtrap_IRX14GFP_Callus_210215_rep2	168	AT1G27600	IRX9L	166	45329	8	7	4	4	8.6	3797	1	1	1	573.274	1144.53	2	1144.53	-0.0008	0	29.36	0.0054	R	AMQAYYLNR	V	Oxidation (M)	0.010000000.0	File5070 Spectrum5411 scans: 6940
IRX14GFP rep2	GFPtrap_IRX14GFP_Callus_210215_rep2	168	AT1G27600	IRX9L	166	45329	8	7	4	4	8.6	3798	1	1	1	573.274	1144.53	2	1144.53	-0.0006	0	44.7	0.00016	R	AMQAYYLNR	V	Oxidation (M)	0.010000000.0	File5070 Spectrum5187 scans: 6699
IRX14GFP rep3	GFPtrap_IRX14GFP_Callus_240215_rep3	3	AT4G36890	IRX14	910	59347	41	37	16	16	30.1	85	1	1	1	397.715	793.416	2	793.416	0.0001	0	31.08	0.0089	K	LEVFMR	L			File4990 Spectrum5125 scans: 7781
IRX14GFP rep3	GFPtrap_IRX14GFP_Callus_240215_rep3	3	AT4G36890	IRX14	910	59347	41	37	16	16	30.1	718	1	1	1	519.788	1037.56	2	1037.56	-0.0003	0	32.12	0.0056	R	TIHVGIDQR	M			File4990 Spectrum3373 scans: 5601
IRX14GFP rep3	GFPtrap_IRX14GFP_Callus_240215_rep3	3	AT4G36890	IRX14	910	59347	41	37	16	16	30.1	761	1	1	1	524.729	1047.44	2	1047.44	-0.0007	0	54.58	7.7e-06	R	MPNTWEDR	S			File4990 Spectrum3982 scans: 6333
IRX14GFP rep3	GFPtrap_IRX14GFP_Callus_240215_rep3	3	AT4G36890	IRX14	910	59347	41	37	16	16	30.1	762	1	1	1	524.73	1047.45	2	1047.44	0.0018	0	50.32	1.9e-05	R	MPNTWEDR	S			File4990 Spectrum4081 scans: 6454
IRX14GFP rep3	GFPtrap_IRX14GFP_Callus_240215_rep3	3	AT4G36890	IRX14	910	59347	41	37	16	16	30.1	1717	1	1	1	633.35	1264.69	2	1264.68	0.0007	0	35.83	0.0023	K	MVIAVTPTYVR	T	Oxidation (M)	0.10000000000.0	File4990 Spectrum5081 scans: 7720
IRX14GFP rep3	GFPtrap_IRX14GFP_Callus_240215_rep3	3	AT4G36890	IRX14	910	59347	41	37	16	16	30.1	1951	1	1	1	654.34	1306.67	2	1306.67	-0.0013	0	68.5	2e-06	K	LEWSGFVLNSR	L			File4990 Spectrum7341 scans: 10321
IRX14GFP rep3	GFPtrap_IRX14GFP_Callus_240215_rep3	3	AT4G36890	IRX14	910	59347	41	37	16	16	30.1	1952	1	1	1	436.563	1306.67	3	1306.67	-0.0009	0	37.38	0.0025	K	LEWSGFVLNSR	L			File4990 Spectrum7342 scans: 10322
IRX14GFP rep3	GFPtrap_IRX14GFP_Callus_240215_rep3	3	AT4G36890	IRX14	910	59347	41	37	16	16	30.1	2540	1	1	1	702.816	1403.62	2	1403.62	-0.0007	0	55.44	7.6e-06	K	DPSMVEPLGSCGR	Q			File4990 Spectrum5239 scans: 7911
IRX14GFP rep3	GFPtrap_IRX14GFP_Callus_240215_rep3	3	AT4G36890	IRX14	910	59347	41	37	16	16	30.1	2614	1	1	1	710.814	1419.61	2	1419.61	0.0014	0	20.47	0.025	K	DPSMVEPLGSCGR	Q	Oxidation (M)	0.0001000000000.0	File4990 Spectrum4287 scans: 6759
IRX14GFP rep3	GFPtrap_IRX14GFP_Callus_240215_rep3	3	AT4G36890	IRX14	910	59347	41	37	16	16	30.1	2806	1	1	1	730.874	1459.73	2	1459.73	-0.0009	0	20.92	0.096	R	TPWPDVPPEPPTK	K			File4990 Spectrum5942 scans: 8738
IRX14GFP rep3	GFPtrap_IRX14GFP_Callus_240215_rep3	3	AT4G36890	IRX14	910	59347	41	37	16	16	30.1	2807	1	1	1	730.875	1459.74	2	1459.73	0.0006	0	31.95	0.0079	R	TPWPDVPPEPPTK	K			File4990 Spectrum5722 scans: 8482
IRX14GFP rep3	GFPtrap_IRX14GFP_Callus_240215_rep3	3	AT4G36890	IRX14	910	59347	41	37	16	16	30.1	2809	1	1	1	730.876	1459.74	2	1459.73	0.0025	0	37.96	0.0021	R	TPWPDVPPEPPTK	K			File4990 Spectrum5825 scans: 8604
IRX14GFP rep3	GFPtrap_IRX14GFP_Callus_240215_rep3	3	AT4G36890	IRX14	910	59347	41	37	16	16	30.1	3377	1	1	1	794.932	1587.85	2	1587.85	-0.0005	0	29.2	0.014	K	SAVYIDDVAAVLPQK	L			File4990 Spectrum6586 scans: 9461
IRX14GFP rep3	GFPtrap_IRX14GFP_Callus_240215_rep3	3	AT4G36890	IRX14	910	59347	41	37	16	16	30.1	3378	1	1	1	794.933	1587.85	2	1587.85	-0.0004	0	89.33	1.4e-08	K	SAVYIDDVAAVLPQK	L			File4990 Spectrum7018 scans: 9956
IRX14GFP rep3	GFPtrap_IRX14GFP_Callus_240215_rep3	3	AT4G36890	IRX14	910	59347	41	37	16	16	30.1	3379	1	1	1	530.291	1587.85	3	1587.85	0.0004	0	34.44	0.0043	K	SAVYIDDVAAVLPQK	L			File4990 Spectrum7009 scans: 9944
IRX14GFP rep3	GFPtrap_IRX14GFP_Callus_240215_rep3	3	AT4G36890	IRX14	910	59347	41	37	16	16	30.1	3476	1	1	1	539.618	1615.83	3	1615.84	-0.0028	1	21.74	0.08	K	RTPWPDVPPEPPTK	K			File4990 Spectrum4997 scans: 7617
IRX14GFP rep3	GFPtrap_IRX14GFP_Callus_240215_rep3	3	AT4G36890	IRX14	910	59347	41	37	16	16	30.1	3477	1	1	1	539.62	1615.84	3	1615.84	0.001	1	22.19	0.074	K	RTPWPDVPPEPPTK	K			File4990 Spectrum4890 scans: 7493
IRX14GFP rep3	GFPtrap_IRX14GFP_Callus_240215_rep3	3	AT4G36890	IRX14	910	59347	41	37	16	16	30.1	3478	1	1	1	539.62	1615.84	3	1615.84	0.0016	1	30.25	0.012	K	RTPWPDVPPEPPTK	K			File4990 Spectrum4780 scans: 7367
IRX14GFP rep3	GFPtrap_IRX14GFP_Callus_240215_rep3	3	AT4G36890	IRX14	910	59347	41	37	16	16	30.1	3480	1	1	1	539.62	1615.84	3	1615.84	0.0019	1	26.85	0.025	K	RTPWPDVPPEPPTK	K			File4990 Spectrum5095 scans: 7739
IRX14GFP rep3	GFPtrap_IRX14GFP_Callus_240215_rep3	3	AT4G36890	IRX14	910	59347	41	37	16	16	30.1	3895	1	1	1	863.464	1724.91	2	1724.91	0	0	57.23	1.9e-05	K	DQMPLSQGNTVVVIPK	Q			File4990 Spectrum6492 scans: 9360
IRX14GFP rep3	GFPtrap_IRX14GFP_Callus_240215_rep3	3	AT4G36890	IRX14	910	59347	41	37	16	16	30.1	3896	1	1	1	575.979	1724.91	3	1724.91	0.0019	0	27.71	0.018	K	DQMPLSQGNTVVVIPK	Q			File4990 Spectrum6493 scans: 9361
IRX14GFP rep3	GFPtrap_IRX14GFP_Callus_240215_rep3	3	AT4G36890	IRX14	910	59347	41	37	16	16	30.1	3947	1	1	1	581.311	1740.91	3	1740.91	0.0034	0	37.76	0.0015	K	DQMPLSQGNTVVVIPK	Q	Oxidation (M)	0.0010000000000000.0	File4990 Spectrum5828 scans: 8608
IRX14GFP rep3	GFPtrap_IRX14GFP_Callus_240215_rep3	3	AT4G36890	IRX14	910	59347	41	37	16	16	30.1	4058	1	1	1	590.973	1769.9	3	1769.9	-0.001	0	49.83	0.00011	R	LLWEEAENKPEWVK	D			File4990 Spectrum5881 scans: 8670
IRX14GFP rep3	GFPtrap_IRX14GFP_Callus_240215_rep3	3	AT4G36890	IRX14	910	59347	41	37	16	16	30.1	4060	1	1	1	885.957	1769.9	2	1769.9	0.0006	0	48.73	0.00014	R	LLWEEAENKPEWVK	D			File4990 Spectrum5906 scans: 8698
IRX14GFP rep3	GFPtrap_IRX14GFP_Callus_240215_rep3	3	AT4G36890	IRX14	910	59347	41	37	16	16	30.1	4061	1	1	1	590.974	1769.9	3	1769.9	0.0008	0	51.3	7.6e-05	R	LLWEEAENKPEWVK	D			File4990 Spectrum6005 scans: 8808
IRX14GFP rep3	GFPtrap_IRX14GFP_Callus_240215_rep3	3	AT4G36890	IRX14	910	59347	41	37	16	16	30.1	4366	1	1	1	618.678	1853.01	3	1853.01	0.0026	1	41.28	0.00062	K	KDQMPLSQGNTVVVIPK	Q			File4990 Spectrum5216 scans: 7886
IRX14GFP rep3	GFPtrap_IRX14GFP_Callus_240215_rep3	3	AT4G36890	IRX14	910	59347	41	37	16	16	30.1	4825	1	1	1	496.284	1981.11	4	1981.1	0.0029	2	52.57	2.3e-05	K	KKDQMPLSQGNTVVVIPK	Q			File4990 Spectrum4547 scans: 7092
IRX14GFP rep3	GFPtrap_IRX14GFP_Callus_240215_rep3	3	AT4G36890	IRX14	910	59347	41	37	16	16	30.1	4966	1	1	1	505.994	2019.95	4	2019.95	-0.0023	0	37.95	0.0012	K	HEPRPTDTTTQVYSSSSK	H			File4990 Spectrum2823 scans: 4957
IRX14GFP rep3	GFPtrap_IRX14GFP_Callus_240215_rep3	3	AT4G36890	IRX14	910	59347	41	37	16	16	30.1	4967	1	1	1	674.323	2019.95	3	2019.95	-0.0013	0	20.58	0.07	K	HEPRPTDTTTQVYSSSSK	H			File4990 Spectrum2824 scans: 4958
IRX14GFP rep3	GFPtrap_IRX14GFP_Callus_240215_rep3	3	AT4G36890	IRX14	910	59347	41	37	16	16	30.1	4969	1	1	1	674.323	2019.95	3	2019.95	-0.0011	0	70.35	7.4e-07	K	HEPRPTDTTTQVYSSSSK	H			File4990 Spectrum2712 scans: 4831
IRX14GFP rep3	GFPtrap_IRX14GFP_Callus_240215_rep3	3	AT4G36890	IRX14	910	59347	41	37	16	16	30.1	4970	1	1	1	674.324	2019.95	3	2019.95	-0.0004	0	71.02	6.4e-07	K	HEPRPTDTTTQVYSSSSK	H			File4990 Spectrum2601 scans: 4704
IRX14GFP rep3	GFPtrap_IRX14GFP_Callus_240215_rep3	3	AT4G36890	IRX14	910	59347	41	37	16	16	30.1	4971	1	1	1	505.995	2019.95	4	2019.95	-0.0002	0	36.99	0.0016	K	HEPRPTDTTTQVYSSSSK	H			File4990 Spectrum2711 scans: 4830
IRX14GFP rep3	GFPtrap_IRX14GFP_Callus_240215_rep3	3	AT4G36890	IRX14	910	59347	41	37	16	16	30.1	4973	1	1	1	505.995	2019.95	4	2019.95	0.0008	0	43.69	0.00035	K	HEPRPTDTTTQVYSSSSK	H			File4990 Spectrum2602 scans: 4705
IRX14GFP rep3	GFPtrap_IRX14GFP_Callus_240215_rep3	3	AT4G36890	IRX14	910	59347	41	37	16	16	30.1	5809	1	1	1	559.776	2235.07	4	2235.08	-0.0019	1	44.01	0.00039	K	SKHEPRPTDTTTQVYSSSSK	H			File4990 Spectrum3001 scans: 5159
IRX14GFP rep3	GFPtrap_IRX14GFP_Callus_240215_rep3	3	AT4G36890	IRX14	910	59347	41	37	16	16	30.1	5810	1	1	1	559.776	2235.08	4	2235.08	-0.0016	1	41.5	0.00069	K	SKHEPRPTDTTTQVYSSSSK	H			File4990 Spectrum2664 scans: 4776
IRX14GFP rep3	GFPtrap_IRX14GFP_Callus_240215_rep3	3	AT4G36890	IRX14	910	59347	41	37	16	16	30.1	5812	1	1	1	559.776	2235.08	4	2235.08	-0.0009	1	43.9	0.0004	K	SKHEPRPTDTTTQVYSSSSK	H			File4990 Spectrum2770 scans: 4898
IRX14GFP rep3	GFPtrap_IRX14GFP_Callus_240215_rep3	3	AT4G36890	IRX14	910	59347	41	37	16	16	30.1	5813	1	1	1	559.776	2235.08	4	2235.08	-0.0009	1	45.14	0.0003	K	SKHEPRPTDTTTQVYSSSSK	H			File4990 Spectrum2436 scans: 4520
IRX14GFP rep3	GFPtrap_IRX14GFP_Callus_240215_rep3	3	AT4G36890	IRX14	910	59347	41	37	16	16	30.1	5815	1	1	1	559.776	2235.08	4	2235.08	-0.0006	1	40.11	0.00095	K	SKHEPRPTDTTTQVYSSSSK	H			File4990 Spectrum2548 scans: 4646
IRX14GFP rep3	GFPtrap_IRX14GFP_Callus_240215_rep3	3	AT4G36890	IRX14	910	59347	41	37	16	16	30.1	5817	1	1	1	559.776	2235.08	4	2235.08	-0.0004	1	25.26	0.029	K	SKHEPRPTDTTTQVYSSSSK	H			File4990 Spectrum3203 scans: 5399
IRX14GFP rep3	GFPtrap_IRX14GFP_Callus_240215_rep3	3	AT4G36890	IRX14	910	59347	41	37	16	16	30.1	5820	1	1	1	559.777	2235.08	4	2235.08	0.0001	1	28.93	0.012	K	SKHEPRPTDTTTQVYSSSSK	H			File4990 Spectrum2891 scans: 5032
IRX14GFP rep3	GFPtrap_IRX14GFP_Callus_240215_rep3	3	AT4G36890	IRX14	910	59347	41	37	16	16	30.1	8368	1	1	1	950.727	3798.88	4	3798.9	-0.0194	1	25.69	0.019	R	LLWEEAENKPEWVKDFGSLNENEGVESPLSLLK	D			File4990 Spectrum8345 scans: 11430
IRX14GFP rep3	GFPtrap_IRX14GFP_Callus_240215_rep3	4	AT5G61840	IRX10L	331	47677	12	12	11	11	30.1	14	1	1	1	385.702	769.39	2	769.39	-0.0003	0	36.13	0.00085	R	NHVCLK	E			File4990 Spectrum1274 scans: 3234
IRX14GFP rep3	GFPtrap_IRX14GFP_Callus_240215_rep3	4	AT5G61840	IRX10L	331	47677	12	12	11	11	30.1	402	1	1	1	455.298	908.58	2	908.581	-0.0003	0	33	0.0005	R	GILPLLQR	A			File4990 Spectrum6793 scans: 9692
IRX14GFP rep3	GFPtrap_IRX14GFP_Callus_240215_rep3	4	AT5G61840	IRX10L	331	47677	12	12	11	11	30.1	427	1	1	1	466.255	930.496	2	930.496	-0.0003	0	28.16	0.027	R	SIFVYFR	G			File4990 Spectrum6907 scans: 9828
IRX14GFP rep3	GFPtrap_IRX14GFP_Callus_240215_rep3	4	AT5G61840	IRX10L	331	47677	12	12	11	11	30.1	502	1	1	1	482.748	963.481	2	963.481	0.0001	0	24.7	0.045	R	AAVWENFK	D			File4990 Spectrum5337 scans: 8034
IRX14GFP rep3	GFPtrap_IRX14GFP_Callus_240215_rep3	4	AT5G61840	IRX10L	331	47677	12	12	11	11	30.1	763	1	1	1	524.793	1047.57	2	1047.57	0.0006	0	32.66	0.0066	R	SVYLRPGEK	L			File4990 Spectrum2586 scans: 4688
IRX14GFP rep3	GFPtrap_IRX14GFP_Callus_240215_rep3	4	AT5G61840	IRX10L	331	47677	12	12	11	11	30.1	895	1	1	1	541.299	1080.58	2	1080.59	-0.002	0	57.7	1.4e-05	K	VFVYELPSK	Y			File4990 Spectrum5684 scans: 8437
IRX14GFP rep3	GFPtrap_IRX14GFP_Callus_240215_rep3	4	AT5G61840	IRX10L	331	47677	12	12	11	11	30.1	1063	1	1	1	560.81	1119.6	2	1119.6	0.001	0	45.5	0.00037	R	ATLVQTFGQR	N			File4990 Spectrum4876 scans: 7477
IRX14GFP rep3	GFPtrap_IRX14GFP_Callus_240215_rep3	4	AT5G61840	IRX10L	331	47677	12	12	11	11	30.1	2962	1	1	1	742.392	1482.77	2	1482.77	-0.0024	0	34.37	0.0031	K	EGSITVPPYAPPQK	M			File4990 Spectrum5077 scans: 7716
IRX14GFP rep3	GFPtrap_IRX14GFP_Callus_240215_rep3	4	AT5G61840	IRX10L	331	47677	12	12	11	11	30.1	3365	1	1	1	793.887	1585.76	2	1585.76	0.0014	0	71.15	7.7e-07	R	ISGSAGDVLEDDPVGR	L			File4990 Spectrum5300 scans: 7986
IRX14GFP rep3	GFPtrap_IRX14GFP_Callus_240215_rep3	4	AT5G61840	IRX10L	331	47677	12	12	11	11	30.1	4490	1	1	1	946.926	1891.84	2	1891.84	-0.0007	0	100.77	3.1e-10	R	GLFYDVGNDPEGGYYAR	G			File4990 Spectrum6753 scans: 9648
IRX14GFP rep3	GFPtrap_IRX14GFP_Callus_240215_rep3	4	AT5G61840	IRX10L	331	47677	12	12	11	11	30.1	4491	1	1	1	631.62	1891.84	3	1891.84	0.0003	0	51.18	2.9e-05	R	GLFYDVGNDPEGGYYAR	G			File4990 Spectrum6772 scans: 9668
IRX14GFP rep3	GFPtrap_IRX14GFP_Callus_240215_rep3	4	AT5G61840	IRX10L	331	47677	12	12	11	11	30.1	8219	1	1	1	880.156	3516.6	4	3516.59	0.0032	1	28.1	0.0058	R	AAVWENFKDNPLFDISTEHPTTYYEDMQR	A			File4990 Spectrum7621 scans: 10633
IRX14GFP rep3	GFPtrap_IRX14GFP_Callus_240215_rep3	6	AT1G27600	IRX9L	169	45329	8	8	7	7	13.2	15	1	1	1	385.708	769.402	2	769.401	0.001	0	32.46	0.0031	R	FSFEIK	Q			File4990 Spectrum5704 scans: 8460
IRX14GFP rep3	GFPtrap_IRX14GFP_Callus_240215_rep3	6	AT1G27600	IRX9L	169	45329	8	8	7	7	13.2	419	1	1	1	460.727	919.439	2	919.44	-0.0007	0	34.06	0.0036	K	QPYVEER	L			File4990 Spectrum2624 scans: 4730
IRX14GFP rep3	GFPtrap_IRX14GFP_Callus_240215_rep3	6	AT1G27600	IRX9L	169	45329	8	8	7	7	13.2	424	1	1	1	465.268	928.522	2	928.523	-0.0008	0	44.9	0.00034	K	LLGVTSDPK	S			File4990 Spectrum4196 scans: 6637
IRX14GFP rep3	GFPtrap_IRX14GFP_Callus_240215_rep3	6	AT1G27600	IRX9L	169	45329	8	8	7	7	13.2	707	1	1	1	516.3	1030.58	2	1030.58	0.0003	0	39.77	0.0012	K	NLQALITMK	-			File4990 Spectrum6119 scans: 8932
IRX14GFP rep3	GFPtrap_IRX14GFP_Callus_240215_rep3	6	AT1G27600	IRX9L	169	45329	8	8	7	7	13.2	1098	1	1	1	565.277	1128.54	2	1128.54	0.0008	0	46.54	0.00014	R	AMQAYYLNR	V			File4990 Spectrum4448 scans: 6972
IRX14GFP rep3	GFPtrap_IRX14GFP_Callus_240215_rep3	6	AT1G27600	IRX9L	169	45329	8	8	7	7	13.2	1149	1	1	1	573.273	1144.53	2	1144.53	-0.0012	0	33.15	0.0023	R	AMQAYYLNR	V	Oxidation (M)	0.010000000.0	File4990 Spectrum3820 scans: 6139
IRX14GFP rep3	GFPtrap_IRX14GFP_Callus_240215_rep3	6	AT1G27600	IRX9L	169	45329	8	8	7	7	13.2	1839	1	1	1	644.885	1287.76	2	1287.76	-0.0001	0	43.78	0.00021	K	LLIVVTPTYNR	A			File4990 Spectrum6297 scans: 9144
IRX14GFP rep3	GFPtrap_IRX14GFP_Callus_240215_rep3	6	AT1G27600	IRX9L	169	45329	8	8	7	7	13.2	2594	1	1	1	472.957	1415.85	3	1415.85	-0.0005	1	35.21	0.00074	K	KLLIVVTPTYNR	A			File4990 Spectrum5141 scans: 7799
STL1GFP rep1	GFPtrap_STL1GFP_Callus_270914_rep1	2	AT2G41770	STL1	2057	88178	106	102	27	27	34.8	29	1	1	1	382.202	762.388	2	762.391	-0.0028	0	20.79	0.11	K	IWTTDK	V			File11922 Spectrum7519 scans: 6318
STL1GFP rep1	GFPtrap_STL1GFP_Callus_270914_rep1	2	AT2G41770	STL1	2057	88178	106	102	27	27	34.8	30	1	1	1	382.202	762.39	2	762.391	-0.0014	0	21.04	0.1	K	IWTTDK	V			File11922 Spectrum5773 scans: 5412
STL1GFP rep1	GFPtrap_STL1GFP_Callus_270914_rep1	2	AT2G41770	STL1	2057	88178	106	102	27	27	34.8	31	1	1	1	382.202	762.39	2	762.391	-0.0009	0	28.93	0.017	K	IWTTDK	V			File11922 Spectrum5978 scans: 5675
STL1GFP rep1	GFPtrap_STL1GFP_Callus_270914_rep1	2	AT2G41770	STL1	2057	88178	106	102	27	27	34.8	32	1	1	1	382.203	762.391	2	762.391	-0.0004	0	29.02	0.017	K	IWTTDK	V			File11922 Spectrum5882 scans: 5550
STL1GFP rep1	GFPtrap_STL1GFP_Callus_270914_rep1	2	AT2G41770	STL1	2057	88178	106	102	27	27	34.8	33	1	1	1	382.203	762.391	2	762.391	0	0	29.65	0.015	K	IWTTDK	V			File11922 Spectrum7763 scans: 6595
STL1GFP rep1	GFPtrap_STL1GFP_Callus_270914_rep1	2	AT2G41770	STL1	2057	88178	106	102	27	27	34.8	34	1	1	1	382.203	762.392	2	762.391	0.0005	0	20.54	0.12	K	IWTTDK	V			File11922 Spectrum6180 scans: 5928
STL1GFP rep1	GFPtrap_STL1GFP_Callus_270914_rep1	2	AT2G41770	STL1	2057	88178	106	102	27	27	34.8	742	1	1	1	434.194	866.374	2	866.377	-0.0031	0	20.92	0.04	K	IYDADDR	G			File11922 Spectrum4280 scans: 4855
STL1GFP rep1	GFPtrap_STL1GFP_Callus_270914_rep1	2	AT2G41770	STL1	2057	88178	106	102	27	27	34.8	744	1	1	1	434.196	866.377	2	866.377	0.0003	0	30.09	0.005	K	IYDADDR	G			File11922 Spectrum4043 scans: 4514
STL1GFP rep1	GFPtrap_STL1GFP_Callus_270914_rep1	2	AT2G41770	STL1	2057	88178	106	102	27	27	34.8	1508	1	1	1	487.797	973.58	2	973.581	-0.0012	0	53.48	2.9e-05	K	TVVILSSQK	N			File11922 Spectrum7795 scans: 6635
STL1GFP rep1	GFPtrap_STL1GFP_Callus_270914_rep1	2	AT2G41770	STL1	2057	88178	106	102	27	27	34.8	1509	1	1	1	487.797	973.58	2	973.581	-0.0007	0	53.45	2.9e-05	K	TVVILSSQK	N			File11922 Spectrum7469 scans: 6250
STL1GFP rep1	GFPtrap_STL1GFP_Callus_270914_rep1	2	AT2G41770	STL1	2057	88178	106	102	27	27	34.8	1510	1	1	1	487.797	973.58	2	973.581	-0.0006	0	53.1	3.2e-05	K	TVVILSSQK	N			File11922 Spectrum7682 scans: 6509
STL1GFP rep1	GFPtrap_STL1GFP_Callus_270914_rep1	2	AT2G41770	STL1	2057	88178	106	102	27	27	34.8	1511	1	1	1	487.797	973.58	2	973.581	-0.0006	0	47.5	0.00011	K	TVVILSSQK	N			File11922 Spectrum8109 scans: 7021
STL1GFP rep1	GFPtrap_STL1GFP_Callus_270914_rep1	2	AT2G41770	STL1	2057	88178	106	102	27	27	34.8	1512	1	1	1	487.797	973.58	2	973.581	-0.0005	0	53.15	3.1e-05	K	TVVILSSQK	N			File11922 Spectrum7572 scans: 6380
STL1GFP rep1	GFPtrap_STL1GFP_Callus_270914_rep1	2	AT2G41770	STL1	2057	88178	106	102	27	27	34.8	1513	1	1	1	487.798	973.58	2	973.581	-0.0004	0	36.17	0.0016	K	TVVILSSQK	N			File11922 Spectrum10070 scans: 8089
STL1GFP rep1	GFPtrap_STL1GFP_Callus_270914_rep1	2	AT2G41770	STL1	2057	88178	106	102	27	27	34.8	1514	1	1	1	487.798	973.581	2	973.581	-0.0003	0	46.84	0.00013	K	TVVILSSQK	N			File11922 Spectrum9714 scans: 7686
STL1GFP rep1	GFPtrap_STL1GFP_Callus_270914_rep1	2	AT2G41770	STL1	2057	88178	106	102	27	27	34.8	1515	1	1	1	487.798	973.581	2	973.581	-0.0003	0	47.21	0.00012	K	TVVILSSQK	N			File11922 Spectrum8226 scans: 7152
STL1GFP rep1	GFPtrap_STL1GFP_Callus_270914_rep1	2	AT2G41770	STL1	2057	88178	106	102	27	27	34.8	1516	1	1	1	487.798	973.581	2	973.581	-0.0001	0	34.47	0.0018	K	TVVILSSQK	N			File11922 Spectrum9950 scans: 7952
STL1GFP rep1	GFPtrap_STL1GFP_Callus_270914_rep1	2	AT2G41770	STL1	2057	88178	106	102	27	27	34.8	1517	1	1	1	487.798	973.581	2	973.581	-0.0001	0	53.3	2.3e-05	K	TVVILSSQK	N			File11922 Spectrum6350 scans: 6133
STL1GFP rep1	GFPtrap_STL1GFP_Callus_270914_rep1	2	AT2G41770	STL1	2057	88178	106	102	27	27	34.8	1518	1	1	1	487.798	973.581	2	973.581	-0.0001	0	47.21	9.4e-05	K	TVVILSSQK	N			File11922 Spectrum9475 scans: 7417
STL1GFP rep1	GFPtrap_STL1GFP_Callus_270914_rep1	2	AT2G41770	STL1	2057	88178	106	102	27	27	34.8	1519	1	1	1	487.798	973.581	2	973.581	-0.0001	0	34.24	0.0019	K	TVVILSSQK	N			File11922 Spectrum9834 scans: 7821
STL1GFP rep1	GFPtrap_STL1GFP_Callus_270914_rep1	2	AT2G41770	STL1	2057	88178	106	102	27	27	34.8	1520	1	1	1	487.798	973.581	2	973.581	0	0	33.3	0.0023	K	TVVILSSQK	N			File11922 Spectrum8339 scans: 7282
STL1GFP rep1	GFPtrap_STL1GFP_Callus_270914_rep1	2	AT2G41770	STL1	2057	88178	106	102	27	27	34.8	1521	1	1	1	487.798	973.581	2	973.581	0.0001	0	46.9	0.0001	K	TVVILSSQK	N			File11922 Spectrum9598 scans: 7551
STL1GFP rep1	GFPtrap_STL1GFP_Callus_270914_rep1	2	AT2G41770	STL1	2057	88178	106	102	27	27	34.8	1522	1	1	1	487.798	973.581	2	973.581	0.0004	0	32.53	0.0028	K	TVVILSSQK	N			File11922 Spectrum7898 scans: 6764
STL1GFP rep1	GFPtrap_STL1GFP_Callus_270914_rep1	2	AT2G41770	STL1	2057	88178	106	102	27	27	34.8	1523	1	1	1	487.798	973.582	2	973.581	0.0013	0	47.72	8.4e-05	K	TVVILSSQK	N			File11922 Spectrum8009 scans: 6892
STL1GFP rep1	GFPtrap_STL1GFP_Callus_270914_rep1	2	AT2G41770	STL1	2057	88178	106	102	27	27	34.8	2086	1	1	1	533.282	1064.55	2	1064.55	-0.0002	0	33.09	0.0063	K	TTLEAFDIR	F			File11922 Spectrum13622 scans: 9792
STL1GFP rep1	GFPtrap_STL1GFP_Callus_270914_rep1	2	AT2G41770	STL1	2057	88178	106	102	27	27	34.8	2618	1	1	1	577.813	1153.61	2	1153.61	-0.0011	0	39.05	0.001	K	WNSIPVVPDK	T			File11922 Spectrum11601 scans: 8647
STL1GFP rep1	GFPtrap_STL1GFP_Callus_270914_rep1	2	AT2G41770	STL1	2057	88178	106	102	27	27	34.8	2619	1	1	1	577.813	1153.61	2	1153.61	-0.001	0	41.27	0.0006	K	WNSIPVVPDK	T			File11922 Spectrum11737 scans: 8795
STL1GFP rep1	GFPtrap_STL1GFP_Callus_270914_rep1	2	AT2G41770	STL1	2057	88178	106	102	27	27	34.8	2620	1	1	1	577.813	1153.61	2	1153.61	-0.0008	0	36.6	0.0018	K	WNSIPVVPDK	T			File11922 Spectrum9926 scans: 7926
STL1GFP rep1	GFPtrap_STL1GFP_Callus_270914_rep1	2	AT2G41770	STL1	2057	88178	106	102	27	27	34.8	2621	1	1	1	577.813	1153.61	2	1153.61	-0.0008	0	27.8	0.013	K	WNSIPVVPDK	T			File11922 Spectrum11976 scans: 9064
STL1GFP rep1	GFPtrap_STL1GFP_Callus_270914_rep1	2	AT2G41770	STL1	2057	88178	106	102	27	27	34.8	2622	1	1	1	577.813	1153.61	2	1153.61	-0.0006	0	23.19	0.039	K	WNSIPVVPDK	T			File11922 Spectrum11476 scans: 8513
STL1GFP rep1	GFPtrap_STL1GFP_Callus_270914_rep1	2	AT2G41770	STL1	2057	88178	106	102	27	27	34.8	2623	1	1	1	577.814	1153.61	2	1153.61	-0.0002	0	31.97	0.006	K	WNSIPVVPDK	T			File11922 Spectrum11849 scans: 8924
STL1GFP rep1	GFPtrap_STL1GFP_Callus_270914_rep1	2	AT2G41770	STL1	2057	88178	106	102	27	27	34.8	2698	1	1	1	584.279	1166.54	2	1166.55	-0.0031	0	61.12	5.4e-06	K	NSDLYVEEAK	L			File11922 Spectrum6341 scans: 6122
STL1GFP rep1	GFPtrap_STL1GFP_Callus_270914_rep1	2	AT2G41770	STL1	2057	88178	106	102	27	27	34.8	2699	1	1	1	584.279	1166.54	2	1166.55	-0.0011	0	43.43	0.0003	K	NSDLYVEEAK	L			File11922 Spectrum6133 scans: 5867
STL1GFP rep1	GFPtrap_STL1GFP_Callus_270914_rep1	2	AT2G41770	STL1	2057	88178	106	102	27	27	34.8	2700	1	1	1	584.28	1166.54	2	1166.55	-0.0006	0	45.19	0.0002	K	NSDLYVEEAK	L			File11922 Spectrum7672 scans: 6498
STL1GFP rep1	GFPtrap_STL1GFP_Callus_270914_rep1	2	AT2G41770	STL1	2057	88178	106	102	27	27	34.8	2701	1	1	1	584.28	1166.55	2	1166.55	-0.0002	0	54.56	2.6e-05	K	NSDLYVEEAK	L			File11922 Spectrum7464 scans: 6242
STL1GFP rep1	GFPtrap_STL1GFP_Callus_270914_rep1	2	AT2G41770	STL1	2057	88178	106	102	27	27	34.8	2702	1	1	1	584.28	1166.55	2	1166.55	0.0001	0	27.34	0.014	K	NSDLYVEEAK	L			File11922 Spectrum7868 scans: 6729
STL1GFP rep1	GFPtrap_STL1GFP_Callus_270914_rep1	2	AT2G41770	STL1	2057	88178	106	102	27	27	34.8	2703	1	1	1	584.28	1166.55	2	1166.55	0.0004	0	50.57	6.5e-05	K	NSDLYVEEAK	L			File11922 Spectrum7560 scans: 6367
STL1GFP rep1	GFPtrap_STL1GFP_Callus_270914_rep1	2	AT2G41770	STL1	2057	88178	106	102	27	27	34.8	2704	1	1	1	584.28	1166.55	2	1166.55	0.0005	0	68.63	1.1e-06	K	NSDLYVEEAK	L			File11922 Spectrum6231 scans: 5991
STL1GFP rep1	GFPtrap_STL1GFP_Callus_270914_rep1	2	AT2G41770	STL1	2057	88178	106	102	27	27	34.8	3045	1	1	1	612.81	1223.61	2	1223.61	-0.0013	0	41.19	0.00074	R	IEAYPFVEEK	D			File11922 Spectrum11545 scans: 8586
STL1GFP rep1	GFPtrap_STL1GFP_Callus_270914_rep1	2	AT2G41770	STL1	2057	88178	106	102	27	27	34.8	3046	1	1	1	612.81	1223.61	2	1223.61	-0.0011	0	54.08	3.8e-05	R	IEAYPFVEEK	D			File11922 Spectrum11679 scans: 8732
STL1GFP rep1	GFPtrap_STL1GFP_Callus_270914_rep1	2	AT2G41770	STL1	2057	88178	106	102	27	27	34.8	3049	1	1	1	612.811	1223.61	2	1223.61	-0.0007	0	33.08	0.0049	R	IEAYPFVEEK	D			File11922 Spectrum10010 scans: 8020
STL1GFP rep1	GFPtrap_STL1GFP_Callus_270914_rep1	2	AT2G41770	STL1	2057	88178	106	102	27	27	34.8	3050	1	1	1	612.811	1223.61	2	1223.61	-0.0006	0	61.39	7.3e-06	R	IEAYPFVEEK	D			File11922 Spectrum11796 scans: 8867
STL1GFP rep1	GFPtrap_STL1GFP_Callus_270914_rep1	2	AT2G41770	STL1	2057	88178	106	102	27	27	34.8	3051	1	1	1	612.811	1223.61	2	1223.61	-0.0006	0	46.64	0.00022	R	IEAYPFVEEK	D			File11922 Spectrum11912 scans: 8993
STL1GFP rep1	GFPtrap_STL1GFP_Callus_270914_rep1	2	AT2G41770	STL1	2057	88178	106	102	27	27	34.8	3052	1	1	1	612.811	1223.61	2	1223.61	-0.0001	0	24.91	0.034	R	IEAYPFVEEK	D			File11922 Spectrum13494 scans: 9644
STL1GFP rep1	GFPtrap_STL1GFP_Callus_270914_rep1	2	AT2G41770	STL1	2057	88178	106	102	27	27	34.8	3053	1	1	1	612.811	1223.61	2	1223.61	-0.0001	0	57.09	2.1e-05	R	IEAYPFVEEK	D			File11922 Spectrum12028 scans: 9122
STL1GFP rep1	GFPtrap_STL1GFP_Callus_270914_rep1	2	AT2G41770	STL1	2057	88178	106	102	27	27	34.8	3054	1	1	1	612.811	1223.61	2	1223.61	0	0	41.09	0.00082	R	IEAYPFVEEK	D			File11922 Spectrum12357 scans: 9510
STL1GFP rep1	GFPtrap_STL1GFP_Callus_270914_rep1	2	AT2G41770	STL1	2057	88178	106	102	27	27	34.8	3055	1	1	1	612.811	1223.61	2	1223.61	0	0	51.73	7.1e-05	R	IEAYPFVEEK	D			File11922 Spectrum12139 scans: 9250
STL1GFP rep1	GFPtrap_STL1GFP_Callus_270914_rep1	2	AT2G41770	STL1	2057	88178	106	102	27	27	34.8	3056	1	1	1	612.811	1223.61	2	1223.61	0.0002	0	42.7	0.00057	R	IEAYPFVEEK	D			File11922 Spectrum12251 scans: 9380
STL1GFP rep1	GFPtrap_STL1GFP_Callus_270914_rep1	2	AT2G41770	STL1	2057	88178	106	102	27	27	34.8	4012	1	1	1	679.851	1357.69	2	1357.69	-0.0004	0	104.66	2.9e-10	K	HFDVELVGLDSK	Q			File11922 Spectrum15594 scans: 10861
STL1GFP rep1	GFPtrap_STL1GFP_Callus_270914_rep1	2	AT2G41770	STL1	2057	88178	106	102	27	27	34.8	4704	1	1	1	721.391	1440.77	2	1440.77	-0.0048	0	43.75	0.00035	R	GWQVLAIGNSATPK	D			File11922 Spectrum14106 scans: 10342
STL1GFP rep1	GFPtrap_STL1GFP_Callus_270914_rep1	2	AT2G41770	STL1	2057	88178	106	102	27	27	34.8	4705	1	1	1	721.394	1440.77	2	1440.77	0.0013	0	35.84	0.0022	R	GWQVLAIGNSATPK	D			File11922 Spectrum13869 scans: 10072
STL1GFP rep1	GFPtrap_STL1GFP_Callus_270914_rep1	2	AT2G41770	STL1	2057	88178	106	102	27	27	34.8	4856	1	1	1	487.589	1459.74	3	1459.75	-0.0015	0	25.85	0.032	R	VLDHLPYDSFVR	K			File11922 Spectrum10259 scans: 8297
STL1GFP rep1	GFPtrap_STL1GFP_Callus_270914_rep1	2	AT2G41770	STL1	2057	88178	106	102	27	27	34.8	4857	1	1	1	487.589	1459.75	3	1459.75	0.0006	0	47.16	0.00025	R	VLDHLPYDSFVR	K			File11922 Spectrum15586 scans: 10853
STL1GFP rep1	GFPtrap_STL1GFP_Callus_270914_rep1	2	AT2G41770	STL1	2057	88178	106	102	27	27	34.8	6089	1	1	1	397.967	1587.84	4	1587.84	-0.0014	1	30.75	0.01	R	VLDHLPYDSFVRK	S			File11922 Spectrum15557 scans: 10822
STL1GFP rep1	GFPtrap_STL1GFP_Callus_270914_rep1	2	AT2G41770	STL1	2057	88178	106	102	27	27	34.8	6403	1	1	1	541.604	1621.79	3	1621.79	-0.0017	0	36.34	0.003	K	TVSTMPAHFQVNYK	D			File11922 Spectrum13603 scans: 9771
STL1GFP rep1	GFPtrap_STL1GFP_Callus_270914_rep1	2	AT2G41770	STL1	2057	88178	106	102	27	27	34.8	6404	1	1	1	541.604	1621.79	3	1621.79	-0.0008	0	35.21	0.0039	K	TVSTMPAHFQVNYK	D			File11922 Spectrum13717 scans: 9898
STL1GFP rep1	GFPtrap_STL1GFP_Callus_270914_rep1	2	AT2G41770	STL1	2057	88178	106	102	27	27	34.8	6405	1	1	1	541.605	1621.79	3	1621.79	-0.0003	0	47.58	0.00023	K	TVSTMPAHFQVNYK	D			File11922 Spectrum13482 scans: 9631
STL1GFP rep1	GFPtrap_STL1GFP_Callus_270914_rep1	2	AT2G41770	STL1	2057	88178	106	102	27	27	34.8	6406	1	1	1	541.605	1621.79	3	1621.79	0.0003	0	20.67	0.11	K	TVSTMPAHFQVNYK	D			File11922 Spectrum12347 scans: 9499
STL1GFP rep1	GFPtrap_STL1GFP_Callus_270914_rep1	2	AT2G41770	STL1	2057	88178	106	102	27	27	34.8	6407	1	1	1	541.605	1621.79	3	1621.79	0.0005	0	38.67	0.0018	K	TVSTMPAHFQVNYK	D			File11922 Spectrum13830 scans: 10031
STL1GFP rep1	GFPtrap_STL1GFP_Callus_270914_rep1	2	AT2G41770	STL1	2057	88178	106	102	27	27	34.8	6684	1	1	1	548.275	1641.8	3	1641.8	-0.0019	1	34.22	0.0029	R	FDRIEAYPFVEEK	D			File11922 Spectrum15574 scans: 10840
STL1GFP rep1	GFPtrap_STL1GFP_Callus_270914_rep1	2	AT2G41770	STL1	2057	88178	106	102	27	27	34.8	8087	1	1	1	617.63	1849.87	3	1849.87	-0.0019	1	30.82	0.0067	K	IYDADDRGEVIDGDLGK	H			File11922 Spectrum11716 scans: 8771
STL1GFP rep1	GFPtrap_STL1GFP_Callus_270914_rep1	2	AT2G41770	STL1	2057	88178	106	102	27	27	34.8	8088	1	1	1	617.63	1849.87	3	1849.87	-0.0016	1	41.89	0.00053	K	IYDADDRGEVIDGDLGK	H			File11922 Spectrum12276 scans: 9414
STL1GFP rep1	GFPtrap_STL1GFP_Callus_270914_rep1	2	AT2G41770	STL1	2057	88178	106	102	27	27	34.8	8089	1	1	1	617.63	1849.87	3	1849.87	-0.0016	1	32.75	0.0044	K	IYDADDRGEVIDGDLGK	H			File11922 Spectrum12068 scans: 9165
STL1GFP rep1	GFPtrap_STL1GFP_Callus_270914_rep1	2	AT2G41770	STL1	2057	88178	106	102	27	27	34.8	8090	1	1	1	617.63	1849.87	3	1849.87	-0.0008	1	40.49	0.00073	K	IYDADDRGEVIDGDLGK	H			File11922 Spectrum11950 scans: 9034
STL1GFP rep1	GFPtrap_STL1GFP_Callus_270914_rep1	2	AT2G41770	STL1	2057	88178	106	102	27	27	34.8	8091	1	1	1	617.63	1849.87	3	1849.87	-0.0003	1	27.9	0.013	K	IYDADDRGEVIDGDLGK	H			File11922 Spectrum11833 scans: 8906
STL1GFP rep1	GFPtrap_STL1GFP_Callus_270914_rep1	2	AT2G41770	STL1	2057	88178	106	102	27	27	34.8	8092	1	1	1	617.63	1849.87	3	1849.87	-0.0001	1	46.11	0.0002	K	IYDADDRGEVIDGDLGK	H			File11922 Spectrum12173 scans: 9290
STL1GFP rep1	GFPtrap_STL1GFP_Callus_270914_rep1	2	AT2G41770	STL1	2057	88178	106	102	27	27	34.8	8093	1	1	1	617.63	1849.87	3	1849.87	0.0001	1	30.55	0.0072	K	IYDADDRGEVIDGDLGK	H			File11922 Spectrum12390 scans: 9547
STL1GFP rep1	GFPtrap_STL1GFP_Callus_270914_rep1	2	AT2G41770	STL1	2057	88178	106	102	27	27	34.8	8094	1	1	1	617.631	1849.87	3	1849.87	0.0008	1	33.43	0.0038	K	IYDADDRGEVIDGDLGK	H			File11922 Spectrum13530 scans: 9685
STL1GFP rep1	GFPtrap_STL1GFP_Callus_270914_rep1	2	AT2G41770	STL1	2057	88178	106	102	27	27	34.8	8095	1	1	1	617.631	1849.87	3	1849.87	0.0023	1	25.59	0.023	K	IYDADDRGEVIDGDLGK	H			File11922 Spectrum13650 scans: 9823
STL1GFP rep1	GFPtrap_STL1GFP_Callus_270914_rep1	2	AT2G41770	STL1	2057	88178	106	102	27	27	34.8	8295	1	1	1	637.991	1910.95	3	1910.95	-0.0007	0	59.87	1.3e-05	K	APAVHPWSISSEQDFIK	L			File11922 Spectrum15547 scans: 10812
STL1GFP rep1	GFPtrap_STL1GFP_Callus_270914_rep1	2	AT2G41770	STL1	2057	88178	106	102	27	27	34.8	8389	1	1	1	646.326	1935.96	3	1935.96	-0.0003	1	61.28	8.6e-06	K	NSDLYVEEAKLDHIYK	H			File11922 Spectrum15550 scans: 10815
STL1GFP rep1	GFPtrap_STL1GFP_Callus_270914_rep1	2	AT2G41770	STL1	2057	88178	106	102	27	27	34.8	8390	1	1	1	484.997	1935.96	4	1935.96	0.0002	1	38.4	0.0017	K	NSDLYVEEAKLDHIYK	H			File11922 Spectrum15549 scans: 10814
STL1GFP rep1	GFPtrap_STL1GFP_Callus_270914_rep1	2	AT2G41770	STL1	2057	88178	106	102	27	27	34.8	8553	1	1	1	984.477	1966.94	2	1966.94	0.0009	0	50.86	7.9e-05	K	NFGNVVLVMFCNGPVER	T	Oxidation (M)	0.00000000100000000.0	File11922 Spectrum15694 scans: 10967
STL1GFP rep1	GFPtrap_STL1GFP_Callus_270914_rep1	2	AT2G41770	STL1	2057	88178	106	102	27	27	34.8	8612	1	1	1	495.498	1977.96	4	1977.96	-0.0015	2	25.62	0.027	K	KIYDADDRGEVIDGDLGK	H			File11922 Spectrum14299 scans: 10563
STL1GFP rep1	GFPtrap_STL1GFP_Callus_270914_rep1	2	AT2G41770	STL1	2057	88178	106	102	27	27	34.8	8826	1	1	1	510.256	2037	4	2037	-0.0027	1	35.68	0.0031	K	TVSTMPAHFQVNYKDATK	N			File11922 Spectrum14310 scans: 10575
STL1GFP rep1	GFPtrap_STL1GFP_Callus_270914_rep1	2	AT2G41770	STL1	2057	88178	106	102	27	27	34.8	9100	1	1	1	705.7	2114.08	3	2114.08	-0.0014	1	37.53	0.0022	R	IEAYPFVEEKDLHVNVGR	L			File11922 Spectrum15554 scans: 10819
STL1GFP rep1	GFPtrap_STL1GFP_Callus_270914_rep1	2	AT2G41770	STL1	2057	88178	106	102	27	27	34.8	9101	1	1	1	529.527	2114.08	4	2114.08	-0.0001	1	55.88	3.1e-05	R	IEAYPFVEEKDLHVNVGR	L			File11922 Spectrum15548 scans: 10813
STL1GFP rep1	GFPtrap_STL1GFP_Callus_270914_rep1	2	AT2G41770	STL1	2057	88178	106	102	27	27	34.8	9123	1	1	1	708.674	2123	3	2123	-0.0004	0	70.11	7.1e-07	K	NNHETLTVCSSEVFYVPK	R			File11922 Spectrum15464 scans: 10718
STL1GFP rep1	GFPtrap_STL1GFP_Callus_270914_rep1	2	AT2G41770	STL1	2057	88178	106	102	27	27	34.8	9124	1	1	1	708.674	2123	3	2123	-0.0002	0	68.09	1.1e-06	K	NNHETLTVCSSEVFYVPK	R			File11922 Spectrum14315 scans: 10581
STL1GFP rep2	GFPtrap_STL1GFP_Callus_210215_rep2	1	AT2G41770	STL1	2472	88178	113	109	29	29	44	22	1	1	1	382.202	762.39	2	762.391	-0.0009	0	29.44	0.015	K	IWTTDK	V			File5076 Spectrum5004 scans: 6609
STL1GFP rep2	GFPtrap_STL1GFP_Callus_210215_rep2	1	AT2G41770	STL1	2472	88178	113	109	29	29	44	24	1	1	1	382.203	762.391	2	762.391	-0.0002	0	29.37	0.016	K	IWTTDK	V			File5076 Spectrum4892 scans: 6478
STL1GFP rep2	GFPtrap_STL1GFP_Callus_210215_rep2	1	AT2G41770	STL1	2472	88178	113	109	29	29	44	687	1	1	1	434.196	866.378	2	866.377	0.0008	0	27.36	0.0083	K	IYDADDR	G			File5076 Spectrum3937 scans: 5312
STL1GFP rep2	GFPtrap_STL1GFP_Callus_210215_rep2	1	AT2G41770	STL1	2472	88178	113	109	29	29	44	1297	1	1	1	487.797	973.58	2	973.581	-0.0013	0	52.9	3.3e-05	K	TVVILSSQK	N			File5076 Spectrum5418 scans: 7090
STL1GFP rep2	GFPtrap_STL1GFP_Callus_210215_rep2	1	AT2G41770	STL1	2472	88178	113	109	29	29	44	1298	1	1	1	487.797	973.58	2	973.581	-0.0008	0	67.01	1.3e-06	K	TVVILSSQK	N			File5076 Spectrum5851 scans: 7600
STL1GFP rep2	GFPtrap_STL1GFP_Callus_210215_rep2	1	AT2G41770	STL1	2472	88178	113	109	29	29	44	1299	1	1	1	487.798	973.581	2	973.581	-0.0003	0	66.91	1.3e-06	K	TVVILSSQK	N			File5076 Spectrum5652 scans: 7351
STL1GFP rep2	GFPtrap_STL1GFP_Callus_210215_rep2	1	AT2G41770	STL1	2472	88178	113	109	29	29	44	1300	1	1	1	487.798	973.581	2	973.581	-0.0002	0	67.39	1.2e-06	K	TVVILSSQK	N			File5076 Spectrum5536 scans: 7219
STL1GFP rep2	GFPtrap_STL1GFP_Callus_210215_rep2	1	AT2G41770	STL1	2472	88178	113	109	29	29	44	1301	1	1	1	487.798	973.581	2	973.581	-0.0001	0	53.02	2.5e-05	K	TVVILSSQK	N			File5076 Spectrum5747 scans: 7472
STL1GFP rep2	GFPtrap_STL1GFP_Callus_210215_rep2	1	AT2G41770	STL1	2472	88178	113	109	29	29	44	1302	1	1	1	487.798	973.581	2	973.581	0.0003	0	47.48	8.8e-05	K	TVVILSSQK	N			File5076 Spectrum5943 scans: 7721
STL1GFP rep2	GFPtrap_STL1GFP_Callus_210215_rep2	1	AT2G41770	STL1	2472	88178	113	109	29	29	44	1303	1	1	1	487.798	973.582	2	973.581	0.001	0	25.23	0.015	K	TVVILSSQK	N			File5076 Spectrum6056 scans: 7850
STL1GFP rep2	GFPtrap_STL1GFP_Callus_210215_rep2	1	AT2G41770	STL1	2472	88178	113	109	29	29	44	1822	1	1	1	533.282	1064.55	2	1064.55	-0.0014	0	37.14	0.0026	K	TTLEAFDIR	F			File5076 Spectrum7987 scans: 10006
STL1GFP rep2	GFPtrap_STL1GFP_Callus_210215_rep2	1	AT2G41770	STL1	2472	88178	113	109	29	29	44	1823	1	1	1	533.283	1064.55	2	1064.55	0.0005	0	43.92	0.00051	K	TTLEAFDIR	F			File5076 Spectrum7785 scans: 9760
STL1GFP rep2	GFPtrap_STL1GFP_Callus_210215_rep2	1	AT2G41770	STL1	2472	88178	113	109	29	29	44	2345	1	1	1	577.813	1153.61	2	1153.61	-0.0022	0	31	0.0064	K	WNSIPVVPDK	T			File5076 Spectrum7021 scans: 8889
STL1GFP rep2	GFPtrap_STL1GFP_Callus_210215_rep2	1	AT2G41770	STL1	2472	88178	113	109	29	29	44	2346	1	1	1	577.814	1153.61	2	1153.61	0	0	50.48	8.5e-05	K	WNSIPVVPDK	T			File5076 Spectrum7249 scans: 9147
STL1GFP rep2	GFPtrap_STL1GFP_Callus_210215_rep2	1	AT2G41770	STL1	2472	88178	113	109	29	29	44	2347	1	1	1	577.814	1153.61	2	1153.61	0	0	52.69	5.1e-05	K	WNSIPVVPDK	T			File5076 Spectrum7356 scans: 9272
STL1GFP rep2	GFPtrap_STL1GFP_Callus_210215_rep2	1	AT2G41770	STL1	2472	88178	113	109	29	29	44	2348	1	1	1	577.814	1153.61	2	1153.61	0.0006	0	51.7	6e-05	K	WNSIPVVPDK	T			File5076 Spectrum7135 scans: 9016
STL1GFP rep2	GFPtrap_STL1GFP_Callus_210215_rep2	1	AT2G41770	STL1	2472	88178	113	109	29	29	44	2447	1	1	1	584.279	1166.54	2	1166.55	-0.0013	0	60.16	6.3e-06	K	NSDLYVEEAK	L			File5076 Spectrum5355 scans: 7022
STL1GFP rep2	GFPtrap_STL1GFP_Callus_210215_rep2	1	AT2G41770	STL1	2472	88178	113	109	29	29	44	2448	1	1	1	584.279	1166.54	2	1166.55	-0.001	0	55.72	1.8e-05	K	NSDLYVEEAK	L			File5076 Spectrum5621 scans: 7314
STL1GFP rep2	GFPtrap_STL1GFP_Callus_210215_rep2	1	AT2G41770	STL1	2472	88178	113	109	29	29	44	2449	1	1	1	584.279	1166.54	2	1166.55	-0.001	0	76.47	1.5e-07	K	NSDLYVEEAK	L			File5076 Spectrum5142 scans: 6772
STL1GFP rep2	GFPtrap_STL1GFP_Callus_210215_rep2	1	AT2G41770	STL1	2472	88178	113	109	29	29	44	2450	1	1	1	584.28	1166.54	2	1166.55	-0.0007	0	57.72	1.1e-05	K	NSDLYVEEAK	L			File5076 Spectrum5251 scans: 6896
STL1GFP rep2	GFPtrap_STL1GFP_Callus_210215_rep2	1	AT2G41770	STL1	2472	88178	113	109	29	29	44	2451	1	1	1	584.281	1166.55	2	1166.55	0.0011	0	70.27	7.4e-07	K	NSDLYVEEAK	L			File5076 Spectrum5492 scans: 7171
STL1GFP rep2	GFPtrap_STL1GFP_Callus_210215_rep2	1	AT2G41770	STL1	2472	88178	113	109	29	29	44	2575	1	1	1	398.555	1192.64	3	1192.65	-0.0022	1	23.72	0.042	R	KTTLEAFDIR	F			File5076 Spectrum8117 scans: 10158
STL1GFP rep2	GFPtrap_STL1GFP_Callus_210215_rep2	1	AT2G41770	STL1	2472	88178	113	109	29	29	44	2579	1	1	1	398.556	1192.65	3	1192.65	0.001	1	31.61	0.007	R	KTTLEAFDIR	F			File5076 Spectrum8309 scans: 10388
STL1GFP rep2	GFPtrap_STL1GFP_Callus_210215_rep2	1	AT2G41770	STL1	2472	88178	113	109	29	29	44	2802	1	1	1	612.81	1223.61	2	1223.61	-0.0023	0	37.74	0.0017	R	IEAYPFVEEK	D			File5076 Spectrum7100 scans: 8976
STL1GFP rep2	GFPtrap_STL1GFP_Callus_210215_rep2	1	AT2G41770	STL1	2472	88178	113	109	29	29	44	2803	1	1	1	612.81	1223.61	2	1223.61	-0.0012	0	47.79	0.00016	R	IEAYPFVEEK	D			File5076 Spectrum7769 scans: 9742
STL1GFP rep2	GFPtrap_STL1GFP_Callus_210215_rep2	1	AT2G41770	STL1	2472	88178	113	109	29	29	44	2804	1	1	1	612.81	1223.61	2	1223.61	-0.0011	0	54.6	3.4e-05	R	IEAYPFVEEK	D			File5076 Spectrum7659 scans: 9614
STL1GFP rep2	GFPtrap_STL1GFP_Callus_210215_rep2	1	AT2G41770	STL1	2472	88178	113	109	29	29	44	2805	1	1	1	612.811	1223.61	2	1223.61	-0.0006	0	55.93	2.6e-05	R	IEAYPFVEEK	D			File5076 Spectrum7215 scans: 9110
STL1GFP rep2	GFPtrap_STL1GFP_Callus_210215_rep2	1	AT2G41770	STL1	2472	88178	113	109	29	29	44	2806	1	1	1	612.811	1223.61	2	1223.61	0	0	65.44	3e-06	R	IEAYPFVEEK	D			File5076 Spectrum7440 scans: 9365
STL1GFP rep2	GFPtrap_STL1GFP_Callus_210215_rep2	1	AT2G41770	STL1	2472	88178	113	109	29	29	44	2807	1	1	1	612.811	1223.61	2	1223.61	0.0002	0	58.09	1.6e-05	R	IEAYPFVEEK	D			File5076 Spectrum7552 scans: 9489
STL1GFP rep2	GFPtrap_STL1GFP_Callus_210215_rep2	1	AT2G41770	STL1	2472	88178	113	109	29	29	44	2808	1	1	1	612.811	1223.61	2	1223.61	0.0005	0	51.53	7.4e-05	R	IEAYPFVEEK	D			File5076 Spectrum7330 scans: 9239
STL1GFP rep2	GFPtrap_STL1GFP_Callus_210215_rep2	1	AT2G41770	STL1	2472	88178	113	109	29	29	44	3224	1	1	1	643.306	1284.6	2	1284.6	-0.0011	0	62.87	3.4e-06	K	TSPYANFQTEK	W			File5076 Spectrum5455 scans: 7132
STL1GFP rep2	GFPtrap_STL1GFP_Callus_210215_rep2	1	AT2G41770	STL1	2472	88178	113	109	29	29	44	3225	1	1	1	643.307	1284.6	2	1284.6	0.0007	0	63.59	2.9e-06	K	TSPYANFQTEK	W			File5076 Spectrum5598 scans: 7287
STL1GFP rep2	GFPtrap_STL1GFP_Callus_210215_rep2	1	AT2G41770	STL1	2472	88178	113	109	29	29	44	3226	1	1	1	643.307	1284.6	2	1284.6	0.0008	0	28.78	0.0087	K	TSPYANFQTEK	W			File5076 Spectrum5819 scans: 7561
STL1GFP rep2	GFPtrap_STL1GFP_Callus_210215_rep2	1	AT2G41770	STL1	2472	88178	113	109	29	29	44	3692	1	1	1	453.569	1357.69	3	1357.69	-0.0014	0	22.03	0.054	K	HFDVELVGLDSK	Q			File5076 Spectrum8568 scans: 10689
STL1GFP rep2	GFPtrap_STL1GFP_Callus_210215_rep2	1	AT2G41770	STL1	2472	88178	113	109	29	29	44	3693	1	1	1	453.57	1357.69	3	1357.69	-0.0008	0	29.5	0.0096	K	HFDVELVGLDSK	Q			File5076 Spectrum8714 scans: 10862
STL1GFP rep2	GFPtrap_STL1GFP_Callus_210215_rep2	1	AT2G41770	STL1	2472	88178	113	109	29	29	44	3694	1	1	1	453.57	1357.69	3	1357.69	-0.0004	0	28.88	0.011	K	HFDVELVGLDSK	Q			File5076 Spectrum8969 scans: 11151
STL1GFP rep2	GFPtrap_STL1GFP_Callus_210215_rep2	1	AT2G41770	STL1	2472	88178	113	109	29	29	44	4228	1	1	1	721.396	1440.78	2	1440.77	0.0046	0	36.75	0.0017	R	GWQVLAIGNSATPK	D			File5076 Spectrum8168 scans: 10220
STL1GFP rep2	GFPtrap_STL1GFP_Callus_210215_rep2	1	AT2G41770	STL1	2472	88178	113	109	29	29	44	4314	1	1	1	487.589	1459.75	3	1459.75	-0.0003	0	42.75	0.00063	R	VLDHLPYDSFVR	K			File5076 Spectrum8821 scans: 10981
STL1GFP rep2	GFPtrap_STL1GFP_Callus_210215_rep2	1	AT2G41770	STL1	2472	88178	113	109	29	29	44	4315	1	1	1	487.589	1459.75	3	1459.75	-0.0001	0	47.36	0.00022	R	VLDHLPYDSFVR	K			File5076 Spectrum9043 scans: 11241
STL1GFP rep2	GFPtrap_STL1GFP_Callus_210215_rep2	1	AT2G41770	STL1	2472	88178	113	109	29	29	44	4317	1	1	1	487.589	1459.75	3	1459.75	0.0005	0	30	0.012	R	VLDHLPYDSFVR	K			File5076 Spectrum8937 scans: 11117
STL1GFP rep2	GFPtrap_STL1GFP_Callus_210215_rep2	1	AT2G41770	STL1	2472	88178	113	109	29	29	44	4318	1	1	1	487.59	1459.75	3	1459.75	0.0009	0	48.9	0.00016	R	VLDHLPYDSFVR	K			File5076 Spectrum8648 scans: 10782
STL1GFP rep2	GFPtrap_STL1GFP_Callus_210215_rep2	1	AT2G41770	STL1	2472	88178	113	109	29	29	44	5603	1	1	1	541.604	1621.79	3	1621.79	-0.0015	0	25.25	0.039	K	TVSTMPAHFQVNYK	D			File5076 Spectrum7283 scans: 9184
STL1GFP rep2	GFPtrap_STL1GFP_Callus_210215_rep2	1	AT2G41770	STL1	2472	88178	113	109	29	29	44	5604	1	1	1	541.604	1621.79	3	1621.79	-0.0012	0	23.5	0.058	K	TVSTMPAHFQVNYK	D			File5076 Spectrum7678 scans: 9636
STL1GFP rep2	GFPtrap_STL1GFP_Callus_210215_rep2	1	AT2G41770	STL1	2472	88178	113	109	29	29	44	5605	1	1	1	541.605	1621.79	3	1621.79	-0.0001	0	40.05	0.0013	K	TVSTMPAHFQVNYK	D			File5076 Spectrum7520 scans: 9453
STL1GFP rep2	GFPtrap_STL1GFP_Callus_210215_rep2	1	AT2G41770	STL1	2472	88178	113	109	29	29	44	5606	1	1	1	541.605	1621.79	3	1621.79	0.0012	0	25.98	0.03	K	TVSTMPAHFQVNYK	D			File5076 Spectrum7398 scans: 9317
STL1GFP rep2	GFPtrap_STL1GFP_Callus_210215_rep2	1	AT2G41770	STL1	2472	88178	113	109	29	29	44	6496	1	1	1	870.453	1738.89	2	1738.89	0.0027	0	100.63	9.2e-10	K	GSIFLSLDAQAELGYR	V			File5076 Spectrum9804 scans: 12062
STL1GFP rep2	GFPtrap_STL1GFP_Callus_210215_rep2	1	AT2G41770	STL1	2472	88178	113	109	29	29	44	7095	1	1	1	617.629	1849.87	3	1849.87	-0.0034	1	31.63	0.0054	K	IYDADDRGEVIDGDLGK	H			File5076 Spectrum7384 scans: 9302
STL1GFP rep2	GFPtrap_STL1GFP_Callus_210215_rep2	1	AT2G41770	STL1	2472	88178	113	109	29	29	44	7096	1	1	1	617.63	1849.87	3	1849.87	-0.0028	1	30.76	0.0067	K	IYDADDRGEVIDGDLGK	H			File5076 Spectrum7148 scans: 9031
STL1GFP rep2	GFPtrap_STL1GFP_Callus_210215_rep2	1	AT2G41770	STL1	2472	88178	113	109	29	29	44	7097	1	1	1	617.63	1849.87	3	1849.87	-0.0027	1	25.92	0.02	K	IYDADDRGEVIDGDLGK	H			File5076 Spectrum6690 scans: 8524
STL1GFP rep2	GFPtrap_STL1GFP_Callus_210215_rep2	1	AT2G41770	STL1	2472	88178	113	109	29	29	44	7099	1	1	1	617.63	1849.87	3	1849.87	-0.001	1	31.9	0.0053	K	IYDADDRGEVIDGDLGK	H			File5076 Spectrum6922 scans: 8779
STL1GFP rep2	GFPtrap_STL1GFP_Callus_210215_rep2	1	AT2G41770	STL1	2472	88178	113	109	29	29	44	7100	1	1	1	617.63	1849.87	3	1849.87	-0.0005	1	35.69	0.0022	K	IYDADDRGEVIDGDLGK	H			File5076 Spectrum6815 scans: 8656
STL1GFP rep2	GFPtrap_STL1GFP_Callus_210215_rep2	1	AT2G41770	STL1	2472	88178	113	109	29	29	44	7101	1	1	1	617.63	1849.87	3	1849.87	-0.0005	1	27.52	0.014	K	IYDADDRGEVIDGDLGK	H			File5076 Spectrum7273 scans: 9173
STL1GFP rep2	GFPtrap_STL1GFP_Callus_210215_rep2	1	AT2G41770	STL1	2472	88178	113	109	29	29	44	7103	1	1	1	617.631	1849.87	3	1849.87	0.0006	1	37.96	0.0014	K	IYDADDRGEVIDGDLGK	H			File5076 Spectrum7034 scans: 8904
STL1GFP rep2	GFPtrap_STL1GFP_Callus_210215_rep2	1	AT2G41770	STL1	2472	88178	113	109	29	29	44	7356	1	1	1	635.982	1904.93	3	1904.93	-0.0012	1	29.82	0.011	K	TTLEAFDIRFDEHSPK	V			File5076 Spectrum9161 scans: 11367
STL1GFP rep2	GFPtrap_STL1GFP_Callus_210215_rep2	1	AT2G41770	STL1	2472	88178	113	109	29	29	44	7357	1	1	1	635.983	1904.93	3	1904.93	-0.0007	1	24.21	0.042	K	TTLEAFDIRFDEHSPK	V			File5076 Spectrum9267 scans: 11491
STL1GFP rep2	GFPtrap_STL1GFP_Callus_210215_rep2	1	AT2G41770	STL1	2472	88178	113	109	29	29	44	7389	1	1	1	637.991	1910.95	3	1910.95	-0.0008	0	56.18	2.9e-05	K	APAVHPWSISSEQDFIK	L			File5076 Spectrum8661 scans: 10804
STL1GFP rep2	GFPtrap_STL1GFP_Callus_210215_rep2	1	AT2G41770	STL1	2472	88178	113	109	29	29	44	7390	1	1	1	637.991	1910.95	3	1910.95	-0.0005	0	80.4	1.1e-07	K	APAVHPWSISSEQDFIK	L			File5076 Spectrum8996 scans: 11181
STL1GFP rep2	GFPtrap_STL1GFP_Callus_210215_rep2	1	AT2G41770	STL1	2472	88178	113	109	29	29	44	7391	1	1	1	637.991	1910.95	3	1910.95	-0.0005	0	77.45	2.2e-07	K	APAVHPWSISSEQDFIK	L			File5076 Spectrum8776 scans: 10929
STL1GFP rep2	GFPtrap_STL1GFP_Callus_210215_rep2	1	AT2G41770	STL1	2472	88178	113	109	29	29	44	7392	1	1	1	637.991	1910.95	3	1910.95	-0.0001	0	61.14	9.5e-06	K	APAVHPWSISSEQDFIK	L			File5076 Spectrum8882 scans: 11053
STL1GFP rep2	GFPtrap_STL1GFP_Callus_210215_rep2	1	AT2G41770	STL1	2472	88178	113	109	29	29	44	7393	1	1	1	637.992	1910.95	3	1910.95	0.0006	0	53.12	6e-05	K	APAVHPWSISSEQDFIK	L			File5076 Spectrum9119 scans: 11321
STL1GFP rep2	GFPtrap_STL1GFP_Callus_210215_rep2	1	AT2G41770	STL1	2472	88178	113	109	29	29	44	7578	1	1	1	646.326	1935.96	3	1935.96	-0.0022	1	40.4	0.00098	K	NSDLYVEEAKLDHIYK	H			File5076 Spectrum8893 scans: 11066
STL1GFP rep2	GFPtrap_STL1GFP_Callus_210215_rep2	1	AT2G41770	STL1	2472	88178	113	109	29	29	44	7579	1	1	1	484.997	1935.96	4	1935.96	-0.0007	1	42.73	0.00062	K	NSDLYVEEAKLDHIYK	H			File5076 Spectrum8857 scans: 11023
STL1GFP rep2	GFPtrap_STL1GFP_Callus_210215_rep2	1	AT2G41770	STL1	2472	88178	113	109	29	29	44	7580	1	1	1	484.997	1935.96	4	1935.96	0.0014	1	37.99	0.0018	K	NSDLYVEEAKLDHIYK	H			File5076 Spectrum8746 scans: 10896
STL1GFP rep2	GFPtrap_STL1GFP_Callus_210215_rep2	1	AT2G41770	STL1	2472	88178	113	109	29	29	44	8059	1	1	1	509.263	2033.02	4	2033.02	0.0015	2	31.53	0.0093	R	KTTLEAFDIRFDEHSPK	V			File5076 Spectrum9359 scans: 11592
STL1GFP rep2	GFPtrap_STL1GFP_Callus_210215_rep2	1	AT2G41770	STL1	2472	88178	113	109	29	29	44	8395	1	1	1	529.527	2114.08	4	2114.08	-0.0006	1	65.28	3.6e-06	R	IEAYPFVEEKDLHVNVGR	L			File5076 Spectrum8975 scans: 11158
STL1GFP rep2	GFPtrap_STL1GFP_Callus_210215_rep2	1	AT2G41770	STL1	2472	88178	113	109	29	29	44	8396	1	1	1	529.527	2114.08	4	2114.08	-0.0003	1	57.22	2.3e-05	R	IEAYPFVEEKDLHVNVGR	L			File5076 Spectrum8856 scans: 11022
STL1GFP rep2	GFPtrap_STL1GFP_Callus_210215_rep2	1	AT2G41770	STL1	2472	88178	113	109	29	29	44	8397	1	1	1	529.527	2114.08	4	2114.08	0.0004	1	61.66	8.4e-06	R	IEAYPFVEEKDLHVNVGR	L			File5076 Spectrum8747 scans: 10897
STL1GFP rep2	GFPtrap_STL1GFP_Callus_210215_rep2	1	AT2G41770	STL1	2472	88178	113	109	29	29	44	8431	1	1	1	708.672	2122.99	3	2123	-0.0058	0	43.75	0.00031	K	NNHETLTVCSSEVFYVPK	R			File5076 Spectrum8516 scans: 10628
STL1GFP rep2	GFPtrap_STL1GFP_Callus_210215_rep2	1	AT2G41770	STL1	2472	88178	113	109	29	29	44	8434	1	1	1	708.674	2123	3	2123	0.002	0	29.87	0.008	K	NNHETLTVCSSEVFYVPK	R			File5076 Spectrum8297 scans: 10376
STL1GFP rep2	GFPtrap_STL1GFP_Callus_210215_rep2	1	AT2G41770	STL1	2472	88178	113	109	29	29	44	9779	1	1	1	822.748	2465.22	3	2465.22	-0.0017	0	84.96	3.5e-08	K	SWTSVKPTGNSDWFSVQAELVK	K			File5076 Spectrum9414 scans: 11650
STL1GFP rep2	GFPtrap_STL1GFP_Callus_210215_rep2	1	AT2G41770	STL1	2472	88178	113	109	29	29	44	9984	1	1	1	638.103	2548.38	4	2548.39	-0.0018	1	46.63	9.2e-05	R	KLPSVHLGVEETGTVSTEIGNLIR	W			File5076 Spectrum9417 scans: 11653
STL1GFP rep2	GFPtrap_STL1GFP_Callus_210215_rep2	1	AT2G41770	STL1	2472	88178	113	109	29	29	44	10283	1	1	1	887.121	2658.34	3	2658.34	-0.0019	1	46.42	0.00027	K	QFIQQGISNGLPDVDSVFYFTRK	T			File5076 Spectrum9660 scans: 11909
STL1GFP rep3	GFPtrap_STL1GFP_Callus_240215_rep3	1	AT2G41770	STL1	2282	88178	102	96	45	44	58.9	9	1	1	1	382.202	762.39	2	762.391	-0.0008	0	32.28	0.0077	K	IWTTDK	V			File4981 Spectrum3709 scans: 5735
STL1GFP rep3	GFPtrap_STL1GFP_Callus_240215_rep3	1	AT2G41770	STL1	2282	88178	102	96	45	44	58.9	10	1	1	1	382.202	762.39	2	762.391	-0.0007	0	33.91	0.0053	K	IWTTDK	V			File4981 Spectrum3598 scans: 5605
STL1GFP rep3	GFPtrap_STL1GFP_Callus_240215_rep3	1	AT2G41770	STL1	2282	88178	102	96	45	44	58.9	127	1	1	1	406.704	811.393	2	811.394	-0.0009	0	41.43	0.00039	R	ASIGHGDR	K			File4981 Spectrum1483 scans: 3255
STL1GFP rep3	GFPtrap_STL1GFP_Callus_240215_rep3	1	AT2G41770	STL1	2282	88178	102	96	45	44	58.9	128	1	1	1	406.704	811.393	2	811.394	-0.0005	0	55.04	2.3e-05	R	ASIGHGDR	K			File4981 Spectrum1347 scans: 3112
STL1GFP rep3	GFPtrap_STL1GFP_Callus_240215_rep3	1	AT2G41770	STL1	2282	88178	102	96	45	44	58.9	332	1	1	1	440.226	878.437	2	878.438	-0.0014	0	35.01	0.0024	K	YPTEELK	S			File4981 Spectrum3840 scans: 5883
STL1GFP rep3	GFPtrap_STL1GFP_Callus_240215_rep3	1	AT2G41770	STL1	2282	88178	102	96	45	44	58.9	333	1	1	1	440.226	878.438	2	878.438	-0.0005	0	35.64	0.0022	K	YPTEELK	S			File4981 Spectrum3944 scans: 6008
STL1GFP rep3	GFPtrap_STL1GFP_Callus_240215_rep3	1	AT2G41770	STL1	2282	88178	102	96	45	44	58.9	381	1	1	1	455.249	908.483	2	908.483	0.0004	0	41.44	0.00058	K	DLHVNVGR	L			File4981 Spectrum3767 scans: 5799
STL1GFP rep3	GFPtrap_STL1GFP_Callus_240215_rep3	1	AT2G41770	STL1	2282	88178	102	96	45	44	58.9	382	1	1	1	455.251	908.487	2	908.483	0.0045	0	22.94	0.038	K	DLHVNVGR	L			File4981 Spectrum3887 scans: 5942
STL1GFP rep3	GFPtrap_STL1GFP_Callus_240215_rep3	1	AT2G41770	STL1	2282	88178	102	96	45	44	58.9	516	1	1	1	487.798	973.581	2	973.581	0.0005	0	29.64	0.0054	K	TVVILSSQK	N			File4981 Spectrum4639 scans: 6887
STL1GFP rep3	GFPtrap_STL1GFP_Callus_240215_rep3	1	AT2G41770	STL1	2282	88178	102	96	45	44	58.9	517	1	1	1	487.799	973.583	2	973.581	0.0019	0	66.84	1.4e-06	K	TVVILSSQK	N			File4981 Spectrum4498 scans: 6649
STL1GFP rep3	GFPtrap_STL1GFP_Callus_240215_rep3	1	AT2G41770	STL1	2282	88178	102	96	45	44	58.9	809	1	1	1	533.282	1064.55	2	1064.55	-0.0007	0	71.89	8.7e-07	K	TTLEAFDIR	F			File4981 Spectrum6441 scans: 8976
STL1GFP rep3	GFPtrap_STL1GFP_Callus_240215_rep3	1	AT2G41770	STL1	2282	88178	102	96	45	44	58.9	810	1	1	1	533.283	1064.55	2	1064.55	0.0008	0	78.17	2.3e-07	K	TTLEAFDIR	F			File4981 Spectrum6562 scans: 9109
STL1GFP rep3	GFPtrap_STL1GFP_Callus_240215_rep3	1	AT2G41770	STL1	2282	88178	102	96	45	44	58.9	999	1	1	1	561.307	1120.6	2	1120.6	-0.0004	0	39.04	0.0017	R	ELPTHQQIR	R			File4981 Spectrum2981 scans: 4905
STL1GFP rep3	GFPtrap_STL1GFP_Callus_240215_rep3	1	AT2G41770	STL1	2282	88178	102	96	45	44	58.9	1114	1	1	1	577.813	1153.61	2	1153.61	-0.0008	0	56.43	1.8e-05	K	WNSIPVVPDK	T			File4981 Spectrum5980 scans: 8467
STL1GFP rep3	GFPtrap_STL1GFP_Callus_240215_rep3	1	AT2G41770	STL1	2282	88178	102	96	45	44	58.9	1184	1	1	1	584.28	1166.55	2	1166.55	-0.0004	0	60.39	6.8e-06	K	NSDLYVEEAK	L			File4981 Spectrum4314 scans: 6434
STL1GFP rep3	GFPtrap_STL1GFP_Callus_240215_rep3	1	AT2G41770	STL1	2282	88178	102	96	45	44	58.9	1185	1	1	1	584.28	1166.55	2	1166.55	0.0009	0	58.22	1.2e-05	K	NSDLYVEEAK	L			File4981 Spectrum4447 scans: 6592
STL1GFP rep3	GFPtrap_STL1GFP_Callus_240215_rep3	1	AT2G41770	STL1	2282	88178	102	96	45	44	58.9	1300	1	1	1	398.556	1192.65	3	1192.65	0	1	47.78	0.00018	R	KTTLEAFDIR	F			File4981 Spectrum5325 scans: 7708
STL1GFP rep3	GFPtrap_STL1GFP_Callus_240215_rep3	1	AT2G41770	STL1	2282	88178	102	96	45	44	58.9	1301	1	1	1	398.556	1192.65	3	1192.65	0.0002	1	44.91	0.00035	R	KTTLEAFDIR	F			File4981 Spectrum5441 scans: 7837
STL1GFP rep3	GFPtrap_STL1GFP_Callus_240215_rep3	1	AT2G41770	STL1	2282	88178	102	96	45	44	58.9	1302	1	1	1	597.331	1192.65	2	1192.65	0.0021	1	51.59	6.4e-05	R	KTTLEAFDIR	F			File4981 Spectrum5341 scans: 7726
STL1GFP rep3	GFPtrap_STL1GFP_Callus_240215_rep3	1	AT2G41770	STL1	2282	88178	102	96	45	44	58.9	1443	1	1	1	612.812	1223.61	2	1223.61	0.0014	0	49	0.00013	R	IEAYPFVEEK	D			File4981 Spectrum6080 scans: 8580
STL1GFP rep3	GFPtrap_STL1GFP_Callus_240215_rep3	1	AT2G41770	STL1	2282	88178	102	96	45	44	58.9	1444	1	1	1	612.812	1223.61	2	1223.61	0.0016	0	56.25	2.5e-05	R	IEAYPFVEEK	D			File4981 Spectrum6206 scans: 8717
STL1GFP rep3	GFPtrap_STL1GFP_Callus_240215_rep3	1	AT2G41770	STL1	2282	88178	102	96	45	44	58.9	1740	1	1	1	643.308	1284.6	2	1284.6	0.0026	0	46.16	0.00015	K	TSPYANFQTEK	W			File4981 Spectrum4497 scans: 6648
STL1GFP rep3	GFPtrap_STL1GFP_Callus_240215_rep3	1	AT2G41770	STL1	2282	88178	102	96	45	44	58.9	2157	1	1	1	453.57	1357.69	3	1357.69	-0.0001	0	45.76	0.00021	K	HFDVELVGLDSK	Q			File4981 Spectrum6542 scans: 9088
STL1GFP rep3	GFPtrap_STL1GFP_Callus_240215_rep3	1	AT2G41770	STL1	2282	88178	102	96	45	44	58.9	2158	1	1	1	679.851	1357.69	2	1357.69	-0.0001	0	93.04	3.9e-09	K	HFDVELVGLDSK	Q			File4981 Spectrum6543 scans: 9089
STL1GFP rep3	GFPtrap_STL1GFP_Callus_240215_rep3	1	AT2G41770	STL1	2282	88178	102	96	45	44	58.9	2160	1	1	1	453.57	1357.69	3	1357.69	0.0005	0	54.46	2.8e-05	K	HFDVELVGLDSK	Q			File4981 Spectrum6421 scans: 8953
STL1GFP rep3	GFPtrap_STL1GFP_Callus_240215_rep3	1	AT2G41770	STL1	2282	88178	102	96	45	44	58.9	2596	1	1	1	481.265	1440.77	3	1440.77	0.0018	0	62.91	4.2e-06	R	GWQVLAIGNSATPK	D			File4981 Spectrum6889 scans: 9482
STL1GFP rep3	GFPtrap_STL1GFP_Callus_240215_rep3	1	AT2G41770	STL1	2282	88178	102	96	45	44	58.9	2597	1	1	1	721.395	1440.78	2	1440.77	0.0033	0	59.59	8.7e-06	R	GWQVLAIGNSATPK	D			File4981 Spectrum6871 scans: 9462
STL1GFP rep3	GFPtrap_STL1GFP_Callus_240215_rep3	1	AT2G41770	STL1	2282	88178	102	96	45	44	58.9	3359	1	1	1	541.605	1621.79	3	1621.79	0.0007	0	30.08	0.013	K	TVSTMPAHFQVNYK	D			File4981 Spectrum4933 scans: 7262
STL1GFP rep3	GFPtrap_STL1GFP_Callus_240215_rep3	1	AT2G41770	STL1	2282	88178	102	96	45	44	58.9	3360	1	1	1	541.605	1621.79	3	1621.79	0.0018	0	32.94	0.0063	K	TVSTMPAHFQVNYK	D			File4981 Spectrum5029 scans: 7381
STL1GFP rep3	GFPtrap_STL1GFP_Callus_240215_rep3	1	AT2G41770	STL1	2282	88178	102	96	45	44	58.9	3361	1	1	1	811.904	1621.79	2	1621.79	0.0018	0	24.17	0.048	K	TVSTMPAHFQVNYK	D			File4981 Spectrum4939 scans: 7269
STL1GFP rep3	GFPtrap_STL1GFP_Callus_240215_rep3	1	AT2G41770	STL1	2282	88178	102	96	45	44	58.9	3429	1	1	1	548.277	1641.81	3	1641.8	0.0043	1	33.52	0.0038	R	FDRIEAYPFVEEK	D			File4981 Spectrum6165 scans: 8673
STL1GFP rep3	GFPtrap_STL1GFP_Callus_240215_rep3	1	AT2G41770	STL1	2282	88178	102	96	45	44	58.9	3430	1	1	1	821.912	1641.81	2	1641.8	0.0046	1	43.43	0.00037	R	FDRIEAYPFVEEK	D			File4981 Spectrum6179 scans: 8688
STL1GFP rep3	GFPtrap_STL1GFP_Callus_240215_rep3	1	AT2G41770	STL1	2282	88178	102	96	45	44	58.9	3819	1	1	1	870.452	1738.89	2	1738.89	-0.0001	0	62.79	5.5e-06	K	GSIFLSLDAQAELGYR	V			File4981 Spectrum8737 scans: 11571
STL1GFP rep3	GFPtrap_STL1GFP_Callus_240215_rep3	1	AT2G41770	STL1	2282	88178	102	96	45	44	58.9	4006	1	1	1	598.001	1790.98	3	1790.98	0.0002	1	51.79	4.9e-05	K	WIVVSVTKYPTEELK	S			File4981 Spectrum6584 scans: 9132
STL1GFP rep3	GFPtrap_STL1GFP_Callus_240215_rep3	1	AT2G41770	STL1	2282	88178	102	96	45	44	58.9	4007	1	1	1	896.499	1790.98	2	1790.98	0.0012	1	50.63	7e-05	K	WIVVSVTKYPTEELK	S			File4981 Spectrum6590 scans: 9138
STL1GFP rep3	GFPtrap_STL1GFP_Callus_240215_rep3	1	AT2G41770	STL1	2282	88178	102	96	45	44	58.9	4219	1	1	1	925.942	1849.87	2	1849.87	0.0002	1	21.03	0.068	K	IYDADDRGEVIDGDLGK	H			File4981 Spectrum5009 scans: 7355
STL1GFP rep3	GFPtrap_STL1GFP_Callus_240215_rep3	1	AT2G41770	STL1	2282	88178	102	96	45	44	58.9	4220	1	1	1	617.63	1849.87	3	1849.87	0.0003	1	40.63	0.00074	K	IYDADDRGEVIDGDLGK	H			File4981 Spectrum5112 scans: 7473
STL1GFP rep3	GFPtrap_STL1GFP_Callus_240215_rep3	1	AT2G41770	STL1	2282	88178	102	96	45	44	58.9	4221	1	1	1	617.631	1849.87	3	1849.87	0.0014	1	37.78	0.0014	K	IYDADDRGEVIDGDLGK	H			File4981 Spectrum4996 scans: 7339
STL1GFP rep3	GFPtrap_STL1GFP_Callus_240215_rep3	1	AT2G41770	STL1	2282	88178	102	96	45	44	58.9	4222	1	1	1	617.631	1849.87	3	1849.87	0.0014	1	42.18	0.00051	K	IYDADDRGEVIDGDLGK	H			File4981 Spectrum5223 scans: 7597
STL1GFP rep3	GFPtrap_STL1GFP_Callus_240215_rep3	1	AT2G41770	STL1	2282	88178	102	96	45	44	58.9	4223	1	1	1	617.631	1849.87	3	1849.87	0.0021	1	30.75	0.007	K	IYDADDRGEVIDGDLGK	H			File4981 Spectrum5342 scans: 7727
STL1GFP rep3	GFPtrap_STL1GFP_Callus_240215_rep3	1	AT2G41770	STL1	2282	88178	102	96	45	44	58.9	4419	1	1	1	637.991	1910.95	3	1910.95	-0.0003	0	56.33	2.9e-05	K	APAVHPWSISSEQDFIK	L			File4981 Spectrum6530 scans: 9075
STL1GFP rep3	GFPtrap_STL1GFP_Callus_240215_rep3	1	AT2G41770	STL1	2282	88178	102	96	45	44	58.9	4420	1	1	1	956.484	1910.95	2	1910.95	0	0	63.71	5.2e-06	K	APAVHPWSISSEQDFIK	L			File4981 Spectrum6419 scans: 8951
STL1GFP rep3	GFPtrap_STL1GFP_Callus_240215_rep3	1	AT2G41770	STL1	2282	88178	102	96	45	44	58.9	4422	1	1	1	637.992	1910.96	3	1910.95	0.0024	0	67.44	2.2e-06	K	APAVHPWSISSEQDFIK	L			File4981 Spectrum6417 scans: 8948
STL1GFP rep3	GFPtrap_STL1GFP_Callus_240215_rep3	1	AT2G41770	STL1	2282	88178	102	96	45	44	58.9	4517	1	1	1	484.996	1935.95	4	1935.96	-0.0029	1	49.92	0.00011	K	NSDLYVEEAKLDHIYK	H			File4981 Spectrum5544 scans: 7962
STL1GFP rep3	GFPtrap_STL1GFP_Callus_240215_rep3	1	AT2G41770	STL1	2282	88178	102	96	45	44	58.9	4520	1	1	1	484.997	1935.96	4	1935.96	0.0007	1	25.69	0.032	K	NSDLYVEEAKLDHIYK	H			File4981 Spectrum5650 scans: 8088
STL1GFP rep3	GFPtrap_STL1GFP_Callus_240215_rep3	1	AT2G41770	STL1	2282	88178	102	96	45	44	58.9	4652	1	1	1	656.654	1966.94	3	1966.94	-0.0005	0	46.27	0.00022	K	NFGNVVLVMFCNGPVER	T	Oxidation (M)	0.00000000100000000.0	File4981 Spectrum7921 scans: 10656
STL1GFP rep3	GFPtrap_STL1GFP_Callus_240215_rep3	1	AT2G41770	STL1	2282	88178	102	96	45	44	58.9	4699	1	1	1	660.329	1977.96	3	1977.96	0.0001	2	39.41	0.0012	K	KIYDADDRGEVIDGDLGK	H			File4981 Spectrum4815 scans: 7118
STL1GFP rep3	GFPtrap_STL1GFP_Callus_240215_rep3	1	AT2G41770	STL1	2282	88178	102	96	45	44	58.9	4700	1	1	1	495.498	1977.96	4	1977.96	0.0002	2	22.01	0.065	K	KIYDADDRGEVIDGDLGK	H			File4981 Spectrum4780 scans: 7075
STL1GFP rep3	GFPtrap_STL1GFP_Callus_240215_rep3	1	AT2G41770	STL1	2282	88178	102	96	45	44	58.9	4701	1	1	1	660.329	1977.97	3	1977.96	0.001	2	24.51	0.037	K	KIYDADDRGEVIDGDLGK	H			File4981 Spectrum4637 scans: 6885
STL1GFP rep3	GFPtrap_STL1GFP_Callus_240215_rep3	1	AT2G41770	STL1	2282	88178	102	96	45	44	58.9	4702	1	1	1	495.499	1977.97	4	1977.96	0.0011	2	41.69	0.0007	K	KIYDADDRGEVIDGDLGK	H			File4981 Spectrum4608 scans: 6846
STL1GFP rep3	GFPtrap_STL1GFP_Callus_240215_rep3	1	AT2G41770	STL1	2282	88178	102	96	45	44	58.9	4703	1	1	1	660.329	1977.97	3	1977.96	0.0011	2	33.08	0.0051	K	KIYDADDRGEVIDGDLGK	H			File4981 Spectrum4915 scans: 7239
STL1GFP rep3	GFPtrap_STL1GFP_Callus_240215_rep3	1	AT2G41770	STL1	2282	88178	102	96	45	44	58.9	4705	1	1	1	495.499	1977.97	4	1977.96	0.0013	2	32.68	0.0056	K	KIYDADDRGEVIDGDLGK	H			File4981 Spectrum4698 scans: 6964
STL1GFP rep3	GFPtrap_STL1GFP_Callus_240215_rep3	1	AT2G41770	STL1	2282	88178	102	96	45	44	58.9	4706	1	1	1	495.499	1977.97	4	1977.96	0.0023	2	23.39	0.048	K	KIYDADDRGEVIDGDLGK	H			File4981 Spectrum4882 scans: 7198
STL1GFP rep3	GFPtrap_STL1GFP_Callus_240215_rep3	1	AT2G41770	STL1	2282	88178	102	96	45	44	58.9	4707	1	1	1	660.33	1977.97	3	1977.96	0.0031	2	27.91	0.018	K	KIYDADDRGEVIDGDLGK	H			File4981 Spectrum4736 scans: 7008
STL1GFP rep3	GFPtrap_STL1GFP_Callus_240215_rep3	1	AT2G41770	STL1	2282	88178	102	96	45	44	58.9	4920	1	1	1	681.366	2041.08	3	2041.08	-0.003	0	22.23	0.066	R	LLWELGGYVAVYPPTAHR	F			File4981 Spectrum8568 scans: 11384
STL1GFP rep3	GFPtrap_STL1GFP_Callus_240215_rep3	1	AT2G41770	STL1	2282	88178	102	96	45	44	58.9	4921	1	1	1	681.367	2041.08	3	2041.08	-0.0004	0	30.84	0.0085	R	LLWELGGYVAVYPPTAHR	F			File4981 Spectrum8226 scans: 10991
STL1GFP rep3	GFPtrap_STL1GFP_Callus_240215_rep3	1	AT2G41770	STL1	2282	88178	102	96	45	44	58.9	4922	1	1	1	681.367	2041.08	3	2041.08	-0.0003	0	22.65	0.056	R	LLWELGGYVAVYPPTAHR	F			File4981 Spectrum8338 scans: 11115
STL1GFP rep3	GFPtrap_STL1GFP_Callus_240215_rep3	1	AT2G41770	STL1	2282	88178	102	96	45	44	58.9	4923	1	1	1	681.367	2041.08	3	2041.08	0.0005	0	29.43	0.012	R	LLWELGGYVAVYPPTAHR	F			File4981 Spectrum8686 scans: 11515
STL1GFP rep3	GFPtrap_STL1GFP_Callus_240215_rep3	1	AT2G41770	STL1	2282	88178	102	96	45	44	58.9	5024	1	1	1	693.035	2076.08	3	2076.08	0.0053	0	30.04	0.012	K	FTAAWLQDLIAVGYQQPR	L			File4981 Spectrum8911 scans: 11760
STL1GFP rep3	GFPtrap_STL1GFP_Callus_240215_rep3	1	AT2G41770	STL1	2282	88178	102	96	45	44	58.9	5025	1	1	1	1039.05	2076.09	2	2076.08	0.0109	0	78.11	1.7e-07	K	FTAAWLQDLIAVGYQQPR	L			File4981 Spectrum8900 scans: 11748
STL1GFP rep3	GFPtrap_STL1GFP_Callus_240215_rep3	1	AT2G41770	STL1	2282	88178	102	96	45	44	58.9	5031	1	1	1	694.02	2079.04	3	2079.04	-0.0006	1	67.41	2e-06	R	KNFGNVVLVMFCNGPVER	T			File4981 Spectrum7776 scans: 10483
STL1GFP rep3	GFPtrap_STL1GFP_Callus_240215_rep3	1	AT2G41770	STL1	2282	88178	102	96	45	44	58.9	5172	1	1	1	529.527	2114.08	4	2114.08	0.0001	1	60.81	1e-05	R	IEAYPFVEEKDLHVNVGR	L			File4981 Spectrum6011 scans: 8499
STL1GFP rep3	GFPtrap_STL1GFP_Callus_240215_rep3	1	AT2G41770	STL1	2282	88178	102	96	45	44	58.9	5199	1	1	1	1062.5	2122.99	2	2123	-0.0083	0	27.53	0.012	K	NNHETLTVCSSEVFYVPK	R			File4981 Spectrum6083 scans: 8583
STL1GFP rep3	GFPtrap_STL1GFP_Callus_240215_rep3	1	AT2G41770	STL1	2282	88178	102	96	45	44	58.9	5201	1	1	1	708.674	2123	3	2123	0.001	0	69.19	9.2e-07	K	NNHETLTVCSSEVFYVPK	R			File4981 Spectrum6187 scans: 8697
STL1GFP rep3	GFPtrap_STL1GFP_Callus_240215_rep3	1	AT2G41770	STL1	2282	88178	102	96	45	44	58.9	6075	1	1	1	774.4	2320.18	3	2320.17	0.0127	0	61.23	8.1e-06	R	LVTDFIDLVDLVGDMDLHYK	V			File4981 Spectrum8885 scans: 11733
STL1GFP rep3	GFPtrap_STL1GFP_Callus_240215_rep3	1	AT2G41770	STL1	2282	88178	102	96	45	44	58.9	6151	1	1	1	779.732	2336.17	3	2336.16	0.0119	0	28.47	0.016	R	LVTDFIDLVDLVGDMDLHYK	V	Oxidation (M)	0.00000000000000100000.0	File4981 Spectrum8898 scans: 11746
STL1GFP rep3	GFPtrap_STL1GFP_Callus_240215_rep3	1	AT2G41770	STL1	2282	88178	102	96	45	44	58.9	6411	1	1	1	807.741	2420.2	3	2420.2	-0.0001	1	20.38	0.096	K	WNSIPVVPDKTSPYANFQTEK	W			File4981 Spectrum6390 scans: 8919
STL1GFP rep3	GFPtrap_STL1GFP_Callus_240215_rep3	1	AT2G41770	STL1	2282	88178	102	96	45	44	58.9	6527	1	1	1	822.748	2465.22	3	2465.22	-0.0002	0	56.8	2.2e-05	K	SWTSVKPTGNSDWFSVQAELVK	K			File4981 Spectrum7615 scans: 10294
STL1GFP rep3	GFPtrap_STL1GFP_Callus_240215_rep3	1	AT2G41770	STL1	2282	88178	102	96	45	44	58.9	6561	1	1	1	826.428	2476.26	3	2476.27	-0.006	1	20.8	0.082	K	RLVTDFIDLVDLVGDMDLHYK	V			File4981 Spectrum9007 scans: 11873
STL1GFP rep3	GFPtrap_STL1GFP_Callus_240215_rep3	1	AT2G41770	STL1	2282	88178	102	96	45	44	58.9	6563	1	1	1	826.432	2476.27	3	2476.27	0.0061	1	62.79	5e-06	K	RLVTDFIDLVDLVGDMDLHYK	V			File4981 Spectrum8905 scans: 11754
STL1GFP rep3	GFPtrap_STL1GFP_Callus_240215_rep3	1	AT2G41770	STL1	2282	88178	102	96	45	44	58.9	6619	1	1	1	831.764	2492.27	3	2492.26	0.0095	1	23.58	0.04	K	RLVTDFIDLVDLVGDMDLHYK	V	Oxidation (M)	0.000000000000000100000.0	File4981 Spectrum8914 scans: 11763
STL1GFP rep3	GFPtrap_STL1GFP_Callus_240215_rep3	1	AT2G41770	STL1	2282	88178	102	96	45	44	58.9	6785	1	1	1	638.104	2548.39	4	2548.39	-0.0011	1	25.77	0.011	R	KLPSVHLGVEETGTVSTEIGNLIR	W			File4981 Spectrum7429 scans: 10080
STL1GFP rep3	GFPtrap_STL1GFP_Callus_240215_rep3	1	AT2G41770	STL1	2282	88178	102	96	45	44	58.9	7807	1	1	1	1013.15	3036.44	3	3036.44	0.0009	0	60.83	6.9e-06	R	YSSAEGFLFVEDDTVLNYWNLLQADK	S			File4981 Spectrum8908 scans: 11757
STL1GFP rep3	GFPtrap_STL1GFP_Callus_240215_rep3	2	AT3G57420	STL2	610	87776	39	39	20	20	25.9	9	1	0	1	382.202	762.39	2	762.391	-0.0008	0	32.28	0.0077	K	LWTTDK	V			File4981 Spectrum3709 scans: 5735
STL1GFP rep3	GFPtrap_STL1GFP_Callus_240215_rep3	2	AT3G57420	STL2	610	87776	39	39	20	20	25.9	10	1	0	1	382.202	762.39	2	762.391	-0.0007	0	33.91	0.0053	K	LWTTDK	V			File4981 Spectrum3598 scans: 5605
STL1GFP rep3	GFPtrap_STL1GFP_Callus_240215_rep3	2	AT3G57420	STL2	610	87776	39	39	20	20	25.9	227	1	1	1	426.198	850.381	2	850.382	-0.0009	0	21.22	0.059	K	IFDADDR	G			File4981 Spectrum4067 scans: 6147
STL1GFP rep3	GFPtrap_STL1GFP_Callus_240215_rep3	2	AT3G57420	STL2	610	87776	39	39	20	20	25.9	1012	1	1	1	563.283	1124.55	2	1124.55	0.0002	0	32.68	0.0048	K	TTFEPFDIR	F			File4981 Spectrum7095 scans: 9706
STL1GFP rep3	GFPtrap_STL1GFP_Callus_240215_rep3	2	AT3G57420	STL2	610	87776	39	39	20	20	25.9	1180	1	1	1	583.788	1165.56	2	1165.56	0.0006	0	32.96	0.0045	K	NSDLYVQEAK	L			File4981 Spectrum4050 scans: 6128
STL1GFP rep3	GFPtrap_STL1GFP_Callus_240215_rep3	2	AT3G57420	STL2	610	87776	39	39	20	20	25.9	1570	1	1	1	418.557	1252.65	3	1252.65	0.0033	1	30.95	0.0092	R	KTTFEPFDIR	F			File4981 Spectrum5763 scans: 8217
STL1GFP rep3	GFPtrap_STL1GFP_Callus_240215_rep3	2	AT3G57420	STL2	610	87776	39	39	20	20	25.9	2743	1	1	1	492.261	1473.76	3	1473.76	0.0008	0	39.51	0.0013	R	ILDHLPYDSFVR	K			File4981 Spectrum6712 scans: 9278
STL1GFP rep3	GFPtrap_STL1GFP_Callus_240215_rep3	2	AT3G57420	STL2	610	87776	39	39	20	20	25.9	3519	1	1	1	554.962	1661.87	3	1661.86	0.0052	0	32.21	0.0063	K	IVSTMPVHFQVNYK	E			File4981 Spectrum5835 scans: 8299
STL1GFP rep3	GFPtrap_STL1GFP_Callus_240215_rep3	2	AT3G57420	STL2	610	87776	39	39	20	20	25.9	5078	1	1	1	523.015	2088.03	4	2088.03	0.0041	1	25.22	0.031	R	VEAYPFSDEKDLHINVGR	L			File4981 Spectrum5836 scans: 8300
STL1GFP rep3	GFPtrap_STL1GFP_Callus_240215_rep3	2	AT3G57420	STL2	610	87776	39	39	20	20	25.9	6600	1	1	1	829.742	2486.2	3	2486.21	-0.0029	0	25.72	0.027	K	QFIQQGISNGLPDVDSVYYSTR	K			File4981 Spectrum7820 scans: 10540
